# Supplementary material for: Stability of the Microbiome of the Sponge Mycale (Oxymycale) acerata in the Western Antarctic Peninsula
Source: Front Microbiol. 2022 Apr 4;13:827863. doi: 10.3389/fmicb.2022.827863 (PMC9014287; doi:10.3389/fmicb.2022.827863)
Supplement: Supplementary file 2 [file Table_2.xlsx]

## Sheet: Suplement Mycale
Supplementary Table 2.		Main results provided by existing studies on the microbiome of the sponge M. acerata at differences sites around Antarctica
	Species	Locality	Coordinates	Hyper-variant Region 16S	Database	Primers	Alpha Diversity (Mean (SD))					Dominant Prokaryotic Phylum/Family	Ref.	doi
							Total obs. OTUs	Sobs	Chao1	Shannon	Simpson
	Mycale (Oxymycale) acerata	Whalers Bay, Deception Island	62°59'02.4"S 60°33'44.1"W	V4	Silva v.132	Data not available	1381	Data not available	Data not available	Data not available	2.90 (2.773)	EC94 (64%)	Soriano et al. 2020	10.3389/fmars.2020.00474
	Mycale (Oxymycale) acerata	Cape Kemp , Doumer Island, Palmer Archipelago	64°51'58.6''S 63°37'46.7''W	V4-V5	Silva v.132	517f GTGYCAGCMGCCGCGGTAA 926r CCGYCAATTYMTTTRAGTTT	*206(51.12)	**179.3 (30.7)	183.1 (30.9)	1.6(0.4)	0.4(0.1)	EC94 (73%)	Cardenas et al. 2019	10.3389/fmicb.2019.02699
	Mycale (Oxymycale) acerata	Western Antarctic Peninsula (Fildes Bay, King Jorge Island and South Bay, Doumer Island)	62°12'17''S; 58°56'47''W 64°52'32''S; 63°35'02''W	V3	Silva v.128	Data not available	*2,091(316)	Data not available	2201.7(67.1)	4.49(0.24)	Data not available	SAR Clade 11 (8.23%) Alphaproteobacterial Order (6.22%)	Cárdenas et al. 2018a.	10.7717/peerj.4935
	Mycale (Oxymycale) acerata	Sites along the Western Antarctic Peninsula	62°14′4.23” S, 58°39′53.90” to 64°52'32''S; 63°35'02''W. See Fig 1.	V4-V5	Silva V.138	517f GTGYCAGCMGCCGCGGTAA 926r CCGYCAATTYMTTTRAGTTT	854	93.12(79.82)	166.06(150.41)	2.03(1.38)	0.42(0.26)	EC94 (65.85%) Flavobacteriaceae (8.68%)	This study	-
	Mycale (oxymycale) acerata_THB9	Terra Nova Bay, Ross Sea	74°41'42.3"S 164°04'52.9"E	V1-V2	Silva v.132	27f 5′-AGAGTTTGATCCTGGCTCAG-3′ 338 5′-GCT GCC TCC CGT AGG AGT-3′	42	Data not available	Data not available	4593	Data not available	Gammaproteobacteria (40%) Alphaproteobacteria (25,6%) Proteobacteria unclassified (13.6%)	Papale et al. 2020	10.3389/fevo.2020.00268
	Mycale (Aegogropila) sp._THB10	Terra Nova Bay, Ross Sea	74°41'24.0"S 164°06'06.5"E	V1-V2	Silva v.132	27f 5′-AGAGTTTGATCCTGGCTCAG-3′ 338 5′-GCT GCC TCC CGT AGG AGT-3′	24	Data not available	Data not available	3664	Data not available	Gammaproteobacteria (57%) Alphaproteobacteria (22.2%) Proteobacteria unclassified (9.1%)	Papale et al. 2020	10.3389/fevo.2020.00268
	* Average observed OTU in samples
	** Mean OTU richness in samples
