# Supplementary material for: Stability of the Microbiome of the Sponge Mycale (Oxymycale) acerata in the Western Antarctic Peninsula
Source: Front Microbiol. 2022 Apr 4;13:827863. doi: 10.3389/fmicb.2022.827863 (PMC9014287; doi:10.3389/fmicb.2022.827863)
Supplement: Supplementary file 3 [file Data_Sheet_1.xlsx]

## Sheet: Feuil1
	Suppl file 1 Relative abundance of prokaryotic OTUs associated with the sponge M.acerata sampled at differerent sites along the WAP
	Locality	Canal Neumayer, Doumer	Canal Neumayer, Doumer	Canal Neumayer, Doumer	Canal Neumayer, Doumer	Bahia South, Doumer	Bahia South, Doumer	Bahia South, Doumer	Bahia South, Doumer	Bahia South, Doumer	Bahia South, Doumer	Bahia South, Doumer	Bahia South, Doumer	Bahia South, Doumer	Bahia South, Doumer	Bahia South, Doumer	Bahia South, Doumer	Bahia South, Doumer	Bahia South, Doumer	Bahia South, Doumer	Potter Cove	Potter Cove	Paradise Bay	Cierva Cove (Primavera)	Wilhelmina Bay	Wilhelmina Bay	Curverville Island	Curverville Island	Curverville Island	Cape Kemp, Doumer	Cape Kemp, Doumer	Cape Kemp, Doumer
	Deep	10	10	10	10	10	20	20	20	20	20	20	20	20	10	10	10	20	20	20	20	20	25	10	25	25	10	10	10	10	10	10
	Year	2018	2018	2018	2018	2018	2018	2017	2018	2018	2017	2017	2017	2017	2018	2018	2018	2017	2018	2018	2019	2019	2019	2019	2019	2019	2019	2019	2019	2016	2017	2018
OTU1	d__Archaea;p__Crenarchaeota;c__Nitrososphaeria;o__Nitrosopumilales;f__Nitrosopumilaceae;g__Candidatus_Nitrosopumilus;__	0.0337819	0.0269745	0.00356799	0.00622045	0.0386415	0	0	0	0	0	0	0.0345724	0.0218494	0.0533965	0.0522719	0.432993	0.0428449	0.0328803	0.215876	0	0	0	0	0	0.0665299	0.192787	0	0	0	0	0.240327
OTU2	d__Archaea;p__Crenarchaeota;c__Nitrososphaeria;o__Nitrosopumilales;f__Nitrosopumilaceae;g__Candidatus_Nitrosopumilus;s__uncultured_crenarchaeote	0.0253364	0	0	0	0	0.0384408	0.0557569	0	0	0	0	0	0	0	0	0	0	0	0	0	0	0	0	0	0	0	0	0	0	0	0
OTU3	d__Archaea;p__Crenarchaeota;c__Nitrososphaeria;o__Nitrosopumilales;f__Nitrosopumilaceae;g__Candidatus_Nitrosopumilus;s__uncultured_euryarchaeote	0.0380046	0	0	0	0	0	0	0	0	0.0971172	0.0716461	0.0167286	0.0485543	0.163527	0.0716319	0.692078	0.0506349	0	0.223451	0	0	0	0.26892	0	0	0	0	0.362778	0	0	0
OTU4	d__Archaea;p__Halobacterota;c__Halobacteria;o__Halobacterales;__;__;__	0	0	0	0	0	0	0	0	0	0	0	0	0	0	0	0	0	0	0	0	0	0	0.0768344	0	0	0	0	0	0	0	0
OTU5	d__Archaea;p__Nanoarchaeota;c__Nanoarchaeia;o__Woesearchaeales;f__Woesearchaeales;g__Woesearchaeales;__	0	0	0	0	0	0	0	0	0	0	0	0	0	0	0.00387199	0	0	0	0	0	0	0	0	0	0	0	0	0	0	0	0
OTU6	d__Archaea;p__Nanoarchaeota;c__Nanoarchaeia;o__Woesearchaeales;f__Woesearchaeales;g__Woesearchaeales;s__uncultured_archaeon	0	0	0	0	0.00858701	0	0	0	0	0	0	0	0	0	0	0	0	0	0	0	0	0	0	0	0	0	0	0	0	0	0
OTU7	d__Bacteria;__;__;__;__;__;__	0.216767	0.0350669	0.151639	3.7219	1.29234	0.918736	1.26011	0.423458	0.230906	0.352689	0.10523	0.0981409	0.155374	0.550652	1.9147	0.170358	0.467399	1.73992	0.844569	0.366077	0.0671231	0.197461	0.96043	4.29916	2.53368	0.703107	0.287366	0.16554	0.0337069	0.0150015	0.31643
OTU8	d__Bacteria;p__Acidobacteriota;c__Acidobacteriae;o__Acidobacteriales;f__Acidobacteriaceae_(Subgroup_1);g__Granulicella;__	0	0	0	0	0	0	0	0	0	0	0	0	0	0	0	0	0	0	0	0.0305064	0	0	0	0	0	0	0	0	0	0	0
OTU9	d__Bacteria;p__Acidobacteriota;c__Acidobacteriae;o__PAUC26f;f__PAUC26f;g__PAUC26f;__	0	0	0	0	0	0	0	0	0	0	0	0	0	0.0133491	0.00774398	0	0	0	0	0	0	0	0	0	0	0	0	0	0	0	0
OTU10	d__Bacteria;p__Acidobacteriota;c__Blastocatellia;o__Blastocatellales;f__Blastocatellaceae;g__Blastocatella;__	0.00422274	0	0	0	0	0	0	0	0	0	0	0.00446095	0	0	0	0.205849	0	0	0	0	0	0	0	0	0	0	0	0	0	0	0
OTU11	d__Bacteria;p__Acidobacteriota;c__Blastocatellia;o__Blastocatellales;f__Blastocatellaceae;g__Blastocatella;s__uncultured_Acidobacteriaceae	0	0	0	0	0.00858701	0	0	0	0	0	0	0	0	0	0	0	0	0	0	0	0	0	0	0	0	0	0	0	0	0	0
OTU12	d__Bacteria;p__Acidobacteriota;c__Holophagae;o__Acanthopleuribacterales;f__Acanthopleuribacteraceae;g__Acanthopleuribacter;s__uncultured_bacterium	0	0	0	0	0	0	0	0	0	0	0	0	0	0	0	0	0	0	0.00757461	0	0	0	0	0	0.0277208	0	0	0	0	0	0
OTU13	d__Bacteria;p__Acidobacteriota;c__Subgroup_22;o__Subgroup_22;f__Subgroup_22;g__Subgroup_22;__	0	0	0	0	0	0	0	0	0	0	0	0	0	0.00834321	0	0.0177456	0	0	0	0	0	0	0	0	0	0	0	0	0	0	0
OTU14	d__Bacteria;p__Acidobacteriota;c__Subgroup_22;o__Subgroup_22;f__Subgroup_22;g__Subgroup_22;s__uncultured_bacterium	0	0	0	0	0	0	0	0	0	0	0	0	0	0.00500592	0	0.0106474	0	0	0	0	0	0	0	0	0	0	0	0	0	0	0
OTU15	d__Bacteria;p__Acidobacteriota;c__Subgroup_26;o__Subgroup_26;f__Subgroup_26;g__Subgroup_26;s__uncultured_bacterium	0	0	0	0	0	0	0	0	0	0	0	0.00446095	0	0.00333728	0.01936	0	0	0	0.0265111	0	0	0	0	0	0	0	0	0	0	0	0
OTU16	d__Bacteria;p__Acidobacteriota;c__Thermoanaerobaculia;o__Thermoanaerobaculales;f__Thermoanaerobaculaceae;g__Subgroup_10;__	0.00985305	0	0	0	0	0	0	0	0	0	0	0.00446095	0	0	0	0.0922771	0	0	0	0	0	0	0	0	0	0	0	0	0	0	0
OTU17	d__Bacteria;p__Acidobacteriota;c__Thermoanaerobaculia;o__Thermoanaerobaculales;f__Thermoanaerobaculaceae;g__Subgroup_10;s__Holophaga_sp.	0	0	0	0	0	0	0	0	0	0	0	0	0	0	0	0.0354912	0	0	0	0	0	0	0	0	0	0	0	0	0	0	0.100136
OTU18	d__Bacteria;p__Acidobacteriota;c__Thermoanaerobaculia;o__Thermoanaerobaculales;f__Thermoanaerobaculaceae;g__Subgroup_10;s__uncultured_bacterium	0	0	0	0	0.00858701	0	0	0	0	0	0	0	0	0.0584024	0	0	0	0	0.00757461	0	0	0	0	0	0	0	0	0	0	0	0
OTU19	d__Bacteria;p__Acidobacteriota;c__Thermoanaerobaculia;o__Thermoanaerobaculales;f__Thermoanaerobaculaceae;g__Subgroup_23;__	0	0	0	0	0	0	0	0	0	0	0	0	0	0	0	0	0	0	0	0	0	0	0.461007	0	0	0	0	0	0	0	0
OTU20	d__Bacteria;p__Acidobacteriota;c__Vicinamibacteria;o__Vicinamibacterales;f__uncultured;g__uncultured;__	0	0	0	0	0	0	0	0	0	0	0	0	0	0	0	0	0	0	0	0	0	0	0.192086	0	0	0	0	0	0	0	0
OTU21	d__Bacteria;p__Actinobacteriota;c__Acidimicrobiia;o__Actinomarinales;f__uncultured;g__uncultured;__	0	0	0	0	0	0	0.0111514	0	0	0	0	0	0	0	0	0	0	0	0	0	0	0	0	0	0	0	0	0	0	0	0
OTU22	d__Bacteria;p__Actinobacteriota;c__Acidimicrobiia;o__Actinomarinales;f__uncultured;g__uncultured;s__uncultured_Gram-positive	0	0	0	0	0	0	0	0	0	0	0	0	0	0	0	0.00709824	0	0	0	0	0	0	0	0	0	0	0	0	0	0	0
OTU23	d__Bacteria;p__Actinobacteriota;c__Acidimicrobiia;o__Microtrichales;f__Ilumatobacteraceae;g__Ilumatobacter;__	0	0	0	0	0	0	0	0.0026059	0	0	0	0	0.0315603	0.0350415	0	0	0	0	0.0568096	0	0	0	0	0	0	0	0	0	0	0	0
OTU24	d__Bacteria;p__Actinobacteriota;c__Acidimicrobiia;o__Microtrichales;f__Ilumatobacteraceae;g__Ilumatobacter;s__Ilumatobacter_nonamiensis	0	0	0	0	0.00858701	0	0.0390298	0	0	0	0	0	0	0.0183551	0	0.0390403	0	0	0	0	0	0	0	0	0	0	0	0	0	0	0.0240327
OTU25	d__Bacteria;p__Actinobacteriota;c__Acidimicrobiia;o__Microtrichales;f__Microtrichaceae;g__Sva0996_marine_group;__	0.00844547	0	0	0	0	0	0	0	0	0	0	0.00446095	0	0.0133491	0.0309759	0.0709824	0	0.00822008	0.0530223	0.0406752	0	0	0	0	0	0	0	0.0915751	0	0	0
OTU26	d__Bacteria;p__Actinobacteriota;c__Acidimicrobiia;o__Microtrichales;f__Microtrichaceae;g__Sva0996_marine_group;s__uncultured_organism	0	0	0	0	0	0	0	0	0	0	0	0.0100371	0	0.0216923	0.0445279	0	0.00778998	0	0.0265111	0	0	0	0	0	0	0	0	0.00704424	0	0	0
OTU27	d__Bacteria;p__Actinobacteriota;c__Acidimicrobiia;o__Microtrichales;f__Microtrichaceae;g__uncultured;__	0	0	0	0	0	0	0	0	0	0	0	0.00780666	0	0.00500592	0	0.0390403	0.00778998	0	0.0302984	0	0	0	0	0	0	0	0	0	0	0	0
OTU28	d__Bacteria;p__Actinobacteriota;c__Acidimicrobiia;o__Microtrichales;f__Microtrichaceae;g__uncultured;s__uncultured_Acidimicrobiales	0	0	0	0	0	0	0	0	0	0	0	0	0	0	0.013552	0.0212947	0	0	0.0227238	0	0	0	0	0	0	0	0	0	0	0	0.0160218
OTU29	d__Bacteria;p__Actinobacteriota;c__Actinobacteria;o__Actinomycetales;f__Actinomycetaceae;g__Actinomyces;s__Actinomyces_gerencseriae	0	0	0	0	0	0	0	0	0	0	0	0	0	0	0	0	0	0	0	0	0	0	0	0	0	0	0	0	0	0.0150015	0
OTU30	d__Bacteria;p__Actinobacteriota;c__Actinobacteria;o__Micrococcales;f__Microbacteriaceae;g__Candidatus_Aquiluna;__	0	0.0107898	0	0	0.017174	0.0153763	0	0	0	0	0.00895576	0	0	0	0.00580799	0	0	0	0	0	0	0	0	0	0	0	0	0	0	0	0
OTU31	d__Bacteria;p__Actinobacteriota;c__Actinobacteria;o__Micromonosporales;f__Micromonosporaceae;g__Longispora;s__uncultured_bacterium	0	0	0	0	0	0	0	0	0	0	0	0	0	0	0	0	0	0	0	0	0	0	0.115252	0	0	0	0	0	0	0	0
OTU32	d__Bacteria;p__Actinobacteriota;c__Actinobacteria;o__PeM15;f__PeM15;g__PeM15;__	0	0	0	0	0	0	0.0223028	0	0	0	0	0	0	0	0	0	0	0	0	0	0	0	0	0	0.0110883	0	0	0	0	0	0
OTU33	d__Bacteria;p__Actinobacteriota;c__Actinobacteria;o__Streptosporangiales;f__Thermomonosporaceae;__;__	0	0	0	0	0	0	0	0	0	0	0	0	0	0	0	0	0	0	0	0	0	0	0.0768344	0	0	0	0	0	0	0	0
OTU34	d__Bacteria;p__Bacteroidota;c__Bacteroidia;__;__;__;__	0	0	0	0	0	0	0	0	0	0	0.0156726	0.0111524	0	0.0133491	0.015488	0.0212947	0	0.00822008	0.0416604	0.0203376	0	0	0.0768344	0	0	0	0	0	0	0	0.0160218
OTU35	d__Bacteria;p__Bacteroidota;c__Bacteroidia;o__Bacteroidales;__;__;__	0	0	0	0.00622045	0	0	0	0	0	0	0	0	0	0	0	0	0	0	0	0.0813504	0	0	0.153669	0	0	0	0	0	0	0	0
OTU36	d__Bacteria;p__Bacteroidota;c__Bacteroidia;o__Bacteroidales;f__Bacteroidaceae;g__Bacteroides;__	0	0	0	0	0	0	0	0	0	0	0	0	0	0	0	0	0	0	0	0	0	0	0	0	0	0	0	0	0.0126401	0	0
OTU37	d__Bacteria;p__Bacteroidota;c__Bacteroidia;o__Bacteroidales;f__Bacteroidetes_BD2-2;g__Bacteroidetes_BD2-2;__	0	0	0	0	0	0	0	0	0	0	0	0	0	0	0	0	0	0	0	0.0406752	0	0	0.0768344	0	0	0	0	0	0	0	0
OTU38	d__Bacteria;p__Bacteroidota;c__Bacteroidia;o__Bacteroidales;f__Marinifilaceae;g__Marinifilum;__	0	0	0	0	0	0	0	0	0	0	0	0	0	0	0	0	0	0	0.0454477	0.0406752	0	0	0	0	0	0	0	0	0	0	0
OTU39	d__Bacteria;p__Bacteroidota;c__Bacteroidia;o__Bacteroidales;f__Marinifilaceae;g__Odoribacter;__	0	0	0	0	0	0	0	0	0	0	0.00671682	0	0	0	0	0	0	0	0	0	0	0	0	0	0	0	0	0	0	0	0
OTU40	d__Bacteria;p__Bacteroidota;c__Bacteroidia;o__Bacteroidales;f__Marinifilaceae;g__Odoribacter;s__uncultured_bacterium	0	0	0	0	0	0	0	0	0	0	0	0	0	0	0	0	0	0	0	0.0406752	0	0	0	0	0	0	0	0	0	0	0
OTU41	d__Bacteria;p__Bacteroidota;c__Bacteroidia;o__Bacteroidales;f__Marinilabiliaceae;__;__	0	0	0	0	0	0	0	0	0	0	0	0	0	0	0	0	0	0	0	0.0203376	0	0	0	0	0	0	0	0	0	0	0
OTU42	d__Bacteria;p__Bacteroidota;c__Bacteroidia;o__Bacteroidales;f__Marinilabiliaceae;g__Carboxylicivirga;__	0	0	0	0	0	0	0	0	0	0	0	0	0	0	0	0	0	0	0	0.0305064	0	0	0	0	0	0	0	0	0	0	0
OTU43	d__Bacteria;p__Bacteroidota;c__Bacteroidia;o__Bacteroidales;f__Marinilabiliaceae;g__Carboxylicivirga;s__uncultured_bacterium	0	0	0	0	0	0	0	0	0	0	0	0	0	0	0.00387199	0	0	0	0	0	0	0	0	0	0	0	0	0	0	0	0
OTU44	d__Bacteria;p__Bacteroidota;c__Bacteroidia;o__Bacteroidales;f__Marinilabiliaceae;g__Labilibacter;__	0	0	0	0	0	0	0	0	0	0	0	0.00557619	0.00971086	0	0	0	0	0	0	0.406752	0	0	0	0	0	0	0	0	0	0	0
OTU45	d__Bacteria;p__Bacteroidota;c__Bacteroidia;o__Bacteroidales;f__Muribaculaceae;g__Muribaculaceae;__	0	0	0	0	0	0	0	0	0	0	0	0	0	0	0	0	0	0	0	0	0	0	0	0	0	0	0.00684205	0	0	0	0
OTU46	d__Bacteria;p__Bacteroidota;c__Bacteroidia;o__Bacteroidales;f__Muribaculaceae;g__Muribaculaceae;s__uncultured_bacterium	0	0	0	0	0.017174	0	0	0	0	0	0	0	0	0	0.00387199	0.00709824	0	0	0	0	0	0	0	0	0	0	0	0	0	0.060006	0
OTU47	d__Bacteria;p__Bacteroidota;c__Bacteroidia;o__Bacteroidales;f__Prevotellaceae;g__Prevotella;__	0	0	0	0	0	0	0	0	0	0	0	0	0	0	0	0	0	0	0	0	0	0	0	0	0	0	0	0	0	0.020002	0.0160218
OTU48	d__Bacteria;p__Bacteroidota;c__Bacteroidia;o__Bacteroidales;f__Prolixibacteraceae;g__Roseimarinus;s__uncultured_bacterium	0	0	0	0	0	0	0	0	0	0	0	0	0	0	0	0	0	0	0	0	0.0268492	0	0	0	0	0	0	0	0	0	0
OTU49	d__Bacteria;p__Bacteroidota;c__Bacteroidia;o__Bacteroidales;f__Prolixibacteraceae;g__uncultured;__	0	0	0	0	0	0	0	0	0	0	0	0	0	0	0	0	0	0	0	0	0	0	0.307338	0	0	0	0	0	0	0	0
OTU50	d__Bacteria;p__Bacteroidota;c__Bacteroidia;o__Bacteroidales;f__SB-5;g__SB-5;__	0	0	0	0	0	0	0	0	0	0	0	0	0	0	0	0	0	0	0	0	0	0	0.115252	0	0	0	0	0	0	0	0
OTU51	d__Bacteria;p__Bacteroidota;c__Bacteroidia;o__Bacteroidales;f__SB-5;g__SB-5;s__bacterium_YC-LK-LKJ31	0	0	0	0	0	0	0	0	0	0	0	0	0	0	0	0	0	0	0	0.17287	0	0	0	0	0	0	0	0	0	0	0
OTU52	d__Bacteria;p__Bacteroidota;c__Bacteroidia;o__Bacteroidetes_VC2.1_Bac22;f__Bacteroidetes_VC2.1_Bac22;g__Bacteroidetes_VC2.1_Bac22;s__uncultured_organism	0	0	0	0	0	0	0	0	0	0	0	0	0	0	0	0	0	0	0	0	0	0	0.115252	0	0	0	0	0	0	0	0
OTU53	d__Bacteria;p__Bacteroidota;c__Bacteroidia;o__Chitinophagales;__;__;__	0	0	0	0	0	0	0	0	0	0	0.00895576	0.00334571	0	0.00333728	0	0.0106474	0	0	0	0	0	0	0	0	0	0	0	0	0	0	0
OTU54	d__Bacteria;p__Bacteroidota;c__Bacteroidia;o__Chitinophagales;f__37-13;g__37-13;s__uncultured_Bacteroidetes	0	0	0	0	0	0	0	0	0	0	0	0	0	0.0116805	0.011616	0	0	0	0.00757461	0	0	0	0	0	0	0	0	0	0	0	0
OTU55	d__Bacteria;p__Bacteroidota;c__Bacteroidia;o__Chitinophagales;f__Chitinophagaceae;g__Chitinophaga;__	0	0	0	0	0	0	0	0	0	0	0	0	0	0	0	0	0	0	0	2.09477	0	0	0.230503	0	0	0	0	0	0	0	0
OTU56	d__Bacteria;p__Bacteroidota;c__Bacteroidia;o__Chitinophagales;f__Chitinophagaceae;g__Edaphobaculum;__	0.00703789	0	0	0	0	0	0	0	0	0	0	0	0	0	0	0.0248438	0	0	0	0	0	0	0	0	0	0	0	0	0	0	0
OTU57	d__Bacteria;p__Bacteroidota;c__Bacteroidia;o__Chitinophagales;f__Chitinophagaceae;g__Taibaiella;__	0	0	0	0	0	0	0	0	0	0	0	0	0	0	0	0	0	0	0	0.396583	0	0	0	0	0	0	0	0	0	0	0
OTU58	d__Bacteria;p__Bacteroidota;c__Bacteroidia;o__Chitinophagales;f__Chitinophagaceae;g__Taibaiella;s__uncultured_Bacteroidetes	0.00563031	0	0	0	0.0128805	0	0	0	0	0	0	0	0.00971086	0	0.00580799	0.060335	0.019475	0	0	0	0	0	0	0	0	0	0	0	0.0252802	0	0.00801089
OTU59	d__Bacteria;p__Bacteroidota;c__Bacteroidia;o__Chitinophagales;f__Saprospiraceae;__;__	0	0	0	0.0124409	0	0	0	0.00390885	0	0	0	0	0	0.0333728	0.013552	0.0177456	0.01558	0	0.0265111	0	0	0	0.115252	0	0	0	0	0	0.0252802	0	0
OTU60	d__Bacteria;p__Bacteroidota;c__Bacteroidia;o__Chitinophagales;f__Saprospiraceae;g__Aureispira;__	0	0	0	0.00622045	0	0	0	0	0	0	0	0.00334571	0.0145663	0.0100118	0	0.15971	0	0	0.0227238	0	0	0	0	0	0	0	0	0	0.0547737	0	0
OTU61	d__Bacteria;p__Bacteroidota;c__Bacteroidia;o__Chitinophagales;f__Saprospiraceae;g__Aureispira;s__Saprospira_sp.	0	0	0	0.0103674	0	0	0	0	0	0	0	0	0	0	0	0	0	0	0	0	0	0	0	0	0	0	0	0	0	0	0
OTU62	d__Bacteria;p__Bacteroidota;c__Bacteroidia;o__Chitinophagales;f__Saprospiraceae;g__Aureispira;s__uncultured_Saprospiraceae	0	0	0	0	0	0	0	0	0	0	0	0	0	0	0	0	0	0	0	0	0	0	0	0	0	0.0453618	0	0	0	0	0
OTU63	d__Bacteria;p__Bacteroidota;c__Bacteroidia;o__Chitinophagales;f__Saprospiraceae;g__Lewinella;__	0	0	0	0.0145144	0	0	0.0111514	0.00390885	0	0	0	0	0	0	0.00967998	0.12067	0	0	0.0151492	0	0	0	0	0	0	0	0	0	0	0	0
OTU64	d__Bacteria;p__Bacteroidota;c__Bacteroidia;o__Chitinophagales;f__Saprospiraceae;g__Lewinella;s__Lewinella_cohaerens	0	0	0	0.0103674	0	0	0	0	0	0	0.0223894	0	0	0	0.021296	0	0	0	0	0	0	0	0	0	0	0	0	0	0	0	0
OTU65	d__Bacteria;p__Bacteroidota;c__Bacteroidia;o__Chitinophagales;f__Saprospiraceae;g__Lewinella;s__Lewinella_persica	0.0295591	0.0161847	0	0	0	0	0	0	0	0	0	0	0.0291326	0.0116805	0.01936	0.205849	0	0	0.0113619	0	0	0	0	0	0	0	0	0	0	0	0
OTU66	d__Bacteria;p__Bacteroidota;c__Bacteroidia;o__Chitinophagales;f__Saprospiraceae;g__Lewinella;s__Lewinella_sp.	0	0	0	0.0145144	0	0	0	0.0182413	0	0	0	0.0178438	0	0.0216923	0	0.0496877	0	0	0	0	0	0	0	0	0	0	0	0	0.0379203	0	0.0160218
OTU67	d__Bacteria;p__Bacteroidota;c__Bacteroidia;o__Chitinophagales;f__Saprospiraceae;g__Lewinella;s__uncultured_Bacteroidetes	0	0	0	0	0	0	0	0	0	0	0	0	0	0	0	0	0.00778998	0	0	0	0	0	0	0	0	0	0	0	0	0	0
OTU68	d__Bacteria;p__Bacteroidota;c__Bacteroidia;o__Chitinophagales;f__Saprospiraceae;g__Lewinella;s__uncultured_bacterium	0	0	0	0	0	0	0	0	0	0	0	0	0	0	0	0.0177456	0	0	0	0	0	0	0	0	0	0	0	0	0	0	0
OTU69	d__Bacteria;p__Bacteroidota;c__Bacteroidia;o__Chitinophagales;f__Saprospiraceae;g__Lewinella;s__uncultured_marine	0	0	0	0	0	0	0	0.00390885	0	0	0	0.00557619	0.0121386	0.0333728	0.0445279	0.0816298	0	0	0	0	0	0	0	0	0	0	0	0	0	0	0
OTU70	d__Bacteria;p__Bacteroidota;c__Bacteroidia;o__Chitinophagales;f__Saprospiraceae;g__Portibacter;__	0	0	0	0	0	0	0	0	0	0	0	0	0	0.0150178	0.011616	0.060335	0	0	0.0265111	0	0	0	0	0	0	0	0	0	0	0	0
OTU71	d__Bacteria;p__Bacteroidota;c__Bacteroidia;o__Chitinophagales;f__Saprospiraceae;g__Portibacter;s__Portibacter_lacus	0.00422274	0	0	0	0	0	0.0111514	0	0	0	0	0	0	0	0.013552	0	0	0	0	0	0	0	0	0	0	0	0	0	0.0547737	0	0
OTU72	d__Bacteria;p__Bacteroidota;c__Bacteroidia;o__Chitinophagales;f__Saprospiraceae;g__Portibacter;s__uncultured_Bacteroidetes	0	0	0	0	0	0	0	0	0	0	0	0	0	0	0.017424	0.0354912	0	0	0.0189365	0	0	0	0	0	0	0	0	0	0	0	0
OTU73	d__Bacteria;p__Bacteroidota;c__Bacteroidia;o__Chitinophagales;f__Saprospiraceae;g__Portibacter;s__uncultured_bacterium	0	0	0	0	0	0	0	0	0	0	0	0	0.0121386	0.041716	0.021296	0.0958262	0	0	0	0	0	0	0	0	0	0	0	0	0	0	0
OTU74	d__Bacteria;p__Bacteroidota;c__Bacteroidia;o__Chitinophagales;f__Saprospiraceae;g__Portibacter;s__uncultured_deep-sea	0	0	0	0	0	0	0	0	0	0	0	0	0	0.0100118	0.01936	0	0	0	0	0	0	0	0	0	0	0	0	0	0	0	0
OTU75	d__Bacteria;p__Bacteroidota;c__Bacteroidia;o__Chitinophagales;f__Saprospiraceae;g__Rubidimonas;s__uncultured_bacterium	0	0	0	0.0124409	0	0	0	0.0117265	0.00322945	0	0	0.0256505	0.00971086	0.0116805	0.013552	0.0248438	0	0	0	0	0	0	0	0	0	0	0	0	0.0842673	0	0.0240327
OTU76	d__Bacteria;p__Bacteroidota;c__Bacteroidia;o__Chitinophagales;f__Saprospiraceae;g__uncultured;__	0.0154834	0.029672	0	0.0580576	0.00858701	0.00768817	0.0167271	0.0221501	0	0	0.0156726	0.00669142	0.033988	0.205243	0.180048	0.436542	0	0	0.189365	0.0203376	0.0805477	0	0	0	0	0	0	0	0.0969074	0	0.0160218
OTU77	d__Bacteria;p__Bacteroidota;c__Bacteroidia;o__Chitinophagales;f__Saprospiraceae;g__uncultured;s__Saccharina_japonica	0	0	0	0	0	0	0	0	0	0	0.00895576	0	0	0	0	0	0	0	0	0	0	0	0	0	0	0	0	0	0	0	0
OTU78	d__Bacteria;p__Bacteroidota;c__Bacteroidia;o__Chitinophagales;f__Saprospiraceae;g__uncultured;s__Sargassum_vachellianum	0	0	0	0	0	0	0	0	0	0	0	0	0	0.0166864	0	0.0212947	0	0	0.0151492	0	0	0	0	0	0	0	0	0	0.00842673	0	0
OTU79	d__Bacteria;p__Bacteroidota;c__Bacteroidia;o__Chitinophagales;f__Saprospiraceae;g__uncultured;s__bacterium_episymbiont	0	0	0	0	0	0	0	0.0143324	0	0	0	0	0	0	0	0	0	0	0	0	0	0	0	0	0	0	0	0.00704424	0	0	0
OTU80	d__Bacteria;p__Bacteroidota;c__Bacteroidia;o__Chitinophagales;f__Saprospiraceae;g__uncultured;s__uncultured_Bacteroidetes	0	0	0	0	0.0214675	0	0	0	0	0	0	0	0	0	0	0	0	0	0	0	0	0	0	0	0	0	0	0	0	0	0
OTU81	d__Bacteria;p__Bacteroidota;c__Bacteroidia;o__Chitinophagales;f__Saprospiraceae;g__uncultured;s__uncultured_Sphingobacteriia	0	0	0	0	0	0	0	0	0	0	0	0.00669142	0	0.0283669	0	0	0.01558	0	0	0	0	0	0	0	0	0	0	0	0	0	0.0160218
OTU82	d__Bacteria;p__Bacteroidota;c__Bacteroidia;o__Chitinophagales;f__Saprospiraceae;g__uncultured;s__uncultured_Sphingobacterium	0	0	0	0	0	0	0	0	0	0	0	0	0	0.00834321	0.00967998	0.0390403	0	0	0.0151492	0	0	0	0	0	0	0	0	0	0	0	0
OTU83	d__Bacteria;p__Bacteroidota;c__Bacteroidia;o__Chitinophagales;f__Saprospiraceae;g__uncultured;s__uncultured_marine	0	0	0	0	0	0	0	0	0	0	0	0	0	0.0317042	0	0	0	0	0	0	0	0	0	0	0	0	0	0	0	0	0
OTU84	d__Bacteria;p__Bacteroidota;c__Bacteroidia;o__Chitinophagales;f__uncultured;g__uncultured;__	0	0	0	0	0	0	0	0	0	0.0204457	0.0201505	0.00334571	0.00971086	0.0533965	0.0251679	0.0816298	0	0	0.037873	0	0	0	0	0	0	0	0	0	0	0	0.0240327
OTU85	d__Bacteria;p__Bacteroidota;c__Bacteroidia;o__Chitinophagales;f__uncultured;g__uncultured;s__bacterium_episymbiont	0.0492652	0	0	0	0	0.0115323	0	0.00912064	0	0	0	0.00557619	0.0436989	0.00834321	0.00967998	0.0674333	0	0	0.00757461	0	0	0	0	0	0	0	0	0.00704424	0.0168535	0.020002	0
OTU86	d__Bacteria;p__Bacteroidota;c__Bacteroidia;o__Chitinophagales;f__uncultured;g__uncultured;s__uncultured_Bacteroidetes	0.00422274	0	0	0.0331757	0	0	0	0.0156354	0.00645891	0	0	0	0.0242771	0.0250296	0	0.0425894	0	0	0.0568096	0	0	0	0	0	0	0	0	0	0	0	0.00801089
OTU87	d__Bacteria;p__Bacteroidota;c__Bacteroidia;o__Chitinophagales;f__uncultured;g__uncultured;s__uncultured_Bacteroidetes/Chlorobi	0	0	0	0	0	0	0	0.00390885	0	0	0	0.0089219	0.00728314	0.0183551	0.00387199	0.0319421	0	0	0	0	0	0	0	0	0	0	0	0	0	0	0
OTU88	d__Bacteria;p__Bacteroidota;c__Bacteroidia;o__Chitinophagales;f__uncultured;g__uncultured;s__uncultured_Sphingobacteriales	0.0126682	0	0	0	0.00858701	0	0	0	0	0	0	0	0.00728314	0	0.021296	0.060335	0	0	0	0	0	0	0	0	0	0	0	0	0	0	0
OTU89	d__Bacteria;p__Bacteroidota;c__Bacteroidia;o__Chitinophagales;f__uncultured;g__uncultured;s__uncultured_organism	0	0	0	0	0.00858701	0	0	0	0	0	0	0	0	0	0.00387199	0	0	0	0	0	0	0	0	0	0	0	0	0	0	0	0
OTU90	d__Bacteria;p__Bacteroidota;c__Bacteroidia;o__Cytophagales;__;__;__	0	0	0	0	0	0	0	0	0	0	0	0	0	0	0	0	0	0	0	0	0	0	0.153669	0	0	0	0	0	0	0	0
OTU91	d__Bacteria;p__Bacteroidota;c__Bacteroidia;o__Cytophagales;f__Amoebophilaceae;g__Candidatus_Amoebophilus;s__microbial_mat	0	0	0	0	0	0	0	0	0	0	0	0	0	0	0	0.0248438	0	0	0	0	0	0	0	0	0	0	0	0	0	0	0
OTU92	d__Bacteria;p__Bacteroidota;c__Bacteroidia;o__Cytophagales;f__Amoebophilaceae;g__uncultured;__	0	0	0	0	0	0	0	0	0	0	0	0	0	0	0	0.0106474	0	0	0	0	0	0	0	0	0	0	0	0	0	0	0
OTU93	d__Bacteria;p__Bacteroidota;c__Bacteroidia;o__Cytophagales;f__Amoebophilaceae;g__uncultured;s__uncultured_bacterium	0	0	0	0	0	0	0	0	0	0	0	0	0	0.0116805	0	0.00709824	0	0	0.00757461	0	0	0	0	0	0	0	0	0	0	0.0250025	0
OTU94	d__Bacteria;p__Bacteroidota;c__Bacteroidia;o__Cytophagales;f__Bernardetiaceae;g__Garritya;s__Garritya_polymorpha	0	0	0	0	0	0	0	0	0	0	0	0	0	0.0150178	0	0	0	0	0	0	0	0	0	0	0	0	0	0	0	0	0
OTU95	d__Bacteria;p__Bacteroidota;c__Bacteroidia;o__Cytophagales;f__Cyclobacteriaceae;__;__	0	0	0	0	0.00858701	0	0	0	0	0	0	0	0	0	0	0.0425894	0	0	0	0	0	0	0	0	0	0	0	0	0	0	0
OTU96	d__Bacteria;p__Bacteroidota;c__Bacteroidia;o__Cytophagales;f__Cyclobacteriaceae;g__Cesiribacter;s__uncultured_bacterium	0	0	0	0	0	0	0	0	0	0	0	0	0	0	0	0	0	0	0	0	0	0	0.0768344	0	0	0	0	0	0	0	0
OTU97	d__Bacteria;p__Bacteroidota;c__Bacteroidia;o__Cytophagales;f__Cyclobacteriaceae;g__Cyclobacteriaceae;s__Fulvitalea_axinellae	0	0	0	0	0	0	0	0	0	0	0	0	0	0	0	0	0	0	0.0719588	0	0	0	0	0	0	0	0	0	0	0	0
OTU98	d__Bacteria;p__Bacteroidota;c__Bacteroidia;o__Cytophagales;f__Cyclobacteriaceae;g__Ekhidna;__	0.00703789	0	0	0	0.618265	0	0	0	0	1.62543	0	0	0.468549	0.0116805	0	0	0	0	0	0	0	0	0	0	0	0	0	0	0	0	0.0240327
OTU99	d__Bacteria;p__Bacteroidota;c__Bacteroidia;o__Cytophagales;f__Cyclobacteriaceae;g__Ekhidna;s__Ekhidna_lutea	0	0	0	0	5.39693	0	0	0	0	7.07422	0	0	2.77731	0	0	0.770159	0.506349	0	0	0	0	0	0	0	0	0	0	0	0	0	0.0280381
OTU100	d__Bacteria;p__Bacteroidota;c__Bacteroidia;o__Cytophagales;f__Cyclobacteriaceae;g__Ekhidna;s__uncultured_Bacteroidetes	0	0	0	0	0	0	0	0	0	0	0.00447788	0	0	0	0	0	0	0	0	0	0	0	0	0	0	0	0	0	0	0	0
OTU101	d__Bacteria;p__Bacteroidota;c__Bacteroidia;o__Cytophagales;f__Cyclobacteriaceae;g__Ekhidna;s__uncultured_Flexibacter	0	0	0	0	0	0	0	0	0	0	0.0201505	0	0	0	0	0	0	0	0	0	0	0	0	0	0	0	0	0	0	0	0
OTU102	d__Bacteria;p__Bacteroidota;c__Bacteroidia;o__Cytophagales;f__Cyclobacteriaceae;g__Ekhidna;s__uncultured_bacterium	0	0	0	0	0	0	0	0	0	0	0	0.0156133	0	0	0.00967998	0.0461386	0	0	0.0833207	0	0	0	0	0	0	0	0	0	0	0	0
OTU103	d__Bacteria;p__Bacteroidota;c__Bacteroidia;o__Cytophagales;f__Cyclobacteriaceae;g__Ekhidna;s__uncultured_deep-sea	0	0	0	0	0	0	0	0	0	0	0	0	0.00728314	0.00834321	0.023232	0.0141965	0	0	0	0	0	0	0.115252	0	0	0	0	0	0	0	0
OTU104	d__Bacteria;p__Bacteroidota;c__Bacteroidia;o__Cytophagales;f__Cyclobacteriaceae;g__Fabibacter;__	0	0	0	0	0	0	0	0	0	0	0	0.0479552	0	0.0133491	0.015488	0.0780806	0	0	0.049235	0	0	0	0	0	0	0	0	0	0.0252802	0.0150015	0
OTU105	d__Bacteria;p__Bacteroidota;c__Bacteroidia;o__Cytophagales;f__Cyclobacteriaceae;g__Fulvivirga;s__uncultured_Flexibacter	0	0	0	0	0	0	0	0	0	0	0	0	0	0	0	0	0	0	0	0	0	0	0.0768344	0	0	0	0	0	0	0	0
OTU106	d__Bacteria;p__Bacteroidota;c__Bacteroidia;o__Cytophagales;f__Cyclobacteriaceae;g__Fulvivirga;s__uncultured_bacterium	0.0985305	0	0	0.0248818	0.034348	0.0230645	0.0780597	0	0	0.0408914	0	0.0546466	0.0752592	0.186888	0.133584	0.390403	0.019475	0	0.102257	0	0	0	0	0	0	0	0	0	0.0294936	0	0.252343
OTU107	d__Bacteria;p__Bacteroidota;c__Bacteroidia;o__Cytophagales;f__Cyclobacteriaceae;g__Marinoscillum;__	0	0	0	0	0	0	0	0	0	0	0	0	0	0	0	0	0	0	0	0	0	0	0	0	0	0	0.0171051	0	0	0	0
OTU108	d__Bacteria;p__Bacteroidota;c__Bacteroidia;o__Cytophagales;f__Cyclobacteriaceae;g__Marinoscillum;s__Microscilla_sp.	0	0	0	0	0	0	0	0	0	0	0.00671682	0	0	0	0	0	0	0	0	0	0	0	0	0	0	0	0	0	0	0	0
OTU109	d__Bacteria;p__Bacteroidota;c__Bacteroidia;o__Cytophagales;f__Cyclobacteriaceae;g__Marinoscillum;s__marine_metagenome	0	0	0	0	0	0	0	0	0	0	0	0	0	0	0.00967998	0	0	0	0	0	0	0	0	0	0	0	0	0	0	0	0
OTU110	d__Bacteria;p__Bacteroidota;c__Bacteroidia;o__Cytophagales;f__Cyclobacteriaceae;g__Marinoscillum;s__uncultured_Cytophagia	0	0.0323694	0.00891997	0.0435432	0.0214675	0.138387	0.122665	0.00651474	0.0129178	0.0255571	0.100752	0.0245352	0.00728314	0.0250296	0.100672	0	0	0.0438404	0	0.0406752	0	0	0	0	0.0609858	0	0.0136841	0.0246548	0	0.120012	0.0120163
OTU111	d__Bacteria;p__Bacteroidota;c__Bacteroidia;o__Cytophagales;f__Cyclobacteriaceae;g__Nafulsella;s__uncultured_Flexibacter	0	0	0	0	0	0	0	0	0	0	0	0	0	0	0	0	0	0	0	0	0	0	0.115252	0	0	0	0	0	0	0	0
OTU112	d__Bacteria;p__Bacteroidota;c__Bacteroidia;o__Cytophagales;f__Cyclobacteriaceae;g__Reichenbachiella;__	0	0	0	0	0.0128805	0	0	0.00912064	0	0	0	0	0	0.0433847	0.0561439	0.0851789	0.00778998	0	0.0719588	0	0	0	0	0	0	0	0	0	0	0.0350035	0.0520708
OTU113	d__Bacteria;p__Bacteroidota;c__Bacteroidia;o__Cytophagales;f__Cyclobacteriaceae;g__Reichenbachiella;s__Reichenbachiella_agariperforans	0	0	0	0	0	0	0	0.00781769	0	0	0.0470177	0	0	0	0	0	0	0	0	0	0	0	0	0	0	0	0	0	0	0	0
OTU114	d__Bacteria;p__Bacteroidota;c__Bacteroidia;o__Cytophagales;f__Cyclobacteriaceae;g__Reichenbachiella;s__uncultured_Bacteroidetes	0	0	0	0	0	0	0	0	0	0	0	0	0	0	0	0	0	0	0	0	0	0	0	0	0	0	0	0	0	0	0.00801089
OTU115	d__Bacteria;p__Bacteroidota;c__Bacteroidia;o__Cytophagales;f__Cyclobacteriaceae;g__Reichenbachiella;s__uncultured_Flammeovirgaceae	0.00703789	0	0	0	0	0	0	0	0	0	0	0	0	0	0.01936	0	0	0	0	0	0	0	0	0	0	0	0	0	0	0	0
OTU116	d__Bacteria;p__Bacteroidota;c__Bacteroidia;o__Cytophagales;f__Cyclobacteriaceae;g__Reichenbachiella;s__uncultured_bacterium	0.0112606	0	0	0.00622045	0	0.0269086	0	0	0	0	0	0	0	0.0166864	0.017424	0	0.01558	0	0	0	0	0	0	0	0	0	0	0	0	0	0
OTU117	d__Bacteria;p__Bacteroidota;c__Bacteroidia;o__Cytophagales;f__Cyclobacteriaceae;g__uncultured;__	0.026744	0.0350669	0	0.393962	0	0.0615053	0.089211	0.0143324	0	0	0.0156726	0.0223047	0.0436989	0.198568	0.0406559	0.383305	0	0	0.087108	0.050844	0	0	0	0	0	0.0340213	0	0	0.0547737	0.0350035	0.0440599
OTU118	d__Bacteria;p__Bacteroidota;c__Bacteroidia;o__Cytophagales;f__Cyclobacteriaceae;g__uncultured;s__uncultured_Bacteroidetes	0	0	0	0	0	0	0	0	0	0	0.00447788	0	0	0.00667456	0	0	0	0	0	0	0	0	0	0	0	0	0	0	0.0758406	0	0
OTU119	d__Bacteria;p__Bacteroidota;c__Bacteroidia;o__Cytophagales;f__Cyclobacteriaceae;g__uncultured;s__uncultured_Cytophaga	0.0197061	0.0215796	0	0	0	0	0.0167271	0	0	0.0153343	0	0.0457247	0.0364157	0.0767575	0.021296	0.110023	0	0	0.102257	0	0	0	0	0	0	0	0	0	0.0294936	0	0.0320436
OTU120	d__Bacteria;p__Bacteroidota;c__Bacteroidia;o__Cytophagales;f__Cyclobacteriaceae;g__uncultured;s__uncultured_Flexibacteraceae	0.00703789	0	0	0	0	0	0	0	0	0.0306686	0	0	0	0.0100118	0	0.0993754	0.011685	0	0	0	0	0	0	0	0	0	0	0	0	0	0
OTU121	d__Bacteria;p__Bacteroidota;c__Bacteroidia;o__Cytophagales;f__Cyclobacteriaceae;g__uncultured;s__uncultured_bacterium	0.0140758	0	0.0392479	0.064278	0	0.0192204	0	0.0117265	0	0	0	0	0	0.065077	0.269103	0.134867	0	0.0219202	0.0719588	0	0	0	0.153669	0	0	0	0	0.0352212	0	0.020002	0
OTU122	d__Bacteria;p__Bacteroidota;c__Bacteroidia;o__Cytophagales;f__Cyclobacteriaceae;g__uncultured;s__uncultured_deep-sea	0	0	0	0	0	0	0	0	0	0	0	0	0	0.00667456	0	0	0	0	0	0	0	0	0	0	0	0	0	0	0	0	0
OTU123	d__Bacteria;p__Bacteroidota;c__Bacteroidia;o__Cytophagales;f__Cyclobacteriaceae;g__uncultured;s__uncultured_marine	0	0	0	0	0	0	0	0	0	0	0	0	0	0	0.00774398	0	0	0	0	0	0	0	0	0	0	0	0	0	0	0	0
OTU124	d__Bacteria;p__Bacteroidota;c__Bacteroidia;o__Cytophagales;f__Cyclobacteriaceae;g__uncultured;s__uncultured_sediment	0.0112606	0	0	0	0.042935	0	0	0	0	0	0	0	0.0242771	0.0851007	0.0367839	0.269733	0	0	0.0340857	0	0	0	0	0	0	0	0	0	0.0252802	0	0
OTU125	d__Bacteria;p__Bacteroidota;c__Bacteroidia;o__Cytophagales;f__Flammeovirgaceae;__;__	0	0	0	0	0	0	0	0	0	0	0	0	0	0	0	0	0	0	0	0	0	0	0	0	0	0	0	0	0	0	0.0280381
OTU126	d__Bacteria;p__Bacteroidota;c__Bacteroidia;o__Cytophagales;f__Flammeovirgaceae;g__uncultured;s__Marivirga_sericea	0	0	0	0	0	0	0	0	0	0	0	0	0	0.00500592	0	0	0	0	0	0	0	0	0	0	0	0	0	0	0	0	0
OTU127	d__Bacteria;p__Bacteroidota;c__Bacteroidia;o__Cytophagales;f__Hymenobacteraceae;g__Adhaeribacter;s__uncultured_bacterium	0	0	0	0	0	0	0	0	0	0	0	0	0	0	0	0	0	0	0	0	0	0	0.115252	0	0	0	0	0	0	0	0
OTU128	d__Bacteria;p__Bacteroidota;c__Bacteroidia;o__Cytophagales;f__Hymenobacteraceae;g__Pontibacter;__	0	0	0	0	0	0	0	0	0	0	0	0	0	0	0	0	0	0	0	0	0	0	0.883596	0	0	0	0	0	0	0	0
OTU129	d__Bacteria;p__Bacteroidota;c__Bacteroidia;o__Cytophagales;f__Hymenobacteraceae;g__Pontibacter;s__Pontibacter_populi	0	0	0	0	0	0	0	0	0	0	0	0	0	0	0	0	0	0	0	0	0	0	2.26662	0	0	0	0	0	0	0	0
OTU130	d__Bacteria;p__Bacteroidota;c__Bacteroidia;o__Cytophagales;f__Microscillaceae;g__Microscilla;__	0	0	0	0	0	0	0	0	0	0	0	0	0	0	0.0967998	0	0	0	0	0	0	0	0	0	0	0	0	0	0	0	0
OTU131	d__Bacteria;p__Bacteroidota;c__Bacteroidia;o__Cytophagales;f__Microscillaceae;g__uncultured;__	0	0	0	0	0	0	0	0	0	0	0	0	0	0	0	0	0	0	0	0	0	0	0.307338	0	0	0	0	0	0	0	0
OTU132	d__Bacteria;p__Bacteroidota;c__Bacteroidia;o__Cytophagales;f__Microscillaceae;g__uncultured;s__uncultured_Flammeovirgaceae	0	0	0	0	0	0	0	0	0	0	0	0	0	0	0	0.0141965	0	0	0	0	0	0	0	0	0	0	0	0	0	0	0
OTU133	d__Bacteria;p__Bacteroidota;c__Bacteroidia;o__Cytophagales;f__Spirosomaceae;g__Taeseokella;s__Arcticibacterium_luteifluviistationis	0	0	0	0	0	0	0	0	0	0	0	0	0	0.0200237	0	0	0	0	0	0	0	0	0	0	0	0	0	0	0	0	0
OTU134	d__Bacteria;p__Bacteroidota;c__Bacteroidia;o__Cytophagales;f__Spirosomaceae;g__Taeseokella;s__Bacteroidetes_bacterium	0	0	0	0	0	0	0	0	0	0	0	0	0	0	0.00387199	0	0	0	0	0	0	0	0	0	0	0	0	0	0	0	0
OTU135	d__Bacteria;p__Bacteroidota;c__Bacteroidia;o__Flavobacteriales;__;__;__	0	0	0	0.0456167	0	0	0.189573	0	0	0.117563	0	0	0.0388434	0	0.00774398	0.0177456	0.0311599	0	0.0227238	0	0	0	0	0	0	0	0	0	0	0.135014	0
OTU136	d__Bacteria;p__Bacteroidota;c__Bacteroidia;o__Flavobacteriales;f__Crocinitomicaceae;g__Crocinitomix;__	0.0281516	0	0	0	0	0	0	0	0	0	0	0.0156133	0.0364157	0.088438	0.0348479	0.298126	0.011685	0	0	0	0	0	0	0	0	0	0	0	0	0	0.0200272
OTU137	d__Bacteria;p__Bacteroidota;c__Bacteroidia;o__Flavobacteriales;f__Crocinitomicaceae;g__Crocinitomix;s__Crocinitomix_catalasitica	0	0	0	0	0	0	0	0	0	0	0	0	0	0	0	0.0248438	0	0	0	0	0	0	0	0	0	0	0	0	0	0	0
OTU138	d__Bacteria;p__Bacteroidota;c__Bacteroidia;o__Flavobacteriales;f__Crocinitomicaceae;g__Crocinitomix;s__Crocinitomix_sp.	0	0	0	0	0	0	0	0	0	0	0	0.00111524	0	0.0166864	0	0.0390403	0	0	0.0302984	0	0	0	0	0	0	0	0	0	0	0	0
OTU139	d__Bacteria;p__Bacteroidota;c__Bacteroidia;o__Flavobacteriales;f__Crocinitomicaceae;g__Crocinitomix;s__uncultured_Bacteroidetes/Chlorobi	0	0.0836211	0	0	0.15886	0.149919	0.161695	0.00521179	0.00645891	0	0.0447788	0	0	0.0100118	0.0542079	0.0177456	0	0.0137001	0.037873	0.0610128	0.0268492	0	0	0	0.0277208	0	0.0171051	0.0352212	0	0	0.0240327
OTU140	d__Bacteria;p__Bacteroidota;c__Bacteroidia;o__Flavobacteriales;f__Crocinitomicaceae;g__Crocinitomix;s__uncultured_Crocinitomix	0.122459	0	0	0.0103674	0	0.0384408	0	0	0	0	0	0.00557619	0.0218494	0.24529	0.017424	0.184554	0	0	0.0302984	0.0406752	0.107397	0	0	0	0	0	0	0	0	0.0850085	0
OTU141	d__Bacteria;p__Bacteroidota;c__Bacteroidia;o__Flavobacteriales;f__Crocinitomicaceae;g__Crocinitomix;s__uncultured_Flavobacteriia	0	0	0	0	0	0	0	0	0	0	0	0	0	0	0	0	0	0	0.0302984	0	0	0	0	0	0	0	0	0	0	0	0
OTU142	d__Bacteria;p__Bacteroidota;c__Bacteroidia;o__Flavobacteriales;f__Crocinitomicaceae;g__Crocinitomix;s__uncultured_bacterium	0	0	0	0	0	0	0	0	0	0	0	0	0	0.00333728	0	0	0	0	0	0	0	0	0	0	0	0	0	0	0	0	0
OTU143	d__Bacteria;p__Bacteroidota;c__Bacteroidia;o__Flavobacteriales;f__Crocinitomicaceae;g__Fluviicola;__	0.0323743	0.0161847	0.00535198	0.00622045	0	0.00768817	0.0223028	0	0	0	0.00671682	0.00669142	0.0364157	0.0266983	0.0271039	0.0248438	0	0.0137001	0.0340857	0.0813504	0.0805477	0	0	0	0.0166325	0	0	0.028177	0	0.020002	0
OTU144	d__Bacteria;p__Bacteroidota;c__Bacteroidia;o__Flavobacteriales;f__Crocinitomicaceae;g__Fluviicola;s__uncultured_Bacteroidetes/Chlorobi	0	0	0	0	0	0.0345968	0	0	0	0	0	0.00557619	0	0	0	0	0	0	0	0	0	0	0	0	0	0	0	0	0	0	0
OTU145	d__Bacteria;p__Bacteroidota;c__Bacteroidia;o__Flavobacteriales;f__Crocinitomicaceae;g__Salinirepens;s__uncultured_bacterium	0	0	0	0	0	0	0	0	0	0	0	0	0	0	0	0	0	0	0.0530223	0	0	0	0	0	0	0	0.00684205	0	0	0	0
OTU146	d__Bacteria;p__Bacteroidota;c__Bacteroidia;o__Flavobacteriales;f__Crocinitomicaceae;g__uncultured;__	0	0	0	0	0	0	0	0	0	0	0	0	0	0.0250296	0	0	0	0	0	0	0	0	0	0	0	0	0	0	0	0	0
OTU147	d__Bacteria;p__Bacteroidota;c__Bacteroidia;o__Flavobacteriales;f__Crocinitomicaceae;g__uncultured;s__uncultured_Bacteroidetes	0	0	0	0	0	0	0	0	0	0	0	0	0	0.0567338	0.00967998	0.0354912	0.0272649	0	0.0340857	0	0	0	0	0	0	0	0	0	0	0	0
OTU148	d__Bacteria;p__Bacteroidota;c__Bacteroidia;o__Flavobacteriales;f__Cryomorphaceae;__;__	0	0.00809236	0	0	0	0	0	0	0	0	0	0	0	0.00500592	0	0	0	0	0	0	0	0	0	0	0	0	0	0	0	0	0
OTU149	d__Bacteria;p__Bacteroidota;c__Bacteroidia;o__Flavobacteriales;f__Cryomorphaceae;g__Cryomorpha;s__uncultured_deep-sea	0.00422274	0	0	0.0124409	0.0300545	0	0	0	0	0	0.00447788	0	0.0145663	0.041716	0.00967998	0.0851789	0	0	0.0265111	0	0	0	0	0	0	0	0	0	0	0	0
OTU150	d__Bacteria;p__Bacteroidota;c__Bacteroidia;o__Flavobacteriales;f__Cryomorphaceae;g__Cryomorpha;s__uncultured_organism	0	0	0	0	0	0	0	0	0	0	0	0	0	0	0	0.0141965	0	0	0	0	0	0	0	0	0	0	0	0	0	0	0
OTU151	d__Bacteria;p__Bacteroidota;c__Bacteroidia;o__Flavobacteriales;f__Cryomorphaceae;g__NS10_marine_group;s__uncultured_Bacteroidetes	0	0	0	0	0	0	0	0	0	0.0153343	0	0	0	0	0.00774398	0	0	0	0	0	0	0	0	0	0	0	0	0	0	0	0
OTU152	d__Bacteria;p__Bacteroidota;c__Bacteroidia;o__Flavobacteriales;f__Cryomorphaceae;g__NS10_marine_group;s__uncultured_Bacteroidetes/Chlorobi	0	0.00809236	0	0.0124409	0	0.0345968	0	0	0	0	0	0.0089219	0	0	0.00967998	0	0	0	0	0.162701	0.187945	0	0	0	0.0609858	0	0.0205262	0	0	0.150015	0
OTU153	d__Bacteria;p__Bacteroidota;c__Bacteroidia;o__Flavobacteriales;f__Cryomorphaceae;g__NS10_marine_group;s__uncultured_Flavobacteriia	0	0	0	0	0	0	0	0.0026059	0	0	0	0	0	0	0	0	0	0	0	0.122026	0	0	0	0	0.0776182	0	0	0.0316991	0	0	0
OTU154	d__Bacteria;p__Bacteroidota;c__Bacteroidia;o__Flavobacteriales;f__Cryomorphaceae;g__NS10_marine_group;s__uncultured_bacterium	0	0	0	0	0	0	0	0	0	0	0	0	0	0	0	0	0	0	0.0151492	0	0	0	0	0	0	0	0	0	0.0379203	0	0
OTU155	d__Bacteria;p__Bacteroidota;c__Bacteroidia;o__Flavobacteriales;f__Cryomorphaceae;g__Owenweeksia;__	0	0	0	0	0	0	0	0	0	0	0	0	0	0.0166864	0	0.0106474	0	0	0	0	0	0	0	0	0	0	0	0	0	0	0.00801089
OTU156	d__Bacteria;p__Bacteroidota;c__Bacteroidia;o__Flavobacteriales;f__Cryomorphaceae;g__Owenweeksia;s__uncultured_marine	0	0	0	0	0	0	0	0	0	0	0	0	0	0	0.00774398	0	0	0	0	0	0	0	0	0	0	0	0	0	0	0	0
OTU157	d__Bacteria;p__Bacteroidota;c__Bacteroidia;o__Flavobacteriales;f__Cryomorphaceae;g__Vicingus;__	0	0	0	0	0	0	0	0.00521179	0	0	0.0291062	0.0356876	0.0655483	0.0784261	0.284591	0.177456	0	0	0.124981	0	0	0	0	0.0648929	0	0	0	0	0.0842673	0.160016	0
OTU158	d__Bacteria;p__Bacteroidota;c__Bacteroidia;o__Flavobacteriales;f__Cryomorphaceae;g__Vicingus;s__uncultured_Bacteroidetes	0	0	0	0	0	0	0	0	0	0	0	0	0	0	0.0367839	0.0638842	0	0	0	0	0	0	0	0	0	0	0	0	0	0	0
OTU159	d__Bacteria;p__Bacteroidota;c__Bacteroidia;o__Flavobacteriales;f__Cryomorphaceae;g__Vicingus;s__uncultured_Cryomorphaceae	0	0	0	0	0	0	0	0	0	0	0	0	0	0.0500592	0	0	0	0	0	0	0	0	0	0	0	0	0	0	0	0	0
OTU160	d__Bacteria;p__Bacteroidota;c__Bacteroidia;o__Flavobacteriales;f__Cryomorphaceae;g__Vicingus;s__uncultured_bacterium	0	0	0	0	0	0	0	0	0	0.0255571	0	0	0.0121386	0	0	0	0.011685	0	0	0	0	0	0.345755	0	0	0	0	0	0	0	0
OTU161	d__Bacteria;p__Bacteroidota;c__Bacteroidia;o__Flavobacteriales;f__Cryomorphaceae;g__Vicingus;s__uncultured_marine	0	0	0	0	0	0.0230645	0	0	0	0	0	0	0	0	0	0	0	0	0	0	0	0	0.153669	0	0.0942507	0	0	0.0140885	0	0.030003	0
OTU162	d__Bacteria;p__Bacteroidota;c__Bacteroidia;o__Flavobacteriales;f__Cryomorphaceae;g__Vicingus;s__uncultured_sediment	0	0	0	0	0	0	0	0	0	0	0	0	0	0.0100118	0	0.0496877	0	0	0	0	0	0	0	0	0	0	0	0	0	0	0.0200272
OTU163	d__Bacteria;p__Bacteroidota;c__Bacteroidia;o__Flavobacteriales;f__Cryomorphaceae;g__uncultured;__	0.0309667	0.714825	0.101688	0.255039	0.91881	2.79465	0.975746	0.102933	0.229291	0.485586	0.776912	0.266542	0.0704037	0.55232	1.72691	0.457836	0.175275	0.449364	0.106045	0.976205	0.469862	0.169252	0.192086	0.778715	1.02013	0.215468	0.13342	0.309946	0.0252802	0.875088	0.44861
OTU164	d__Bacteria;p__Bacteroidota;c__Bacteroidia;o__Flavobacteriales;f__Cryomorphaceae;g__uncultured;s__hydrothermal_vent	0	0	0	0	0	0	0	0	0	0	0	0	0	0	0	0	0	0	0	0	0	0	0	0	0	0	0	0	0	0	0.0120163
OTU165	d__Bacteria;p__Bacteroidota;c__Bacteroidia;o__Flavobacteriales;f__Cryomorphaceae;g__uncultured;s__marine_metagenome	0.0689713	1.44314	0	0.00414697	1.4555	5.83148	0.535266	0.216289	0.387534	0.260683	1.09932	0.118215	0.11653	1.17139	4.0714	0.628194	0.14022	0.706927	0.181791	0.0711816	0	0.253879	0.614675	0.567813	0.98686	0.272171	0.160788	0.471964	0	0.0150015	0.861171
OTU166	d__Bacteria;p__Bacteroidota;c__Bacteroidia;o__Flavobacteriales;f__Cryomorphaceae;g__uncultured;s__metagenome	0	0	0	0	0	0	0	0	0	0	0	0	0	0.0100118	0	0	0	0	0.0151492	0	0	0	0	0	0	0	0	0	0	0	0
OTU167	d__Bacteria;p__Bacteroidota;c__Bacteroidia;o__Flavobacteriales;f__Cryomorphaceae;g__uncultured;s__uncultured_Bacteroidetes	0	0.0107898	0.014272	0.0228083	0.0128805	0.0576613	0.167271	0	0	0.07156	0.00895576	0.0278809	0.0145663	0	0.015488	0	0.019475	0	0	0.0305064	0	0	0	0	0.0388091	0	0	0.0176106	0	0.135014	0
OTU168	d__Bacteria;p__Bacteroidota;c__Bacteroidia;o__Flavobacteriales;f__Cryomorphaceae;g__uncultured;s__uncultured_Bacteroidetes/Chlorobi	0	0	0	0	0	0	0	0	0	0	0	0.00334571	0.00728314	0	0	0.0319421	0	0	0	0	0	0	0	0	0	0	0	0	0	0	0
OTU169	d__Bacteria;p__Bacteroidota;c__Bacteroidia;o__Flavobacteriales;f__Cryomorphaceae;g__uncultured;s__uncultured_Flavobacteriia	0	0	0.00891997	0.0331757	0	0.00768817	0.0836353	0	0.00484418	0.0562257	0.0111947	0.0156133	0.0121386	0	0.021296	0.0141965	0.01558	0	0	0	0	0	0	0	0.0443533	0	0.0102631	0.00704424	0	0.180018	0
OTU170	d__Bacteria;p__Bacteroidota;c__Bacteroidia;o__Flavobacteriales;f__Cryomorphaceae;g__uncultured;s__uncultured_Flavobacterium	0.00985305	0	0	0	0	0	0	0	0	0	0	0.0144981	0.0291326	0.088438	0	0.0958262	0	0	0.0643842	0	0	0	0.115252	0	0	0	0	0	0.0337069	0	0.036049
OTU171	d__Bacteria;p__Bacteroidota;c__Bacteroidia;o__Flavobacteriales;f__Cryomorphaceae;g__uncultured;s__uncultured_bacterium	0	0	0.00891997	0	0.025761	0.0230645	0.0167271	0	0	0.0102229	0.00895576	0.00557619	0.00485543	0.0333728	0.015488	0.152612	0.011685	0	0.0568096	0.132194	0.107397	0	0	0.0486697	0.0665299	0	0	0.0211327	0.0547737	0.110011	0.0160218
OTU172	d__Bacteria;p__Bacteroidota;c__Bacteroidia;o__Flavobacteriales;f__Cryomorphaceae;g__uncultured;s__unidentified_marine	0	0	0	0	0	0	0	0	0	0	0	0	0	0	0.00774398	0	0	0	0	0	0	0	0	0	0	0	0	0	0	0	0.0200272
OTU173	d__Bacteria;p__Bacteroidota;c__Bacteroidia;o__Flavobacteriales;f__Flavobacteriaceae;__;__	0.320928	0.482844	0.00891997	0.284067	0.712722	1.44153	0.546418	0.0938123	0.0984983	0.209569	0.537346	0.633455	0.373868	0.939445	1.85275	6.74688	0.14022	0.421964	0.484775	0.233882	0.134246	0.169252	0	2.41726	2.36181	0.102064	0.0752626	0.693857	0.695205	0.330033	0.949291
OTU174	d__Bacteria;p__Bacteroidota;c__Bacteroidia;o__Flavobacteriales;f__Flavobacteriaceae;g__Algibacter;__	0.00844547	0	0	0	0	0	0	0	0	0	0	0.0144981	0	0.0133491	0.0445279	0.330068	0	0	0	0	0	0	0	0	0	0	0	0	0	0	0
OTU175	d__Bacteria;p__Bacteroidota;c__Bacteroidia;o__Flavobacteriales;f__Flavobacteriaceae;g__Algitalea;__	0	0	0	0	0	0	0.111514	0	0	0	0	0	0	0	0	0	0	0	0	0	0	0	0	0	0	0	0	0	0	0	0
OTU176	d__Bacteria;p__Bacteroidota;c__Bacteroidia;o__Flavobacteriales;f__Flavobacteriaceae;g__Algitalea;s__uncultured_bacterium	0	0	0	0	0	0	0	0	0	0	0	0	0	0	0.00967998	0	0	0	0	0	0	0	0	0	0	0	0	0	0	0	0
OTU177	d__Bacteria;p__Bacteroidota;c__Bacteroidia;o__Flavobacteriales;f__Flavobacteriaceae;g__Aquibacter;__	0.00844547	0	0	0	0	0	0	0	0	0	0	0.0256505	0	0	0.0271039	0.209398	0	0	0	0	0	0	0	0	0	0	0	0	0	0	0
OTU178	d__Bacteria;p__Bacteroidota;c__Bacteroidia;o__Flavobacteriales;f__Flavobacteriaceae;g__Aquimarina;__	0.0422274	0	0	0	0	0	0	0	0	0	0	0	0	0.13516	0	2.49148	0	0.00822008	0.0454477	0	0	0	0	0	0	0	0	0	0	0	0
OTU179	d__Bacteria;p__Bacteroidota;c__Bacteroidia;o__Flavobacteriales;f__Flavobacteriaceae;g__Aquimarina;s__Flavobacteriaceae_bacterium	0	0	0	0	0	0	0.0334541	0	0	0.148231	0	0.0089219	0.033988	0	0.013552	0.383305	0	0	0.0984699	0	0	0	0	0	0	0	0	0	0	0	0.0200272
OTU180	d__Bacteria;p__Bacteroidota;c__Bacteroidia;o__Flavobacteriales;f__Flavobacteriaceae;g__Arcticiflavibacter;__	0	0	0	0	0	0	0	0	0	0	0	0	0	0	0	0.0461386	0	0	0	0	0	0	0	0	0	0	0	0	0	0	0
OTU181	d__Bacteria;p__Bacteroidota;c__Bacteroidia;o__Flavobacteriales;f__Flavobacteriaceae;g__Arenibacter;__	0	0	0	0	0	0	0	0	0	0	0.00895576	0	0	0	0	0	0	0	0	0	0	0	0	0	0	0	0	0	0	0	0
OTU182	d__Bacteria;p__Bacteroidota;c__Bacteroidia;o__Flavobacteriales;f__Flavobacteriaceae;g__Ascidiimonas;s__uncultured_bacterium	0	0	0	0	0	0	0	0	0	0	0	0	0	0	0	0.0461386	0	0	0	0	0	0	0	0	0	0	0	0	0	0	0
OTU183	d__Bacteria;p__Bacteroidota;c__Bacteroidia;o__Flavobacteriales;f__Flavobacteriaceae;g__Aurantivirga;__	0.0140758	0	0	0	0	0	0	0	0	0	0	0	0	0	0	0	0	0	0	0	0	0	0	0	0	0	0	0	0	0	0
OTU184	d__Bacteria;p__Bacteroidota;c__Bacteroidia;o__Flavobacteriales;f__Flavobacteriaceae;g__Aurantivirga;s__Aurantivirga_profunda	0.0112606	0	0	0	0	0	0	0	0	0	0	0	0	0	0	0.028393	0	0	0	0	0	0	0	0	0	0	0	0	0	0	0
OTU185	d__Bacteria;p__Bacteroidota;c__Bacteroidia;o__Flavobacteriales;f__Flavobacteriaceae;g__Aurantivirga;s__Polaribacter_sp.	0	0	0	0	0	0	0	0	0	0	2.37328	0	0	0	0	0	0	0	0	0	0	0	0	0	0	0	0	0	0	0	0
OTU186	d__Bacteria;p__Bacteroidota;c__Bacteroidia;o__Flavobacteriales;f__Flavobacteriaceae;g__Cellulophaga;__	0	0	0	0	0	0	0	0	0	0	0	0	0	0	0.00774398	0	0	0	0	0	0	0	0	0	0	0	0	0	0	0	0
OTU187	d__Bacteria;p__Bacteroidota;c__Bacteroidia;o__Flavobacteriales;f__Flavobacteriaceae;g__Croceibacter;s__uncultured_marine	0	0	0	0	0	0	0	0	0	0	0.00447788	0	0	0	0	0	0	0	0	0	0	0	0	0	0	0	0	0	0	0	0
OTU188	d__Bacteria;p__Bacteroidota;c__Bacteroidia;o__Flavobacteriales;f__Flavobacteriaceae;g__Croceitalea;s__uncultured_bacterium	0	0	0	0	0	0	0	0	0	0	0	0	0	0	0	0.110023	0	0	0	0	0	0	0	0	0	0	0	0	0	0	0
OTU189	d__Bacteria;p__Bacteroidota;c__Bacteroidia;o__Flavobacteriales;f__Flavobacteriaceae;g__Dokdonia;__	0.0154834	0	0	0	0	0	0	0	0	0.0153343	0	0.0256505	0.143235	0.0517279	0.12584	0.773708	0	0	0.0946826	0	0	0	0	0	0	0	0	0	0.101121	0	0.248338
OTU190	d__Bacteria;p__Bacteroidota;c__Bacteroidia;o__Flavobacteriales;f__Flavobacteriaceae;g__Dokdonia;s__uncultured_bacterium	0.00985305	0	0	0	0	0	0	0	0	0	0	0	0	0.0183551	0	0.0425894	0	0	0	0	0	0	0	0	0	0	0	0	0	0	0.0320436
OTU191	d__Bacteria;p__Bacteroidota;c__Bacteroidia;o__Flavobacteriales;f__Flavobacteriaceae;g__Flavicella;__	0	0	0	0	0	0	0	0	0	0	0	0.00223047	0	0	0	0	0	0	0	0	0	0	0	0	0	0	0	0	0	0	0
OTU192	d__Bacteria;p__Bacteroidota;c__Bacteroidia;o__Flavobacteriales;f__Flavobacteriaceae;g__Flavicella;s__uncultured_bacterium	0	0.0269745	0	0.240524	0.0944571	0.0884139	0.206301	0.0886005	0.0226062	0.07156	0.0156726	0.623418	0.293753	0.0317042	0.0542079	0.117121	0	0	0.109832	0	0	0	0.729927	0	0	0	0	0	0.168535	0.0650065	0
OTU193	d__Bacteria;p__Bacteroidota;c__Bacteroidia;o__Flavobacteriales;f__Flavobacteriaceae;g__Flavobacterium;__	0	0	0	0	0	0	0	0	0	0.0102229	0	0	0	0	0.00774398	0	0	0	0	0.142363	0	0	0	0	0	0	0	0	0	0	0
OTU194	d__Bacteria;p__Bacteroidota;c__Bacteroidia;o__Flavobacteriales;f__Flavobacteriaceae;g__Formosa;__	0	0	0.0517358	0.159658	0	0	0	0	0	0	0	0	0	0	0.0406559	0	0	0	0.0151492	0	0	0	0	0	0	0	0	0	0	0.215022	0
OTU195	d__Bacteria;p__Bacteroidota;c__Bacteroidia;o__Flavobacteriales;f__Flavobacteriaceae;g__Gilvibacter;s__uncultured_Bacteroidetes	0	0	0	0	0	0	0	0	0	0	0	0	0	0	0	0.110023	0	0	0	0	0	0	0	0	0	0	0	0	0	0	0
OTU196	d__Bacteria;p__Bacteroidota;c__Bacteroidia;o__Flavobacteriales;f__Flavobacteriaceae;g__Kordia;__	0	0	0	0	0	0	0	0	0.00645891	0	0	0.148327	0.150518	0	0	0	0	0	0	0	0	0	0.192086	0	0	0	0	0	0.0252802	0	0
OTU197	d__Bacteria;p__Bacteroidota;c__Bacteroidia;o__Flavobacteriales;f__Flavobacteriaceae;g__Kordia;s__uncultured_Flavobacteriales	0	0	0	0	0	0	0	0	0	0	0	0	0	0.0500592	0	0	0	0	0	0	0	0	0	0	0	0	0	0	0	0.060006	0
OTU198	d__Bacteria;p__Bacteroidota;c__Bacteroidia;o__Flavobacteriales;f__Flavobacteriaceae;g__Leeuwenhoekiella;__	0	0	0	0	0	0	0	0	0	0	0	0	0	0	0	0	0	0	0	0	0	0	0	0	0	0	0.00684205	0	0	0	0
OTU199	d__Bacteria;p__Bacteroidota;c__Bacteroidia;o__Flavobacteriales;f__Flavobacteriaceae;g__Lutibacter;__	0	0	0	0	0	0	0	0	0	0	0	0	0	0.0166864	0	0	0	0	0	0	0	0	0	0	0	0	0	0	0	0	0
OTU200	d__Bacteria;p__Bacteroidota;c__Bacteroidia;o__Flavobacteriales;f__Flavobacteriaceae;g__Lutimonas;__	0	0	0	0	0.017174	0	0.0446055	0	0	0	0	0	0.0194217	0.231941	0	0.141965	0.0428449	0	0	0	0	0	0.153669	0	0	0	0	0	0	0	0
OTU201	d__Bacteria;p__Bacteroidota;c__Bacteroidia;o__Flavobacteriales;f__Flavobacteriaceae;g__Maribacter;__	0.0563031	0	0	0.0331757	0.0772831	0	0.0501812	0.0026059	0	0.138009	0.073885	0.0591076	0.067976	0.0584024	0.0425919	1.66809	0.167485	0.00822008	0.219664	0	0	0	0	0	0	0	0	0	0.0252802	0.060006	0.364496
OTU202	d__Bacteria;p__Bacteroidota;c__Bacteroidia;o__Flavobacteriales;f__Flavobacteriaceae;g__Maritimimonas;s__uncultured_Bacteroidetes	0	0	0	0	0	0	0	0	0	0	0	0	0	0	0	0	0	0	0	0.0610128	0	0	0	0	0	0	0	0	0	0	0
OTU203	d__Bacteria;p__Bacteroidota;c__Bacteroidia;o__Flavobacteriales;f__Flavobacteriaceae;g__Maritimimonas;s__uncultured_marine	0.080232	0	0	0.0290288	0.042935	0.0192204	0	0	0	0.0971172	0.0223894	0.0825276	0.0922532	0.128485	0.180048	3.76207	0.0311599	0.0301403	0.0908953	0	0	0	0	0	0	0.0340213	0	0	0.0969074	0.0650065	0.224305
OTU204	d__Bacteria;p__Bacteroidota;c__Bacteroidia;o__Flavobacteriales;f__Flavobacteriaceae;g__Muricauda;__	0	0	0	0	0	0	0	0	0	0	0.0134336	0	0	0	0	0	0	0	0	0	0	0	0	0	0	0	0	0	0	0	0
OTU205	d__Bacteria;p__Bacteroidota;c__Bacteroidia;o__Flavobacteriales;f__Flavobacteriaceae;g__Muriicola;__	0	0	0	0	0	0	0	0	0	0	0	0	0	0	0	0	0	0	0	0	0	0	0.153669	0	0	0	0	0	0	0	0
OTU206	d__Bacteria;p__Bacteroidota;c__Bacteroidia;o__Flavobacteriales;f__Flavobacteriaceae;g__NS2b_marine_group;__	0	0.118688	0.0356799	0.0870863	0.210382	0.411317	0.301087	0.0195442	0.0419829	0.0613371	0.129858	0.0323419	0	0.0383787	0.712447	0.0425894	0.0662148	0.145221	0	2.32866	1.31561	0.141044	0.384172	0.45425	0.532239	0.102064	0.106052	0.28177	0	0.225023	0
OTU207	d__Bacteria;p__Bacteroidota;c__Bacteroidia;o__Flavobacteriales;f__Flavobacteriaceae;g__NS3a_marine_group;__	0	0	0	0	0	0	0	0	0	0	0	0	0	0	0	0	0	0	0	0	0	0	0	0	0	0	0	0.390955	0	0	0
OTU208	d__Bacteria;p__Bacteroidota;c__Bacteroidia;o__Flavobacteriales;f__Flavobacteriaceae;g__NS4_marine_group;s__uncultured_Bacteroidetes	0	0.113293	0.0214079	0.0704985	0.128805	0.372876	0.512963	0.026059	0.0403682	0.0817829	0.0671682	0.0490704	0.0315603	0.0350415	0.348479	0.0461386	0.112955	0.0904209	0	1.50498	1.00685	0.112835	0.461007	0.519143	0.49343	0	0.109473	0.218371	0	0.285029	0.0961307
OTU209	d__Bacteria;p__Bacteroidota;c__Bacteroidia;o__Flavobacteriales;f__Flavobacteriaceae;g__NS5_marine_group;__	0	0.0485542	0.0588718	0.194908	0.322013	0.369032	0.579872	0.0208472	0.0322945	0.224903	0.100752	0.104832	0.033988	0.0300355	0.385263	0.0532368	0.151905	0.0849408	0	0.589791	0.228219	0.0564175	0	0.243348	0.243943	0.0567022	0.0307892	0.105664	0	0.520052	0.0240327
OTU210	d__Bacteria;p__Bacteroidota;c__Bacteroidia;o__Flavobacteriales;f__Flavobacteriaceae;g__NS5_marine_group;s__seawater_metagenome	0	0.0377644	0.0214079	0.0704985	0.300545	0.157607	0.206301	0.0156354	0.0371387	0.265794	0.0425399	0.0412638	0.0315603	0.0350415	0.151008	0.102924	0.0584249	0.0383604	0	0	0	0	0	0	0.0720741	0	0	0.0457875	0	0.140014	0.0801089
OTU211	d__Bacteria;p__Bacteroidota;c__Bacteroidia;o__Flavobacteriales;f__Flavobacteriaceae;g__NS5_marine_group;s__uncultured_Cytophagales	0	0.0269745	0	0	0	0.0653494	0	0	0	0	0.0223894	0	0	0	0.0735678	0	0	0.0137001	0	0.162701	0.201369	0	0	0	0.105339	0.0793831	0.0307892	0	0	0	0
OTU212	d__Bacteria;p__Bacteroidota;c__Bacteroidia;o__Flavobacteriales;f__Flavobacteriaceae;g__Nonlabens;__	0	0	0	0.101601	0	0	0	0	0	0	0	0	0	0	0	0	0	0	0	0	0	0	0	0	0	0	0	0	0	0	0
OTU213	d__Bacteria;p__Bacteroidota;c__Bacteroidia;o__Flavobacteriales;f__Flavobacteriaceae;g__Olleya;__	0	0	0	0	0	0	0	0	0	0	0	0	0	0	0	0.0816298	0	0	0	0	0	0	0	0	0	0	0	0	0	0	0
OTU214	d__Bacteria;p__Bacteroidota;c__Bacteroidia;o__Flavobacteriales;f__Flavobacteriaceae;g__Polaribacter;__	0.260402	4.03809	0.690406	2.37621	7.80559	14.4807	11.4413	0.831281	1.46617	6.95666	3.03824	2.08438	1.42264	2.38449	15.7087	3.75852	2.05266	3.60313	0.624905	7.952	4.24218	1.77715	5.03265	6.50552	6.39796	1.62168	1.72762	2.85996	0.286509	11.3361	2.203
OTU215	d__Bacteria;p__Bacteroidota;c__Bacteroidia;o__Flavobacteriales;f__Flavobacteriaceae;g__Postechiella;__	0	0	0	0	0	0	0	0	0	0	0	0	0	0.0150178	0	0	0	0	0	0	0	0	0	0	0	0	0	0	0	0	0
OTU216	d__Bacteria;p__Bacteroidota;c__Bacteroidia;o__Flavobacteriales;f__Flavobacteriaceae;g__Postechiella;s__uncultured_bacterium	0	0	0	0	0	0	0	0	0	0	0	0	0	0.0634084	0	0	0	0	0	0	0	0	0	0	0	0	0	0	0	0	0
OTU217	d__Bacteria;p__Bacteroidota;c__Bacteroidia;o__Flavobacteriales;f__Flavobacteriaceae;g__Pricia;s__uncultured_bacterium	0	0	0	0	0	0	0	0	0	0	0	0	0	0	0.00967998	0	0	0	0	0	0	0	0	0	0	0	0	0	0	0	0
OTU218	d__Bacteria;p__Bacteroidota;c__Bacteroidia;o__Flavobacteriales;f__Flavobacteriaceae;g__Pseudofulvibacter;__	0	0	0	0	0.034348	0	0	0	0	0	0	0	0	0	0	0	0	0	0	0	0	0	0	0	0	0	0	0	0.046347	0	0
OTU219	d__Bacteria;p__Bacteroidota;c__Bacteroidia;o__Flavobacteriales;f__Flavobacteriaceae;g__Pseudofulvibacter;s__uncultured_Flavobacteriaceae	0.0140758	0	0	0.0311023	0	0	0	0	0	0	0	0	0	0.0967812	0.011616	0.060335	0	0	0.0530223	0	0	0.141044	0	0	0	0	0	0	0	0	0
OTU220	d__Bacteria;p__Bacteroidota;c__Bacteroidia;o__Flavobacteriales;f__Flavobacteriaceae;g__Pseudofulvibacter;s__uncultured_bacterium	0	0	0	0	0	0	0	0.00390885	0	0	0	0	0	0.00500592	0.015488	0.060335	0	0	0	0	0	0	0	0	0	0	0	0	0	0	0
OTU221	d__Bacteria;p__Bacteroidota;c__Bacteroidia;o__Flavobacteriales;f__Flavobacteriaceae;g__Pseudozobellia;s__uncultured_bacterium	0	0	0	0	0	0	0	0	0	0	0	0	0.016994	0.0383787	0.01936	0.12067	0.0233699	0	0	0	0	0	0	0	0	0	0	0	0	0	0
OTU222	d__Bacteria;p__Bacteroidota;c__Bacteroidia;o__Flavobacteriales;f__Flavobacteriaceae;g__Psychroserpens;__	0	0	0	0.0311023	0.034348	0	0	0	0	0	0	0	0	0.0784261	0.0251679	0.340716	0	0	0	0	0	0	0	0	0	0	0	0	0.101121	0	0
OTU223	d__Bacteria;p__Bacteroidota;c__Bacteroidia;o__Flavobacteriales;f__Flavobacteriaceae;g__Salinimicrobium;__	0	0	0	0	0	0	0	0	0	0	0	0	0	0	0	0	0	0	0	0	0	0	1.03726	0	0	0	0	0	0	0	0
OTU224	d__Bacteria;p__Bacteroidota;c__Bacteroidia;o__Flavobacteriales;f__Flavobacteriaceae;g__Salinimicrobium;s__uncultured_soil	0	0	0	0	0	0	0	0	0	0	0	0	0	0	0	0	0	0	0	0	0	0	2.11295	0	0	0	0	0	0	0	0
OTU225	d__Bacteria;p__Bacteroidota;c__Bacteroidia;o__Flavobacteriales;f__Flavobacteriaceae;g__Spongiimicrobium;__	0	0	0	0	0	0	0	0	0	0	0	0	0	0	0	0.0674333	0	0	0	0	0	0	0	0	0	0	0	0	0	0	0
OTU226	d__Bacteria;p__Bacteroidota;c__Bacteroidia;o__Flavobacteriales;f__Flavobacteriaceae;g__Tenacibaculum;__	0.0225213	0	0	0	0.0472285	0	0	0	0	0	0	0	0.0412712	0.0383787	0	0.184554	0	0.189062	0	0	0.0939723	0	0	0	0	0	0	0	0.0252802	0.0350035	0.0520708
OTU227	d__Bacteria;p__Bacteroidota;c__Bacteroidia;o__Flavobacteriales;f__Flavobacteriaceae;g__Ulvibacter;__	0.0619334	0	0	0.0145144	0.103044	0	0	0	0	0	0.0291062	0.0613381	0.145663	0.236947	0.0290399	1.31317	0.14801	0	0.0719588	0	0	0	0	0	0	0	0	0	0.0547737	0	0
OTU228	d__Bacteria;p__Bacteroidota;c__Bacteroidia;o__Flavobacteriales;f__Flavobacteriaceae;g__Ulvibacter;s__Ulvibacter_marinus	0	0	0	0	0	0	0	0	0	0	0	0	0	0	0	0.0816298	0	0	0	0	0	0	0	0	0	0	0	0	0	0	0
OTU229	d__Bacteria;p__Bacteroidota;c__Bacteroidia;o__Flavobacteriales;f__Flavobacteriaceae;g__Ulvibacter;s__uncultured_bacterium	0	0	0	0	0	0	0	0	0	0	0	0	0	0	0.023232	0.110023	0	0	0	0	0	0	0	0	0	0	0	0	0	0	0
OTU230	d__Bacteria;p__Bacteroidota;c__Bacteroidia;o__Flavobacteriales;f__Flavobacteriaceae;g__Ulvibacter;s__uncultured_marine	0.00422274	0.234678	0.183751	0.344198	0.231849	0.492043	0.551993	0.0312708	0.0468271	0.230014	0.201505	0.0925647	0.0606929	0.128485	0.600159	0.138416	0.253174	0.172622	0	1.19992	0.550409	1.38223	1.57511	3.2122	2.79426	0.567022	0.821046	1.42646	0.0842673	2.77028	0.156212
OTU231	d__Bacteria;p__Bacteroidota;c__Bacteroidia;o__Flavobacteriales;f__Flavobacteriaceae;g__Wenyingzhuangia;__	0	0	0	0	5.40981	0	0	0	0.00484418	26.9935	0	0	30.4533	0	0.01936	2.73992	0.0895848	0	0	0	0	0	0	0	0	0	0	0	0	0	0.0841144
OTU232	d__Bacteria;p__Bacteroidota;c__Bacteroidia;o__Flavobacteriales;f__Flavobacteriaceae;g__Winogradskyella;__	0	0	0	0	0	0	0	0.00651474	0	0.0306686	0.0223894	0	0	0.108462	0.023232	1.76036	0	0	0	0	0	0	0	0	0	0	0	0	0.0716272	0.0350035	0.244332
OTU233	d__Bacteria;p__Bacteroidota;c__Bacteroidia;o__Flavobacteriales;f__Flavobacteriaceae;g__uncultured;__	0	0.0161847	0	0.0186614	0	0	0.089211	0	0	0	0.0537346	0.0401485	0.0776869	0.0634084	0.011616	4.39026	0	0	0.147705	0	0	0	0	0	0	0	0	0	0.0674138	0	0.0520708
OTU234	d__Bacteria;p__Bacteroidota;c__Bacteroidia;o__Flavobacteriales;f__Flavobacteriaceae;g__uncultured;s__Saonia_flava	0	0	0	0	0	0	0	0	0	0	0.00671682	0	0	0	0	0	0	0	0	0	0	0	0	0	0	0	0	0	0	0	0
OTU235	d__Bacteria;p__Bacteroidota;c__Bacteroidia;o__Flavobacteriales;f__Flavobacteriaceae;g__uncultured;s__bacterium_SS9.17	0.00703789	0	0	0	0	0	0	0	0	0	0	0.00446095	0	0.0166864	0.015488	0.141965	0	0	0	0	0	0	0	0	0	0	0	0	0	0	0
OTU236	d__Bacteria;p__Bacteroidota;c__Bacteroidia;o__Flavobacteriales;f__Flavobacteriaceae;g__uncultured;s__uncultured_Lutibacter	0.0337819	0	0	0.0311023	0	0	0	0	0	0	0	0.0223047	0	0.13516	0.0309759	0.0532368	0	0	0.0719588	0	0	0	0	0	0	0	0	0	0	0	0
OTU237	d__Bacteria;p__Bacteroidota;c__Bacteroidia;o__Flavobacteriales;f__Flavobacteriaceae;g__uncultured;s__uncultured_marine	0	0.0701338	0.130232	0.290288	0	0.107634	0.395874	0	0.017762	0.270906	0.0559735	0.111524	0.0922532	0.0400474	0.0774398	0.166809	0.225909	0.0548005	0	0	0	0	0	0	0	0	0	0	0	0.320032	0
OTU238	d__Bacteria;p__Bacteroidota;c__Bacteroidia;o__Flavobacteriales;f__NS7_marine_group;g__NS7_marine_group;s__seawater_metagenome	0	0	0.0178399	0.105748	0	0.0115323	0.0501812	0	0	0	0	0.0156133	0	0	0	0	0	0	0	0	0	0	0	0	0	0	0	0	0	0.455046	0
OTU239	d__Bacteria;p__Bacteroidota;c__Bacteroidia;o__Flavobacteriales;f__NS7_marine_group;g__NS7_marine_group;s__uncultured_bacterium	0	0	0	0	0	0	0	0	0	0	0	0	0.00728314	0	0.015488	0	0	0	0	0	0.0805477	0	0	0	0	0	0.0136841	0	0	0	0
OTU240	d__Bacteria;p__Bacteroidota;c__Bacteroidia;o__Flavobacteriales;f__NS7_marine_group;g__NS7_marine_group;s__uncultured_marine	0	0	0	0	0	0	0	0	0	0	0	0	0	0	0	0	0	0	0	0	0	0	0	0	0	0	0	0	0	0.185019	0
OTU241	d__Bacteria;p__Bacteroidota;c__Bacteroidia;o__Flavobacteriales;f__NS9_marine_group;g__NS9_marine_group;__	0	0.142965	0.0874157	0.170026	0.042935	0.372876	0.24533	0.00781769	0.0193767	0.03578	0.0447788	0.0390333	0.0121386	0.0600711	0.197472	0.0425894	0.0506349	0.0575406	0.0151492	0.711816	0.281917	0.0846262	0.307338	0.113563	0.0776182	0.102064	0.0649995	0.0774866	0.0294936	1.66517	0.0841144
OTU242	d__Bacteria;p__Bacteroidota;c__Bacteroidia;o__Flavobacteriales;f__NS9_marine_group;g__NS9_marine_group;s__hydrothermal_vent	0	0.0188822	0	0	0.0214675	0.0845698	0	0	0.00645891	0.0255571	0.0179115	0.0089219	0	0.00834321	0.0367839	0	0.01558	0.0219202	0	0.0406752	0.0671231	0	0	0	0.0443533	0.0793831	0.0136841	0	0	0.040004	0
OTU243	d__Bacteria;p__Bacteroidota;c__Bacteroidia;o__Flavobacteriales;f__NS9_marine_group;g__NS9_marine_group;s__seawater_metagenome	0	0.0215796	0.00891997	0.0165879	0	0.0576613	0.0111514	0.00651474	0	0	0	0	0	0	0.00774398	0	0	0	0	0	0.0939723	0	0	0	0	0	0	0	0	0.110011	0
OTU244	d__Bacteria;p__Bacteroidota;c__Bacteroidia;o__Flavobacteriales;f__NS9_marine_group;g__NS9_marine_group;s__uncultured_Flavobacterium	0.00281516	0	0	0	0	0	0	0	0	0	0	0	0	0	0	0	0	0	0	0	0	0	0	0	0	0	0	0	0	0	0
OTU245	d__Bacteria;p__Bacteroidota;c__Bacteroidia;o__Flavobacteriales;f__NS9_marine_group;g__NS9_marine_group;s__uncultured_marine	0	0	0	0	0	0	0	0	0	0	0	0.00557619	0	0	0.00580799	0	0	0	0	0	0	0	0	0	0	0	0	0.0140885	0	0.0450045	0
OTU246	d__Bacteria;p__Bacteroidota;c__Bacteroidia;o__Flavobacteriales;f__Schleiferiaceae;g__Schleiferia;__	0.00281516	0	0	0	0	0	0	0	0	0	0	0	0	0	0.00774398	0	0	0	0	0	0	0	0	0	0	0	0	0	0	0	0
OTU247	d__Bacteria;p__Bacteroidota;c__Bacteroidia;o__Flavobacteriales;f__Schleiferiaceae;g__Schleiferia;s__uncultured_Bacteroidetes	0	0	0	0	0	0	0	0	0	0	0	0	0	0.023361	0.011616	0.127768	0	0	0	0	0	0	0	0	0	0	0	0	0	0	0.0120163
OTU248	d__Bacteria;p__Bacteroidota;c__Bacteroidia;o__Flavobacteriales;f__Schleiferiaceae;g__Schleiferia;s__uncultured_deep-sea	0	0	0	0	0	0	0	0	0	0	0	0	0	0.0150178	0	0.0425894	0	0	0	0	0	0	0	0	0	0	0	0	0	0	0
OTU249	d__Bacteria;p__Bacteroidota;c__Bacteroidia;o__Flavobacteriales;f__Weeksellaceae;g__Chryseobacterium;__	0	0	0	0	0	0	0	0	0	0	0	0	0	0	0	0	0	0	0	0.0915192	0	0	0	0	0	0	0	0	0	0	0
OTU250	d__Bacteria;p__Bacteroidota;c__Bacteroidia;o__Sphingobacteriales;f__FFCH9454;g__FFCH9454;s__uncultured_Bacteroidetes	0	0	0	0	0	0	0	0	0	0	0	0	0	0	0.00387199	0	0	0	0	0	0	0	0	0	0	0	0	0	0	0	0
OTU251	d__Bacteria;p__Bacteroidota;c__Bacteroidia;o__Sphingobacteriales;f__Lentimicrobiaceae;g__Lentimicrobiaceae;__	0	0	0	0	0	0	0	0	0	0	0	0	0	0	0	0	0	0	0	0.0305064	0	0	0	0	0	0	0	0	0	0	0
OTU252	d__Bacteria;p__Bacteroidota;c__Bacteroidia;o__Sphingobacteriales;f__Lentimicrobiaceae;g__Lentimicrobiaceae;s__marine_metagenome	0	0	0	0	0	0	0	0	0	0	0	0	0.00971086	0	0	0	0	0	0	0	0	0	0	0	0	0	0	0	0	0	0
OTU253	d__Bacteria;p__Bacteroidota;c__Bacteroidia;o__Sphingobacteriales;f__NS11-12_marine_group;g__NS11-12_marine_group;__	0	0	0	0	0	0	0	0	0	0	0.00671682	0	0	0.0166864	0	0.127768	0	0	0	0	0	0	0.0768344	0	0	0	0	0	0	0	0
OTU254	d__Bacteria;p__Bacteroidota;c__Bacteroidia;o__Sphingobacteriales;f__NS11-12_marine_group;g__NS11-12_marine_group;s__uncultured_Bacteroidetes	0	0	0	0	0	0	0	0	0	0	0.00895576	0	0	0	0	0.0212947	0	0	0	0	0	0	0	0	0	0	0	0	0	0	0
OTU255	d__Bacteria;p__Bacteroidota;c__Bacteroidia;o__Sphingobacteriales;f__NS11-12_marine_group;g__NS11-12_marine_group;s__uncultured_bacterium	0	0	0	0	0	0	0	0	0	0	0	0	0	0.00834321	0	0.00709824	0	0	0	0	0	0	0	0	0	0	0	0	0	0	0
OTU256	d__Bacteria;p__Bacteroidota;c__Bacteroidia;o__Sphingobacteriales;f__NS11-12_marine_group;g__NS11-12_marine_group;s__uncultured_marine	0	0.00809236	0	0	0	0.0230645	0.0390298	0	0	0	0	0	0	0.0350415	0.0271039	0.0638842	0	0	0	0	0	0	0	0	0	0	0	0	0	0	0
OTU257	d__Bacteria;p__Bacteroidota;c__Bacteroidia;o__Sphingobacteriales;f__NS11-12_marine_group;g__NS11-12_marine_group;s__unidentified_marine	0	0	0	0	0	0	0	0	0	0	0	0	0	0	0	0	0	0	0	0	0	0	0	0	0	0	0	0	0	0.0250025	0
OTU258	d__Bacteria;p__Bacteroidota;c__Bacteroidia;o__Sphingobacteriales;f__Sphingobacteriaceae;g__Pedobacter;__	0	0	0	0	0	0	0	0	0	0	0	0	0	0	0	0	0	0	0	0.0406752	0	0	0	0	0	0	0	0	0	0	0
OTU259	d__Bacteria;p__Bacteroidota;c__Ignavibacteria;o__Ignavibacteriales;f__Melioribacteraceae;g__IheB3-7;s__uncultured_Chlorobi	0	0	0	0	0	0	0	0	0	0	0	0	0	0	0	0	0	0	0	0.050844	0	0	0	0	0	0	0	0	0	0	0
OTU260	d__Bacteria;p__Bacteroidota;c__Kapabacteria;o__Kapabacteriales;f__Kapabacteriales;g__Kapabacteriales;__	0	0	0	0	0	0	0	0	0	0	0	0	0	0.023361	0	0	0	0	0	0	0	0	0	0	0	0	0	0	0	0	0
OTU261	d__Bacteria;p__Bacteroidota;c__Kapabacteria;o__Kapabacteriales;f__Kapabacteriales;g__Kapabacteriales;s__uncultured_bacterium	0	0	0	0	0	0	0	0	0	0	0	0	0	0	0.00387199	0	0	0	0	0.0406752	0	0	0	0	0	0	0	0	0	0	0
OTU262	d__Bacteria;p__Bacteroidota;c__Rhodothermia;o__Balneolales;f__Balneolaceae;__;__	0	0	0	0	0	0	0	0	0	0	0	0	0	0	0	0	0	0	0	0	0	0	0.153669	0	0	0	0	0	0	0	0
OTU263	d__Bacteria;p__Bacteroidota;c__Rhodothermia;o__Balneolales;f__Balneolaceae;g__B2706-C7;__	0.00422274	0	0	0	0	0	0	0	0	0	0	0	0	0	0.00580799	0.0177456	0	0	0	0	0	0	0	0	0	0	0	0	0	0	0
OTU264	d__Bacteria;p__Bacteroidota;c__Rhodothermia;o__Balneolales;f__Balneolaceae;g__Balneola;__	0	0	0	0	0	0	0	0.0130295	0	0	0.0604514	0	0	0	0	0	0	0	0	0	0	0	0	0	0	0	0	0	0	0	0
OTU265	d__Bacteria;p__Bacteroidota;c__Rhodothermia;o__Balneolales;f__Balneolaceae;g__Gracilimonas;__	0	0	0	0	0	0	0	0	0	0	0	0	0	0	0	0	0	0	0	0.0305064	0	0	0	0	0	0	0	0	0	0	0
OTU266	d__Bacteria;p__Bacteroidota;c__Rhodothermia;o__Rhodothermales;f__Rhodothermaceae;__;__	0	0	0	0	0	0	0	0	0	0	0	0	0	0.00500592	0	0	0	0	0	0	0	0	0	0	0	0	0	0	0	0	0
OTU267	d__Bacteria;p__Bacteroidota;c__Rhodothermia;o__Rhodothermales;f__Rhodothermaceae;g__uncultured;__	0	0	0	0	0	0	0	0	0	0	0	0	0	0.00500592	0	0.0141965	0	0	0	0	0	0	0	0	0	0	0	0	0	0	0.0240327
OTU268	d__Bacteria;p__Bacteroidota;c__Rhodothermia;o__Rhodothermales;f__Rhodothermaceae;g__uncultured;s__uncultured_Bacteroidales	0	0	0	0	0	0	0	0	0	0	0	0	0	0.00834321	0	0.0141965	0	0	0.0113619	0	0	0	0	0	0	0	0	0	0	0	0
OTU269	d__Bacteria;p__Bacteroidota;c__Rhodothermia;o__Rhodothermales;f__Rhodothermaceae;g__uncultured;s__uncultured_bacterium	0	0	0	0	0	0	0	0	0	0	0	0	0	0.0116805	0.021296	0.0461386	0	0	0.0265111	0.0406752	0	0	0	0	0	0	0	0	0	0	0
OTU270	d__Bacteria;p__Bacteroidota;c__Rhodothermia;o__Rhodothermales;f__Rhodothermaceae;g__uncultured;s__uncultured_deep-sea	0	0	0	0	0	0	0	0	0	0	0	0	0	0.00333728	0	0	0	0	0	0	0	0	0	0	0	0	0	0	0	0	0
OTU271	d__Bacteria;p__Bdellovibrionota;c__Bdellovibrionia;o__Bacteriovoracales;f__Bacteriovoracaceae;__;__	0	0	0	0	0	0	0	0	0	0	0.188071	0.00223047	0.00485543	0.00500592	0.00774398	0	0	0	0	0	0	0	0	0	0	0	0	0	0	0	0
OTU272	d__Bacteria;p__Bdellovibrionota;c__Bdellovibrionia;o__Bacteriovoracales;f__Bacteriovoracaceae;g__Halobacteriovorax;s__uncultured_bacterium	0	0	0	0	0	0	0.0223028	0	0	0	0	0	0	0	0.00387199	0	0	0	0	0	0	0	0	0	0	0	0	0	0	0	0
OTU273	d__Bacteria;p__Bdellovibrionota;c__Bdellovibrionia;o__Bacteriovoracales;f__Bacteriovoracaceae;g__Halobacteriovorax;s__uncultured_sediment	0	0	0	0	0	0	0	0	0	0	0	0	0	0	0	0	0	0	0	0.0203376	0	0	0	0	0	0	0	0	0	0	0
OTU274	d__Bacteria;p__Bdellovibrionota;c__Bdellovibrionia;o__Bacteriovoracales;f__Bacteriovoracaceae;g__Peredibacter;__	0	0	0	0	0	0	0	0	0	0	0.00895576	0.00557619	0.00971086	0	0.015488	0.0141965	0	0	0	0	0	0	0.115252	0	0	0	0	0	0	0	0
OTU275	d__Bacteria;p__Bdellovibrionota;c__Bdellovibrionia;o__Bacteriovoracales;f__Bacteriovoracaceae;g__Peredibacter;s__uncultured_Peredibacter	0	0	0	0	0	0	0	0	0	0	0	0	0	0	0	0	0	0	0	0	0	0	0	0	0	0	0	0.0140885	0	0	0
OTU276	d__Bacteria;p__Bdellovibrionota;c__Bdellovibrionia;o__Bacteriovoracales;f__Bacteriovoracaceae;g__Peredibacter;s__uncultured_bacterium	0	0	0	0	0	0	0	0	0	0	0	0	0	0.00667456	0	0	0	0	0	0	0	0	0	0	0	0	0	0	0	0	0
OTU277	d__Bacteria;p__Bdellovibrionota;c__Bdellovibrionia;o__Bacteriovoracales;f__Bacteriovoracaceae;g__Peredibacter;s__uncultured_marine	0	0	0	0	0	0	0	0	0	0	0	0	0	0	0	0	0	0	0	0	0	0	0	0	0	0	0	0	0.0126401	0	0
OTU278	d__Bacteria;p__Bdellovibrionota;c__Bdellovibrionia;o__Bacteriovoracales;f__Bacteriovoracaceae;g__uncultured;__	0	0	0	0	0	0.0115323	0	0	0	0	0	0	0	0	0	0	0	0	0	0	0	0	0	0	0	0	0	0	0.0252802	0	0
OTU279	d__Bacteria;p__Bdellovibrionota;c__Bdellovibrionia;o__Bacteriovoracales;f__Bacteriovoracaceae;g__uncultured;s__uncultured_bacterium	0	0	0	0	0	0	0	0	0	0	0	0	0	0	0	0	0	0	0	0	0	0	0	0	0	0	0	0	0.0126401	0	0
OTU280	d__Bacteria;p__Bdellovibrionota;c__Bdellovibrionia;o__Bdellovibrionales;f__Bdellovibrionaceae;g__Bdellovibrio;__	0	0.00809236	0.010704	0	0	0.0384408	0	0	0	3.60867	0	0.00223047	0.0364157	0	0	0.0106474	0.0817948	0.112341	0.0643842	0	0	0	0	0	0	0.0453618	0.509733	0.295858	0	0	0
OTU281	d__Bacteria;p__Bdellovibrionota;c__Bdellovibrionia;o__Bdellovibrionales;f__Bdellovibrionaceae;g__Bdellovibrio;s__uncultured_bacterium	0	0	0	0	0	0	0	0	0	0	0.00895576	0.00223047	0	0	0	0	0	0	0	0	0	0	0	0	0	0	0	0.0140885	0	0	0
OTU282	d__Bacteria;p__Bdellovibrionota;c__Bdellovibrionia;o__Bdellovibrionales;f__Bdellovibrionaceae;g__Bdellovibrio;s__uncultured_delta	0	0	0	0	0	0	0	0	0	0	0	0	0	0	0	0	0	0.00548005	0	0	0	0	0	0	0	0	0	0	0	0	0
OTU283	d__Bacteria;p__Bdellovibrionota;c__Bdellovibrionia;o__Bdellovibrionales;f__Bdellovibrionaceae;g__Bdellovibrio;s__uncultured_marine	0	0	0	0	0	0	0	0	0	0	0	0	0	0.00667456	0	0	0	0	0	0	0	0	0	0	0	0	0	0	0	0	0
OTU284	d__Bacteria;p__Bdellovibrionota;c__Bdellovibrionia;o__Bdellovibrionales;f__Bdellovibrionaceae;g__OM27_clade;__	0	0	0	0	0	0	0	0	0	0	0	0	0.00485543	0.00667456	0.011616	0.00709824	0	0	0	0	0	0	0	0	0	0	0	0	0	0	0
OTU285	d__Bacteria;p__Bdellovibrionota;c__Bdellovibrionia;o__Bdellovibrionales;f__Bdellovibrionaceae;g__OM27_clade;s__uncultured_bacterium	0	0	0	0	0	0	0	0	0	0	0	0	0	0.00500592	0.00387199	0.028393	0	0	0	0	0	0	0	0	0	0	0	0	0	0	0
OTU286	d__Bacteria;p__Bdellovibrionota;c__Oligoflexia;o__0319-6G20;f__0319-6G20;g__0319-6G20;__	0	0	0	0	0	0	0	0	0	0	0	0	0	0	0	0.00709824	0	0	0	0	0	0	0	0	0	0	0	0	0	0	0
OTU287	d__Bacteria;p__Bdellovibrionota;c__Oligoflexia;o__0319-6G20;f__0319-6G20;g__0319-6G20;s__uncultured_bacterium	0	0	0	0	0	0	0	0	0	0	0	0	0	0	0.00774398	0	0	0	0	0	0	0	0	0	0	0	0	0	0	0	0
OTU288	d__Bacteria;p__Bdellovibrionota;c__Oligoflexia;o__Oligoflexales;f__Oligoflexales;g__Pseudobacteriovorax;s__uncultured_delta	0	0	0	0	0	0	0	0	0	0	0	0	0	0	0	0	0	0	0	0.0203376	0	0	0	0	0	0	0	0	0	0	0
OTU289	d__Bacteria;p__Bdellovibrionota;c__Oligoflexia;o__Oligoflexales;f__uncultured;g__uncultured;s__uncultured_bacterium	0	0	0	0	0	0	0	0	0	0	0.00895576	0	0	0.0133491	0	0	0	0	0	0	0	0	0	0	0	0	0	0	0	0	0
OTU290	d__Bacteria;p__Calditrichota;c__Calditrichia;o__Calditrichales;f__Calditrichaceae;__;__	0	0	0	0	0	0	0	0	0	0	0	0	0	0	0	0	0	0	0.0151492	0	0	0	0	0	0	0	0	0	0	0	0
OTU291	d__Bacteria;p__Calditrichota;c__Calditrichia;o__Calditrichales;f__Calditrichaceae;g__Calditrichaceae;s__uncultured_Deferribacteres	0	0	0	0	0	0	0	0	0	0	0	0	0	0	0	0	0	0	0	0.0203376	0	0	0.0768344	0	0	0	0	0	0	0	0
OTU292	d__Bacteria;p__Calditrichota;c__Calditrichia;o__Calditrichales;f__Calditrichaceae;g__SM23-31;__	0	0	0	0	0	0	0	0	0	0	0	0	0	0	0	0	0	0	0	0	0	0	0.0768344	0	0	0	0	0	0	0	0
OTU293	d__Bacteria;p__Campilobacterota;c__Campylobacteria;o__Campylobacterales;f__Arcobacteraceae;__;__	0	0	0	0	0	0	0	0	0	0	0	0	0	0	0	0	0	0	0	0	0	0	0	0	0	0	0	0	0.0126401	0	0
OTU294	d__Bacteria;p__Campilobacterota;c__Campylobacteria;o__Campylobacterales;f__Arcobacteraceae;g__uncultured;__	0	0	0	0	0	0	0	0	0	0	0	0	0	0	0	0	0	0	0.0265111	0.0203376	0	0	0	0	0	0	0	0	0	0	0
OTU295	d__Bacteria;p__Campilobacterota;c__Campylobacteria;o__Campylobacterales;f__Sulfurimonadaceae;g__Sulfurimonas;s__bacterium_enrichment	0	0	0	0	0	0	0	0	0	0	0	0	0	0.00333728	0	0	0	0	0	0	0	0	0	0	0	0	0	0	0	0	0
OTU296	d__Bacteria;p__Chloroflexi;c__Anaerolineae;__;__;__;__	0	0	0	0	0	0	0	0	0	0	0	0	0	0	0	0	0	0	0	0	0	0	0.0768344	0	0	0	0	0	0	0	0
OTU297	d__Bacteria;p__Chloroflexi;c__Anaerolineae;o__Ardenticatenales;f__uncultured;g__uncultured;__	0.00563031	0	0	0	0	0	0	0	0	0	0	0.00446095	0	0.00667456	0.00774398	0.0248438	0	0	0	0	0	0	0	0	0	0	0	0	0	0	0
OTU298	d__Bacteria;p__Chloroflexi;c__Anaerolineae;o__Ardenticatenales;f__uncultured;g__uncultured;s__uncultured_bacterium	0	0	0	0	0	0	0	0	0	0	0	0	0	0	0	0	0	0	0	0	0	0	0	0	0	0	0	0	0	0.030003	0.00801089
OTU299	d__Bacteria;p__Chloroflexi;c__Anaerolineae;o__Caldilineales;f__Caldilineaceae;g__Caldilineaceae;s__uncultured_bacterium	0	0	0.00356799	0	0	0	0	0	0	0	0	0	0	0	0	0	0	0	0	0	0	0	0	0	0	0	0	0	0	0	0
OTU300	d__Bacteria;p__Chloroflexi;c__Anaerolineae;o__Caldilineales;f__Caldilineaceae;g__uncultured;s__uncultured_bacterium	0	0	0	0	0	0	0	0	0	0	0	0	0	0	0	0	0.00778998	0	0	0	0	0	0	0	0	0	0	0	0	0	0
OTU301	d__Bacteria;p__Chloroflexi;c__Anaerolineae;o__SBR1031;f__A4b;g__A4b;__	0	0	0	0	0	0	0	0	0	0	0	0	0	0	0	0	0	0	0.0113619	0	0	0	0	0	0	0	0	0	0	0	0
OTU302	d__Bacteria;p__Chloroflexi;c__Anaerolineae;o__SBR1031;f__A4b;g__A4b;s__uncultured_Chloroflexi	0.0197061	0	0	0	0	0	0	0	0	0	0	0	0	0.00667456	0	0.0248438	0	0	0.0189365	0	0	0	0	0	0	0	0	0	0	0	0
OTU303	d__Bacteria;p__Chloroflexi;c__Anaerolineae;o__SBR1031;f__SBR1031;g__SBR1031;s__uncultured_microorganism	0	0	0	0	0	0	0	0	0	0	0	0	0	0	0	0	0	0	0	0.0305064	0	0	0	0	0	0	0	0	0	0	0
OTU304	d__Bacteria;p__Chloroflexi;c__Dehalococcoidia;o__SAR202_clade;f__SAR202_clade;g__SAR202_clade;__	0	0	0	0	0	0	0	0	0	0	0	0	0	0.00667456	0	0	0	0	0	0	0	0	0	0	0	0	0	0	0	0	0
OTU305	d__Bacteria;p__Chloroflexi;c__JG30-KF-CM66;o__JG30-KF-CM66;f__JG30-KF-CM66;g__JG30-KF-CM66;__	0	0	0	0	0	0	0	0	0	0	0	0	0	0	0	0	0	0	0.00757461	0	0	0	0	0	0	0	0	0	0	0	0
OTU306	d__Bacteria;p__Dadabacteria;c__Dadabacteriia;o__Dadabacteriales;f__Dadabacteriales;g__Dadabacteriales;s__uncultured_bacterium	0	0	0	0	0	0	0	0	0	0	0	0	0	0	0.00387199	0.0212947	0	0	0	0	0	0	0	0	0	0	0	0	0	0	0
OTU307	d__Bacteria;p__Dadabacteria;c__Dadabacteriia;o__Dadabacteriales;f__Dadabacteriales;g__Dadabacteriales;s__uncultured_organism	0	0	0	0	0	0	0	0	0	0	0	0	0	0.0100118	0	0.0851789	0	0	0	0	0	0	0	0	0	0	0	0	0	0	0
OTU308	d__Bacteria;p__Deinococcota;c__Deinococci;o__Deinococcales;f__Trueperaceae;g__Truepera;__	0	0	0	0	0	0	0	0	0	0	0	0	0	0	0	0	0	0	0	0	0	0	0.461007	0	0	0	0	0	0	0	0
OTU309	d__Bacteria;p__Deinococcota;c__Deinococci;o__Deinococcales;f__Trueperaceae;g__Truepera;s__uncultured_bacterium	0	0	0	0	0	0	0	0	0	0	0	0	0	0	0.00774398	0	0	0	0	0	0	0	0	0	0	0	0	0	0	0	0
OTU310	d__Bacteria;p__Desulfobacterota;c__Desulfobacteria;o__Desulfobacterales;f__Desulfobacteraceae;__;__	0	0	0	0	0	0	0	0	0	0	0	0	0	0	0	0	0	0	0	0.0305064	0	0	0	0	0	0	0	0	0	0	0
OTU311	d__Bacteria;p__Desulfobacterota;c__Desulfobacteria;o__Desulfobacterales;f__Desulfobacteraceae;g__Desulfobacter;__	0	0	0	0	0	0	0	0	0	0	0	0	0	0	0	0	0	0	0	0.0610128	0	0	0	0	0	0	0	0	0	0	0
OTU312	d__Bacteria;p__Desulfobacterota;c__Desulfobacteria;o__Desulfobacterales;f__Desulfosarcinaceae;__;__	0	0	0	0	0	0	0	0	0	0	0	0	0	0	0	0	0	0	0	0	0	0	0.115252	0	0	0	0	0	0	0	0
OTU313	d__Bacteria;p__Desulfobacterota;c__Desulfobacteria;o__Desulfobacterales;f__Desulfosarcinaceae;g__Desulfosarcina;__	0	0	0	0	0	0	0	0	0	0	0	0.00223047	0	0	0	0	0	0	0	0	0	0	0	0	0	0	0	0	0	0	0
OTU314	d__Bacteria;p__Desulfobacterota;c__Desulfobacteria;o__Desulfobacterales;f__Desulfosarcinaceae;g__Sva0081_sediment_group;__	0	0	0	0	0	0	0	0	0	0	0	0	0	0	0	0	0	0	0	0	0	0	0.115252	0	0	0	0	0	0	0	0
OTU315	d__Bacteria;p__Desulfobacterota;c__Desulfobulbia;o__Desulfobulbales;f__Desulfobulbaceae;g__uncultured;__	0	0	0	0	0	0	0	0	0	0	0	0	0	0	0	0	0	0	0	0	0	0	0.614675	0	0	0	0	0	0	0	0
OTU316	d__Bacteria;p__Desulfobacterota;c__Desulfobulbia;o__Desulfobulbales;f__Desulfobulbaceae;g__uncultured;s__uncultured_bacterium	0	0	0	0	0	0	0	0	0	0	0	0	0	0	0	0	0	0	0	0	0	0	0.26892	0	0	0	0	0	0	0	0
OTU317	d__Bacteria;p__Desulfobacterota;c__Desulfobulbia;o__Desulfobulbales;f__Desulfocapsaceae;__;__	0	0	0	0	0	0	0	0	0	0	0	0	0	0	0	0	0	0	0	0.0915192	0	0	0	0	0	0	0	0	0	0	0
OTU318	d__Bacteria;p__Desulfobacterota;c__Desulfobulbia;o__Desulfobulbales;f__Desulfocapsaceae;g__Desulforhopalus;s__uncultured_delta	0	0	0	0	0	0	0	0	0	0	0	0	0	0.0150178	0	0	0	0	0	0	0	0	0	0	0	0	0	0	0	0	0
OTU319	d__Bacteria;p__Desulfobacterota;c__Desulfobulbia;o__Desulfobulbales;f__Desulfocapsaceae;g__SEEP-SRB4;__	0	0	0	0	0	0	0	0	0	0	0	0	0	0	0	0.0177456	0	0	0	0	0	0	0	0	0	0	0	0	0	0	0
OTU320	d__Bacteria;p__Desulfobacterota;c__Desulfobulbia;o__Desulfobulbales;f__Desulfocapsaceae;g__[Desulfobacterium]_catecholicum_group;__	0	0	0	0	0	0	0	0	0	0	0	0	0	0	0	0	0	0	0	0.0915192	0	0	0	0	0	0	0	0	0	0	0
OTU321	d__Bacteria;p__Desulfobacterota;c__Desulfovibrionia;o__Desulfovibrionales;f__Desulfovibrionaceae;g__Desulfovibrio;__	0	0	0	0	0	0	0	0	0	0	0	0	0	0	0	0	0	0	0	0.050844	0	0	0	0	0	0	0	0	0	0	0
OTU322	d__Bacteria;p__Desulfobacterota;c__Desulfovibrionia;o__Desulfovibrionales;f__Desulfovibrionaceae;g__Desulfovibrio;s__Desulfovibrio_ferrireducens	0	0	0	0	0	0	0	0	0	0	0	0	0	0	0	0	0	0	0	0.122026	0	0	0	0	0	0	0	0	0	0	0
OTU323	d__Bacteria;p__Desulfobacterota;c__Desulfuromonadia;o__Bradymonadales;f__Bradymonadales;g__Bradymonadales;__	0	0	0	0	0	0	0	0	0	0	0	0	0	0.0100118	0	0	0	0	0	0	0	0	0	0	0	0	0	0	0	0	0
OTU324	d__Bacteria;p__Desulfobacterota;c__Desulfuromonadia;o__Bradymonadales;f__Bradymonadales;g__Bradymonadales;s__delta_proteobacterium	0	0	0	0	0	0	0	0	0	0	0	0	0	0.00667456	0	0.0141965	0	0	0	0	0	0	0	0	0	0	0	0	0	0	0
OTU325	d__Bacteria;p__Desulfobacterota;c__Desulfuromonadia;o__Bradymonadales;f__Bradymonadales;g__Bradymonadales;s__uncultured_bacterium	0	0	0	0	0	0	0	0	0	0	0.0179115	0.00446095	0	0.00333728	0	0	0	0	0	0	0	0	0	0	0	0	0	0	0	0	0
OTU326	d__Bacteria;p__Desulfobacterota;c__Desulfuromonadia;o__Bradymonadales;f__Bradymonadales;g__Bradymonadales;s__uncultured_delta	0	0	0	0	0	0	0	0	0	0	0	0	0	0.0166864	0	0.0141965	0	0	0	0	0	0	0	0	0	0	0	0	0.0379203	0	0
OTU327	d__Bacteria;p__Desulfobacterota;c__Desulfuromonadia;o__Bradymonadales;f__Bradymonadales;g__Bradymonadales;s__uncultured_organism	0	0	0	0	0	0	0.0111514	0	0	0	0	0	0	0	0	0	0	0	0	0	0	0	0	0	0	0	0	0	0	0	0
OTU328	d__Bacteria;p__Desulfobacterota;c__Desulfuromonadia;o__PB19;f__PB19;g__PB19;__	0	0	0	0	0	0	0	0	0	0	0	0	0	0	0	0	0	0	0.00757461	0	0	0	0	0	0	0	0	0	0	0	0
OTU329	d__Bacteria;p__Desulfobacterota;c__Desulfuromonadia;o__PB19;f__PB19;g__PB19;s__uncultured_bacterium	0	0	0	0	0	0	0	0	0	0	0	0	0	0.0183551	0	0	0	0	0	0	0	0	0	0	0	0	0	0	0	0	0
OTU330	d__Bacteria;p__Desulfobacterota;c__Desulfuromonadia;o__PB19;f__PB19;g__PB19;s__uncultured_deep-sea	0	0	0	0	0	0	0	0	0	0	0	0	0	0	0	0.0141965	0	0	0	0	0	0	0	0	0	0	0	0	0	0	0
OTU331	d__Bacteria;p__Fibrobacterota;c__Fibrobacteria;o__Fibrobacterales;f__B5-096;g__B5-096;s__uncultured_organism	0	0	0	0	0	0	0	0	0	0	0	0	0	0	0	0	0	0	0	0	0	0	0.0768344	0	0	0	0	0	0	0	0
OTU332	d__Bacteria;p__Fibrobacterota;c__Fibrobacteria;o__Fibrobacterales;f__Fibrobacteraceae;g__uncultured;__	0.00281516	0	0	0	0	0	0	0	0	0	0	0	0	0	0	0	0	0	0	0	0	0	0	0	0	0	0	0	0	0	0
OTU333	d__Bacteria;p__Fibrobacterota;c__Fibrobacteria;o__Fibrobacterales;f__Fibrobacteraceae;g__uncultured;s__uncultured_Fibrobacteres	0	0	0	0	0	0	0	0	0	0	0	0	0	0	0	0	0	0	0	0	0	0	0	0	0	0	0	0.00704424	0	0	0
OTU334	d__Bacteria;p__Fibrobacterota;c__Fibrobacteria;o__Fibrobacterales;f__Fibrobacteraceae;g__uncultured;s__uncultured_bacterium	0	0	0	0	0	0	0	0	0	0	0	0	0	0	0	0	0	0	0.0302984	0	0	0	0	0	0.0166325	0	0	0	0	0	0
OTU335	d__Bacteria;p__Fibrobacterota;c__Fibrobacteria;o__Fibrobacterales;f__Fibrobacteraceae;g__uncultured;s__uncultured_deep-sea	0	0	0	0	0	0	0.0111514	0	0	0	0	0	0	0.0100118	0	0	0	0	0	0	0	0	0	0	0	0	0	0	0	0	0
OTU336	d__Bacteria;p__Firmicutes;c__Bacilli;o__Bacillales;f__Bacillaceae;g__Halobacillus;__	0	0	0	0	0	0	0	0	0	0	0	0	0	0	0	0	0	0	0	0	0	0	0.307338	0	0	0	0	0	0	0	0
OTU337	d__Bacteria;p__Firmicutes;c__Bacilli;o__Entomoplasmatales;f__Entomoplasmatales_Incertae_Sedis;g__Candidatus_Hepatoplasma;__	0	0	0	0	0	0	0	0	0	0	0	1.11078	0.160229	0	0	0	0	0	0	0	0	0	0	0	0	0	0	0	0.193815	0	0
OTU338	d__Bacteria;p__Firmicutes;c__Bacilli;o__Erysipelotrichales;f__Erysipelotrichaceae;g__Dubosiella;s__Dubosiella_newyorkensis	0	0	0	0	0	0	0	0	0	0.0204457	0	0	0	0	0	0	0	0	0	0	0	0	0	0	0	0	0	0	0	0	0
OTU339	d__Bacteria;p__Firmicutes;c__Bacilli;o__Lactobacillales;f__Lactobacillaceae;g__Lactobacillus;__	0	0	0	0	0	0	0	0	0	0	0	0	0	0	0	0	0	0	0	0	0	0	0	0	0	0	0	0	0.0632005	0	0
OTU340	d__Bacteria;p__Firmicutes;c__Bacilli;o__Lactobacillales;f__Streptococcaceae;g__Streptococcus;__	0	0	0	0	0	0	0	0	0	0	0	0	0	0	0.00580799	0	0	0	0	0	0	0	0	0	0	0	0	0	0	0.275028	0.0600817
OTU341	d__Bacteria;p__Firmicutes;c__Bacilli;o__Mycoplasmatales;f__Mycoplasmataceae;g__Candidatus_Bacilloplasma;__	0	0	0	0	0	0	0	0	0	0	0	0	0	0	0	0	0	0	0.00757461	0	0	0	0	0	0	0	0	0	0.0210668	0	0
OTU342	d__Bacteria;p__Firmicutes;c__Bacilli;o__Mycoplasmatales;f__Mycoplasmataceae;g__Candidatus_Bacilloplasma;s__uncultured_Firmicutes	0	0	0	0	0	0.00768817	0	0	0	0	0	0.00223047	0	0	0	0	0	0	0	0	0	0	0	0	0	0	0	0	0	0	0
OTU343	d__Bacteria;p__Firmicutes;c__Bacilli;o__RF39;f__RF39;g__RF39;__	0	0	0	0	0	0	0	0	0	0	0	0	0	0	0	0	0	0	0	0.050844	0	0	0	0	0	0	0	0	0	0	0
OTU344	d__Bacteria;p__Firmicutes;c__Clostridia;__;__;__;__	0	0	0	0	0	0	0	0	0	0	0	0	0	0	0	0	0	0	0	0.0711816	0	0	0	0	0	0	0	0	0	0	0
OTU345	d__Bacteria;p__Firmicutes;c__Clostridia;o__Clostridia;f__Hungateiclostridiaceae;__;__	0	0	0	0	0	0	0	0	0	0	0	0	0	0	0	0	0	0	0	0.0915192	0	0	0.0768344	0	0	0	0	0	0	0	0
OTU346	d__Bacteria;p__Firmicutes;c__Clostridia;o__Clostridia_UCG-014;f__Clostridia_UCG-014;g__Clostridia_UCG-014;__	0.00281516	0	0	0	0	0	0	0	0	0	0	0	0	0	0	0	0	0	0	0	0	0	0	0	0	0	0	0	0	0	0
OTU347	d__Bacteria;p__Firmicutes;c__Clostridia;o__Clostridia_UCG-014;f__Clostridia_UCG-014;g__Clostridia_UCG-014;s__Clostridiales_bacterium	0	0	0	0	0	0	0	0	0	0	0	0.00223047	0	0	0	0	0	0	0	0	0	0	0	0	0	0	0	0	0	0	0
OTU348	d__Bacteria;p__Firmicutes;c__Clostridia;o__Lachnospirales;f__Lachnospiraceae;g__Lachnospiraceae_NK4A136_group;__	0	0	0	0	0	0	0	0	0	0	0	0	0	0	0	0	0	0	0	0	0	0	0.192086	0	0	0	0	0	0	0	0
OTU349	d__Bacteria;p__Firmicutes;c__Clostridia;o__Oscillospirales;f__Oscillospiraceae;g__UCG-005;__	0	0.00809236	0	0	0	0	0	0	0	0	0	0	0	0	0	0	0	0	0	0	0	0	0	0	0	0	0	0	0	0	0
OTU350	d__Bacteria;p__Firmicutes;c__Clostridia;o__Oscillospirales;f__Ruminococcaceae;g__Faecalibacterium;__	0.00281516	0	0	0	0	0	0	0	0	0	0	0	0	0	0	0	0	0	0	0	0	0	0	0	0	0	0	0	0	0	0
OTU351	d__Bacteria;p__Firmicutes;c__Clostridia;o__Peptostreptococcales-Tissierellales;f__Anaerovoracaceae;g__Anaerovorax;__	0	0	0	0	0	0	0	0	0	0	0	0	0	0	0.00387199	0	0	0	0	0	0	0	0	0	0	0	0	0	0	0	0
OTU352	d__Bacteria;p__Firmicutes;c__Clostridia;o__Peptostreptococcales-Tissierellales;f__Fusibacteraceae;g__Fusibacter;__	0	0	0	0	0	0	0	0	0	0	0	0	0	0	0	0	0	0	0	0.0203376	0	0	0	0	0	0	0	0	0	0	0
OTU353	d__Bacteria;p__Firmicutes;c__Clostridia;o__Peptostreptococcales-Tissierellales;f__Fusibacteraceae;g__Fusibacter;s__unidentified_proteobacterium	0	0	0	0	0	0	0	0	0	0	0	0.00446095	0	0	0	0	0	0	0	0	0	0	0	0	0	0	0	0	0	0	0
OTU354	d__Bacteria;p__Firmicutes;c__Negativicutes;o__Veillonellales-Selenomonadales;f__Veillonellaceae;g__Veillonella;__	0	0	0	0	0	0	0	0	0	0	0.0111947	0	0	0	0	0	0	0	0	0	0	0	0	0	0	0	0	0	0	0	0
OTU355	d__Bacteria;p__Fusobacteriota;c__Fusobacteriia;o__Fusobacteriales;f__Fusobacteriaceae;g__Fusobacterium;s__Fusobacteriaceae_bacterium	0	0	0	0	0	0	0	0	0	0	0	0	0	0	0	0	0	0	0	0.0305064	0	0	0	0	0	0	0	0	0	0	0
OTU356	d__Bacteria;p__Fusobacteriota;c__Fusobacteriia;o__Fusobacteriales;f__Fusobacteriaceae;g__Propionigenium;s__uncultured_bacterium	0	0	0	0	0	0	0	0	0	0	0	0	0	0	0	0	0	0	0.0189365	0	0	0	0	0	0	0	0	0	0	0	0
OTU357	d__Bacteria;p__Fusobacteriota;c__Fusobacteriia;o__Fusobacteriales;f__Fusobacteriaceae;g__Psychrilyobacter;__	0	0	0	0	0	0	0	0	0	0	0	0	0	0	0	0	0	0	0	0	0	0	0	0	0	0	0	0	0.227522	0	0
OTU358	d__Bacteria;p__Fusobacteriota;c__Fusobacteriia;o__Fusobacteriales;f__Fusobacteriaceae;g__Psychrilyobacter;s__uncultured_bacterium	0	0	0	0	0	0	0	0	0	0	0	0	0	0	0	0	0	0	0.0189365	0	0	0	0	0	0	0	0	0	0	0	0
OTU359	d__Bacteria;p__Fusobacteriota;c__Fusobacteriia;o__Fusobacteriales;f__Leptotrichiaceae;g__uncultured;s__uncultured_bacterium	0	0	0	0	0	0	0	0	0	0	0	0	0	0	0	0	0	0	0	0	0	0	0	0	0	0	0	0	0.0210668	0	0
OTU360	d__Bacteria;p__Gemmatimonadota;c__BD2-11_terrestrial_group;o__BD2-11_terrestrial_group;f__BD2-11_terrestrial_group;g__BD2-11_terrestrial_group;__	0	0	0	0	0	0	0	0	0	0	0	0	0	0	0	0.0674333	0	0	0.0189365	0	0	0	0.0768344	0	0	0	0	0	0	0	0
OTU361	d__Bacteria;p__Gemmatimonadota;c__BD2-11_terrestrial_group;o__BD2-11_terrestrial_group;f__BD2-11_terrestrial_group;g__BD2-11_terrestrial_group;s__uncultured_bacterium	0.00281516	0	0	0	0	0	0.0111514	0	0	0	0	0	0	0	0	0	0	0	0.0113619	0	0	0	0	0	0	0	0	0	0	0	0
OTU362	d__Bacteria;p__Gemmatimonadota;c__Longimicrobia;o__Longimicrobiales;f__Longimicrobiaceae;g__Longimicrobium;s__uncultured_bacterium	0	0	0	0	0	0	0	0	0	0	0	0	0	0	0	0	0	0	0	0	0	0	0	0	0	0	0	0	0	0	0.0120163
OTU363	d__Bacteria;p__Hydrogenedentes;c__Hydrogenedentia;o__Hydrogenedentiales;f__Hydrogenedensaceae;g__Hydrogenedensaceae;s__uncultured_bacterium	0	0	0	0	0	0	0	0	0	0	0	0	0	0.0216923	0.00580799	0	0	0	0	0	0	0	0	0	0	0	0	0	0	0	0
OTU364	d__Bacteria;p__Hydrogenedentes;c__Hydrogenedentia;o__Hydrogenedentiales;f__Hydrogenedensaceae;g__Hydrogenedensaceae;s__uncultured_proteobacterium	0	0	0	0	0	0	0	0	0	0	0	0	0	0	0	0	0	0	0	0.0305064	0	0	0	0	0	0	0	0	0	0	0
OTU365	d__Bacteria;p__Hydrogenedentes;c__Hydrogenedentia;o__Hydrogenedentiales;f__Hydrogenedensaceae;g__Hydrogenedensaceae;s__uncultured_sediment	0	0	0	0	0	0	0	0	0	0	0	0	0	0.00834321	0	0	0	0	0	0	0	0	0	0	0	0	0	0	0	0	0
OTU366	d__Bacteria;p__LCP-89;c__LCP-89;o__LCP-89;f__LCP-89;g__LCP-89;s__uncultured_bacterium	0	0	0	0	0	0	0	0	0	0	0	0	0	0	0	0	0.00778998	0	0	0	0	0	0	0	0	0	0	0	0	0	0
OTU367	d__Bacteria;p__Latescibacterota;c__Latescibacterota;o__Latescibacterota;f__Latescibacterota;g__Latescibacterota;__	0.00422274	0	0	0	0	0	0	0	0	0	0	0	0	0	0	0.0106474	0	0	0.00757461	0	0	0	0	0	0	0	0	0	0	0	0
OTU368	d__Bacteria;p__Latescibacterota;c__Latescibacterota;o__Latescibacterota;f__Latescibacterota;g__Latescibacterota;s__saltmarsh_clone	0	0	0	0	0	0	0	0	0	0	0	0	0	0.0150178	0.011616	0.0177456	0	0	0	0.0305064	0	0	0	0	0	0	0	0	0	0	0
OTU369	d__Bacteria;p__Latescibacterota;c__Latescibacterota;o__Latescibacterota;f__Latescibacterota;g__Latescibacterota;s__uncultured_Bacteroidetes	0	0	0	0	0	0	0	0	0	0	0	0	0	0	0	0	0	0	0	0	0	0	0.307338	0	0	0	0	0	0	0	0
OTU370	d__Bacteria;p__Latescibacterota;c__Latescibacterota;o__Latescibacterota;f__Latescibacterota;g__Latescibacterota;s__uncultured_bacterium	0	0	0	0	0	0	0	0	0	0	0	0	0	0	0	0	0	0	0	0	0	0	0.0768344	0	0	0	0	0	0	0	0
OTU371	d__Bacteria;p__Marinimicrobia_(SAR406_clade);c__Marinimicrobia_(SAR406_clade);o__Marinimicrobia_(SAR406_clade);f__Marinimicrobia_(SAR406_clade);g__Marinimicrobia_(SAR406_clade);s__uncultured_delta	0	0	0	0	0	0	0	0	0	0	0	0	0	0	0	0	0	0	0	0.0203376	0	0	0	0	0	0	0	0.0105664	0	0	0
OTU372	d__Bacteria;p__Modulibacteria;c__Moduliflexia;o__Moduliflexales;f__Moduliflexaceae;g__Moduliflexaceae;__	0	0	0	0	0	0	0	0	0	0	0	0	0	0	0	0	0	0	0	0.0406752	0	0	0	0	0	0	0	0	0	0	0
OTU373	d__Bacteria;p__Myxococcota;__;__;__;__;__	0	0	0	0	0	0	0	0	0	0	0	0	0	0	0	0	0	0	0.00757461	0	0	0	0	0	0	0	0	0	0	0	0
OTU374	d__Bacteria;p__Myxococcota;c__Myxococcia;o__Myxococcales;f__Myxococcaceae;g__P3OB-42;__	0	0	0	0	0	0	0	0	0	0.0102229	0	0	0	0	0	0	0	0	0	0	0	0	0	0	0	0	0	0	0	0	0
OTU375	d__Bacteria;p__Myxococcota;c__Polyangia;o__Blfdi19;f__Blfdi19;g__Blfdi19;s__uncultured_bacterium	0.00563031	0	0	0	0	0	0	0	0	0	0	0	0	0.0100118	0	0	0	0	0	0	0	0	0	0	0	0	0	0	0	0	0
OTU376	d__Bacteria;p__Myxococcota;c__Polyangia;o__Haliangiales;f__Haliangiaceae;g__Haliangium;__	0.00422274	0	0	0	0	0	0	0	0	0	0	0	0	0.0100118	0.015488	0.0638842	0	0	0	0	0	0	0	0	0	0	0	0	0	0	0
OTU377	d__Bacteria;p__Myxococcota;c__Polyangia;o__Haliangiales;f__Haliangiaceae;g__Haliangium;s__uncultured_deep-sea	0	0	0	0	0	0	0	0	0	0	0	0	0	0.0133491	0	0.0248438	0	0	0	0	0	0	0	0	0	0	0	0	0	0	0
OTU378	d__Bacteria;p__Myxococcota;c__Polyangia;o__Nannocystales;f__Nannocystaceae;__;__	0.00703789	0	0	0	0	0	0	0	0	0.0102229	0.00895576	0.00223047	0	0	0.00580799	0.0177456	0	0	0	0	0	0	0	0	0	0	0	0	0	0	0
OTU379	d__Bacteria;p__Myxococcota;c__Polyangia;o__Nannocystales;f__Nannocystaceae;g__Nannocystaceae;__	0	0	0	0	0	0	0	0	0	0	0	0	0.00485543	0	0	0	0	0	0	0	0	0	0	0	0	0	0	0	0	0	0
OTU380	d__Bacteria;p__Myxococcota;c__Polyangia;o__Nannocystales;f__Nannocystaceae;g__Nannocystaceae;s__Enhygromyxa_sp.	0	0	0	0	0	0	0	0	0	0	0	0	0	0.0150178	0	0	0	0	0	0	0	0	0	0	0	0	0	0	0	0	0
OTU381	d__Bacteria;p__Myxococcota;c__Polyangia;o__Nannocystales;f__Nannocystaceae;g__Nannocystis;s__uncultured_delta	0.00422274	0	0	0	0	0	0	0	0	0	0	0	0	0	0	0	0	0	0	0	0	0	0	0	0	0	0	0	0	0	0
OTU382	d__Bacteria;p__Myxococcota;c__Polyangia;o__Nannocystales;f__Nannocystaceae;g__uncultured;__	0	0	0	0	0	0	0	0	0	0	0	0	0	0	0	0	0	0	0.00757461	0	0	0	0	0	0	0	0	0	0	0	0.00801089
OTU383	d__Bacteria;p__Myxococcota;c__Polyangia;o__Nannocystales;f__Nannocystaceae;g__uncultured;s__uncultured_proteobacterium	0	0	0	0	0	0	0	0	0	0	0	0	0	0	0	0.0354912	0	0	0	0	0	0	0	0	0	0	0	0	0	0	0
OTU384	d__Bacteria;p__Myxococcota;c__Polyangia;o__Polyangiales;f__BIrii41;g__BIrii41;__	0	0	0	0	0	0	0	0	0	0	0	0	0	0.0200237	0	0	0	0	0.00757461	0	0	0	0	0	0	0	0	0	0.0337069	0	0
OTU385	d__Bacteria;p__Myxococcota;c__Polyangia;o__Polyangiales;f__Eel-36e1D6;g__Eel-36e1D6;s__uncultured_delta	0	0	0	0	0	0	0	0	0	0.0153343	0	0	0	0	0	0.0638842	0	0	0	0	0	0	0	0	0	0	0	0	0	0	0
OTU386	d__Bacteria;p__Myxococcota;c__Polyangia;o__Polyangiales;f__Sandaracinaceae;__;__	0	0	0	0	0	0	0	0	0	0	0	0	0	0.00667456	0	0	0	0	0	0	0	0	0	0	0	0	0	0	0	0	0
OTU387	d__Bacteria;p__Myxococcota;c__Polyangia;o__Polyangiales;f__Sandaracinaceae;g__uncultured;__	0	0	0	0	0	0	0	0	0	0	0	0	0	0	0	0	0	0	0	0	0	0	0.0768344	0	0	0	0	0	0	0	0
OTU388	d__Bacteria;p__Myxococcota;c__Polyangia;o__Polyangiales;f__Sandaracinaceae;g__uncultured;s__uncultured_delta	0	0	0	0	0	0	0.0111514	0	0	0	0	0	0	0	0	0.0141965	0	0	0.00757461	0	0	0	0	0	0	0	0	0	0	0	0
OTU389	d__Bacteria;p__Myxococcota;c__bacteriap25;o__bacteriap25;f__bacteriap25;g__bacteriap25;__	0	0	0	0	0	0	0	0	0	0	0	0	0	0	0	0	0	0	0	0	0	0	0.115252	0	0	0	0	0	0	0	0
OTU390	d__Bacteria;p__Myxococcota;c__bacteriap25;o__bacteriap25;f__bacteriap25;g__bacteriap25;s__uncultured_organism	0	0	0	0	0	0	0	0	0	0	0	0	0	0.00667456	0	0	0	0	0	0	0	0	0	0	0	0	0	0	0	0	0
OTU391	d__Bacteria;p__NB1-j;c__NB1-j;o__NB1-j;f__NB1-j;g__NB1-j;__	0.00563031	0.00539491	0	0	0	0	0	0	0	0	0.00895576	0.00223047	0	0.00500592	0.0309759	0.0248438	0	0	0.0340857	0.0203376	0	0	0	0	0	0	0	0	0	0	0
OTU392	d__Bacteria;p__NB1-j;c__NB1-j;o__NB1-j;f__NB1-j;g__NB1-j;s__uncultured_bacterium	0	0	0	0	0	0.00768817	0	0	0	0	0	0	0	0	0	0	0	0	0	0	0	0	0	0	0	0	0	0	0	0	0
OTU393	d__Bacteria;p__NB1-j;c__NB1-j;o__NB1-j;f__NB1-j;g__NB1-j;s__uncultured_deep-sea	0	0	0	0	0	0	0	0	0	0	0	0	0	0	0	0	0.011685	0	0	0	0	0	0	0	0.0166325	0	0	0	0	0	0
OTU394	d__Bacteria;p__Nitrospinota;c__Nitrospinia;o__Nitrospinales;f__Nitrospinaceae;g__LS-NOB;__	0.00563031	0	0	0	0.0214675	0	0	0	0	0.0255571	0.00895576	0.00780666	0.00971086	0.023361	0.0348479	0.028393	0	0	0.0227238	0	0	0	0	0	0	0.0340213	0	0	0	0	0
OTU395	d__Bacteria;p__Nitrospinota;c__Nitrospinia;o__Nitrospinales;f__Nitrospinaceae;g__LS-NOB;s__uncultured_delta	0.0394122	0	0	0	0	0	0	0	0	0	0	0.0200743	0.016994	0	0	0.0248438	0.0350549	0	0	0	0	0	0	0	0	0	0	0	0	0	0.0160218
OTU396	d__Bacteria;p__Nitrospinota;c__Nitrospinia;o__Nitrospinales;f__Nitrospinaceae;g__Nitrospina;__	0	0	0	0	0	0.0153763	0	0.0026059	0	0	0.0134336	0	0	0.0200237	0.00774398	0	0	0	0.087108	0.0305064	0	0	0	0	0	0.0226809	0	0.059876	0	0	0
OTU397	d__Bacteria;p__Nitrospinota;c__Nitrospinia;o__Nitrospinales;f__Nitrospinaceae;g__Nitrospina;s__uncultured_bacterium	0	0	0	0	0	0	0	0	0	0	0	0.0200743	0	0	0.0251679	0.0780806	0	0	0.113619	0	0	0	0	0	0	0	0	0	0	0	0.100136
OTU398	d__Bacteria;p__Nitrospinota;c__Nitrospinia;o__Nitrospinales;f__Nitrospinaceae;g__uncultured;s__uncultured_bacterium	0.00422274	0	0	0	0	0	0	0	0	0	0	0	0	0.0183551	0.00774398	0	0.0701098	0	0.0416604	0	0	0	0	0	0	0	0	0	0	0	0.0400545
OTU399	d__Bacteria;p__Nitrospirota;c__BMS9AB35;o__BMS9AB35;f__BMS9AB35;g__BMS9AB35;s__uncultured_bacterium	0	0	0	0	0	0	0	0	0	0	0	0	0	0	0	0	0	0	0	0.0203376	0	0	0	0	0	0	0	0	0	0	0
OTU400	d__Bacteria;p__Nitrospirota;c__Nitrospiria;o__Nitrospirales;f__Nitrospiraceae;g__Nitrospira;__	0.0337819	0.0134873	0.00535198	0.0311023	0.017174	0.0153763	0	0	0	0.0153343	0.00671682	0.0301114	0.0315603	0.0517279	0.0755038	0.0106474	0.0389499	0	0.53401	0	0	0	0.0768344	0	0	0	0	0	0	0	0.172234
OTU401	d__Bacteria;p__Patescibacteria;c__Gracilibacteria;__;__;__;__	0	0	0	0	0	0	0	0	0	0	0	0	0	0	0.00580799	0	0	0	0	0	0	0	0	0	0	0	0	0	0	0	0
OTU402	d__Bacteria;p__Patescibacteria;c__Saccharimonadia;o__Saccharimonadales;f__Saccharimonadales;g__Saccharimonadales;s__uncultured_bacterium	0	0	0	0	0	0	0	0	0	0	0	0	0	0	0	0.00709824	0	0	0	0	0	0	0	0	0	0	0	0	0	0	0
OTU403	d__Bacteria;p__Planctomycetota;__;__;__;__;__	0	0	0	0	0	0	0	0	0	0	0.00447788	0.0200743	0.00971086	0.0100118	0.0503359	0.0816298	0.011685	0	0	0	0	0	0	0	0	0	0	0	0	0	0.0680926
OTU404	d__Bacteria;p__Planctomycetota;c__BD7-11;o__BD7-11;f__BD7-11;g__BD7-11;__	0	0	0	0	0	0	0	0	0	0	0	0	0	0	0	0	0	0	0	0.0305064	0	0	0	0	0	0	0	0	0	0	0
OTU405	d__Bacteria;p__Planctomycetota;c__BD7-11;o__BD7-11;f__BD7-11;g__BD7-11;s__uncultured_bacterium	0.00281516	0	0	0	0	0	0	0	0	0	0.00447788	0	0.0121386	0	0	0.0177456	0	0	0	0	0	0	0	0	0	0	0	0	0	0	0
OTU406	d__Bacteria;p__Planctomycetota;c__BD7-11;o__BD7-11;f__BD7-11;g__BD7-11;s__uncultured_marine	0	0	0	0	0	0	0	0	0	0	0	0.00557619	0	0	0	0	0	0	0	0	0	0	0	0	0	0	0	0	0	0	0
OTU407	d__Bacteria;p__Planctomycetota;c__BD7-11;o__BD7-11;f__BD7-11;g__BD7-11;s__uncultured_planctomycete	0	0	0	0	0	0	0	0	0	0	0	0	0	0.0133491	0	0	0	0	0	0	0	0	0	0	0	0	0	0	0	0	0
OTU408	d__Bacteria;p__Planctomycetota;c__OM190;o__OM190;f__OM190;g__OM190;__	0.0225213	0	0	0	0	0	0.0111514	0	0	0	0.00447788	0.0167286	0.0145663	0.0517279	0.0542079	0.177456	0.00778998	0	0.0757461	0	0	0	0	0	0	0	0	0	0.0168535	0	0.0640872
OTU409	d__Bacteria;p__Planctomycetota;c__OM190;o__OM190;f__OM190;g__OM190;s__marine_metagenome	0	0	0	0	0	0	0	0	0	0	0	0	0	0	0.021296	0	0	0	0	0	0	0	0	0	0	0	0	0	0	0	0
OTU410	d__Bacteria;p__Planctomycetota;c__OM190;o__OM190;f__OM190;g__OM190;s__uncultured_Planctomyces	0	0	0	0	0	0	0	0	0	0	0	0	0	0	0	0	0	0	0	0	0	0	0	0	0	0	0	0	0	0	0.0120163
OTU411	d__Bacteria;p__Planctomycetota;c__OM190;o__OM190;f__OM190;g__OM190;s__uncultured_bacterium	0.00563031	0	0	0	0	0	0	0	0	0	0.00447788	0	0	0.00667456	0.015488	0.0248438	0	0	0.0340857	0	0	0	0	0	0	0	0	0	0	0	0
OTU412	d__Bacteria;p__Planctomycetota;c__OM190;o__OM190;f__OM190;g__OM190;s__uncultured_deep-sea	0	0	0	0	0	0	0	0	0	0	0	0	0	0	0.00580799	0	0	0	0	0	0	0	0	0	0	0	0	0	0	0	0
OTU413	d__Bacteria;p__Planctomycetota;c__OM190;o__OM190;f__OM190;g__OM190;s__uncultured_marine	0	0	0	0	0	0	0	0	0	0	0	0	0	0.0150178	0.021296	0.0709824	0	0	0	0	0	0	0	0	0	0	0	0	0	0	0
OTU414	d__Bacteria;p__Planctomycetota;c__OM190;o__OM190;f__OM190;g__OM190;s__uncultured_planctomycete	0	0	0	0	0	0	0	0	0	0	0	0.00446095	0	0.00834321	0.021296	0	0	0	0	0	0	0	0	0	0	0	0	0	0	0	0
OTU415	d__Bacteria;p__Planctomycetota;c__Phycisphaerae;o__CCM11a;f__CCM11a;g__CCM11a;__	0	0	0	0	0	0	0	0	0	0	0	0	0	0	0	0.0106474	0	0	0	0	0	0	0	0	0	0	0	0	0	0	0
OTU416	d__Bacteria;p__Planctomycetota;c__Phycisphaerae;o__MSBL9;f__4572-13;g__4572-13;__	0	0	0	0	0	0	0	0	0	0	0	0	0	0	0	0	0	0	0	0.0203376	0	0	0	0	0	0	0	0	0	0	0
OTU417	d__Bacteria;p__Planctomycetota;c__Phycisphaerae;o__Phycisphaerales;f__Phycisphaeraceae;__;__	0	0	0	0	0	0	0	0	0	0	0	0	0	0	0	0	0	0	0	0	0	0	0	0	0	0	0	0	0	0	0.036049
OTU418	d__Bacteria;p__Planctomycetota;c__Phycisphaerae;o__Phycisphaerales;f__Phycisphaeraceae;g__Algisphaera;__	0	0	0	0	0	0	0	0	0	0	0	0	0	0	0	0.0461386	0	0	0	0	0	0	0	0	0	0	0	0	0	0	0
OTU419	d__Bacteria;p__Planctomycetota;c__Phycisphaerae;o__Phycisphaerales;f__Phycisphaeraceae;g__CL500-3;s__uncultured_Phycisphaeraceae	0	0	0	0	0	0	0	0	0.00322945	0	0	0	0	0	0	0	0	0	0	0	0	0	0	0	0	0	0	0	0	0	0
OTU420	d__Bacteria;p__Planctomycetota;c__Phycisphaerae;o__Phycisphaerales;f__Phycisphaeraceae;g__CL500-3;s__uncultured_marine	0	0	0	0	0	0.00768817	0.0111514	0	0	0	0	0	0	0	0	0	0	0	0	0	0	0	0	0	0	0	0	0	0	0	0
OTU421	d__Bacteria;p__Planctomycetota;c__Phycisphaerae;o__Phycisphaerales;f__Phycisphaeraceae;g__FS140-16B-02_marine_group;s__uncultured_organism	0	0	0	0	0	0	0	0	0	0	0.00447788	0	0	0	0	0	0	0	0	0	0	0	0	0	0	0	0	0.0140885	0	0	0
OTU422	d__Bacteria;p__Planctomycetota;c__Phycisphaerae;o__Phycisphaerales;f__Phycisphaeraceae;g__FS140-16B-02_marine_group;s__uncultured_planctomycete	0	0	0	0	0	0	0	0	0	0	0	0.00334571	0	0	0	0	0	0	0	0	0	0	0	0	0	0	0	0	0	0	0
OTU423	d__Bacteria;p__Planctomycetota;c__Phycisphaerae;o__Phycisphaerales;f__Phycisphaeraceae;g__JL-ETNP-F27;s__uncultured_organism	0	0	0	0	0	0	0	0	0	0	0	0	0	0.00834321	0	0.0425894	0	0	0	0	0	0	0	0	0	0	0	0	0	0	0
OTU424	d__Bacteria;p__Planctomycetota;c__Phycisphaerae;o__Phycisphaerales;f__Phycisphaeraceae;g__Phycisphaera;__	0.00985305	0	0	0	0	0	0	0	0	0	0	0.0245352	0	0.0400474	0.00774398	0.0709824	0	0	0.037873	0	0	0	0	0	0	0.0453618	0	0	0	0	0.0240327
OTU425	d__Bacteria;p__Planctomycetota;c__Phycisphaerae;o__Phycisphaerales;f__Phycisphaeraceae;g__Phycisphaera;s__uncultured_Planctomycetales	0	0	0	0	0	0	0	0	0	0	0	0	0	0	0.011616	0	0	0	0.0151492	0	0	0	0	0	0	0	0	0	0	0	0.240327
OTU426	d__Bacteria;p__Planctomycetota;c__Phycisphaerae;o__Phycisphaerales;f__Phycisphaeraceae;g__SM1A02;__	0	0	0	0	0	0	0	0	0	0	0.0246283	0	0.00485543	0	0.011616	0.106474	0	0	0	0	0	0	0	0	0	0	0	0	0	0	0
OTU427	d__Bacteria;p__Planctomycetota;c__Phycisphaerae;o__Phycisphaerales;f__Phycisphaeraceae;g__SM1A02;s__Planctomycetaceae_bacterium	0	0	0	0	0	0	0	0	0	0	0	0	0	0	0	0	0	0	0.037873	0	0	0	0	0	0	0	0	0	0	0	0
OTU428	d__Bacteria;p__Planctomycetota;c__Phycisphaerae;o__Phycisphaerales;f__Phycisphaeraceae;g__SM1A02;s__marine_metagenome	0	0	0	0	0	0	0	0	0	0	0	0	0	0	0.00967998	0	0	0	0	0	0	0	0	0	0	0	0	0	0	0	0
OTU429	d__Bacteria;p__Planctomycetota;c__Phycisphaerae;o__Phycisphaerales;f__Phycisphaeraceae;g__SM1A02;s__uncultured_Algisphaera	0	0	0	0	0	0	0	0	0	0	0	0	0	0.0100118	0	0.166809	0	0	0.0151492	0	0	0	0	0	0	0	0	0	0	0	0.0440599
OTU430	d__Bacteria;p__Planctomycetota;c__Phycisphaerae;o__Phycisphaerales;f__Phycisphaeraceae;g__SM1A02;s__uncultured_bacterium	0	0	0	0	0	0	0	0	0	0	0	0	0	0	0.00580799	0.0709824	0.00778998	0	0	0	0	0	0	0	0	0	0	0	0	0	0
OTU431	d__Bacteria;p__Planctomycetota;c__Phycisphaerae;o__Phycisphaerales;f__Phycisphaeraceae;g__SM1A02;s__uncultured_organism	0	0	0	0	0	0	0	0	0	0	0	0	0	0	0	0	0	0	0	0	0	0	0	0	0	0	0	0	0	0	0.0160218
OTU432	d__Bacteria;p__Planctomycetota;c__Phycisphaerae;o__Phycisphaerales;f__Phycisphaeraceae;g__Urania-1B-19_marine_sediment_group;__	0	0	0	0	0	0	0	0	0	0	0	0	0	0	0	0.060335	0	0	0.0189365	0	0	0	0	0	0	0	0	0	0	0	0.00801089
OTU433	d__Bacteria;p__Planctomycetota;c__Phycisphaerae;o__Phycisphaerales;f__Phycisphaeraceae;g__Urania-1B-19_marine_sediment_group;s__uncultured_bacterium	0	0	0	0	0	0	0	0	0	0	0	0	0	0.00667456	0	0	0	0	0	0	0	0	0	0	0	0	0	0	0	0	0
OTU434	d__Bacteria;p__Planctomycetota;c__Phycisphaerae;o__Phycisphaerales;f__Phycisphaeraceae;g__uncultured;__	0.00422274	0	0	0	0	0	0	0	0	0	0	0.00223047	0	0	0.00580799	0	0	0	0.0151492	0	0	0	0	0	0	0	0	0	0	0	0
OTU435	d__Bacteria;p__Planctomycetota;c__Phycisphaerae;o__Phycisphaerales;f__Phycisphaeraceae;g__uncultured;s__uncultured_bacterium	0.00281516	0.00809236	0	0	0	0	0	0	0	0	0.00447788	0.00223047	0	0.00667456	0.0251679	0.0461386	0.01558	0	0.0681715	0	0	0	0.0768344	0	0.0110883	0	0	0	0	0	0
OTU436	d__Bacteria;p__Planctomycetota;c__Pla3_lineage;o__Pla3_lineage;f__Pla3_lineage;g__Pla3_lineage;__	0	0	0	0	0	0	0	0	0	0	0	0	0	0.00834321	0.011616	0	0	0	0	0	0	0	0	0	0	0	0	0	0	0	0
OTU437	d__Bacteria;p__Planctomycetota;c__Pla3_lineage;o__Pla3_lineage;f__Pla3_lineage;g__Pla3_lineage;s__uncultured_bacterium	0.00563031	0	0	0	0	0	0	0	0	0	0	0.00223047	0	0	0.00967998	0	0	0	0	0	0	0	0	0	0	0	0	0	0	0	0
OTU438	d__Bacteria;p__Planctomycetota;c__Pla3_lineage;o__Pla3_lineage;f__Pla3_lineage;g__Pla3_lineage;s__uncultured_planctomycete	0	0	0	0	0	0	0	0	0	0	0	0	0	0	0	0	0	0	0	0	0	0	0	0	0	0	0	0	0	0	0.0240327
OTU439	d__Bacteria;p__Planctomycetota;c__Pla3_lineage;o__Pla3_lineage;f__Pla3_lineage;g__Pla3_lineage;s__unidentified_marine	0	0	0	0	0	0	0	0	0	0	0	0	0	0	0	0.0106474	0	0	0	0	0	0	0	0	0	0	0	0	0	0	0
OTU440	d__Bacteria;p__Planctomycetota;c__Pla4_lineage;o__Pla4_lineage;f__Pla4_lineage;g__Pla4_lineage;__	0	0	0	0	0	0	0	0	0	0	0	0	0	0.0166864	0.00774398	0.0141965	0	0	0.0113619	0	0	0	0	0	0	0	0	0	0	0	0
OTU441	d__Bacteria;p__Planctomycetota;c__Pla4_lineage;o__Pla4_lineage;f__Pla4_lineage;g__Pla4_lineage;s__uncultured_bacterium	0	0	0	0.00622045	0	0	0	0	0	0	0	0.00223047	0	0	0	0	0	0	0	0	0	0	0	0	0	0	0	0	0	0	0.0120163
OTU442	d__Bacteria;p__Planctomycetota;c__Pla4_lineage;o__Pla4_lineage;f__Pla4_lineage;g__Pla4_lineage;s__uncultured_planctomycete	0	0	0	0	0	0	0	0	0	0	0	0	0	0	0	0.0106474	0	0	0	0	0	0	0	0	0	0	0.0102631	0	0	0	0
OTU443	d__Bacteria;p__Planctomycetota;c__Planctomycetes;o__Gemmatales;f__Gemmataceae;g__uncultured;__	0	0	0.00356799	0	0	0	0	0	0	0	0	0	0	0	0	0	0	0	0	0	0	0	0	0	0	0	0	0	0	0	0
OTU444	d__Bacteria;p__Planctomycetota;c__Planctomycetes;o__Gemmatales;f__Gemmataceae;g__uncultured;s__uncultured_prokaryote	0	0	0	0	0	0	0	0	0	0	0	0	0	0	0	0	0	0	0	0	0	0	0.115252	0	0	0	0	0	0	0	0
OTU445	d__Bacteria;p__Planctomycetota;c__Planctomycetes;o__Pirellulales;f__Pirellulaceae;__;__	0	0	0	0	0	0	0	0	0	0	0	0	0	0.00834321	0	0.0425894	0	0	0	0.0203376	0	0	0.0768344	0	0	0	0	0	0	0	0.0240327
OTU446	d__Bacteria;p__Planctomycetota;c__Planctomycetes;o__Pirellulales;f__Pirellulaceae;g__Blastopirellula;__	0	0	0	0	0	0	0	0	0	0	0.0134336	0.0156133	0.0145663	0.0100118	0.0387199	0.177456	0	0	0	0	0	0	0	0	0	0	0	0	0	0	0
OTU447	d__Bacteria;p__Planctomycetota;c__Planctomycetes;o__Pirellulales;f__Pirellulaceae;g__Blastopirellula;s__uncultured_bacterium	0	0	0	0	0	0	0	0	0	0	0	0	0	0	0	0.0390403	0	0	0	0	0	0	0	0	0	0	0	0	0	0	0
OTU448	d__Bacteria;p__Planctomycetota;c__Planctomycetes;o__Pirellulales;f__Pirellulaceae;g__Blastopirellula;s__uncultured_marine	0	0	0	0	0	0	0	0	0	0	0	0	0	0	0	0.0709824	0	0	0	0	0	0	0	0	0	0	0	0	0	0	0
OTU449	d__Bacteria;p__Planctomycetota;c__Planctomycetes;o__Pirellulales;f__Pirellulaceae;g__Blastopirellula;s__uncultured_planctomycete	0.0225213	0	0	0	0	0	0	0	0	0.0613371	0	0	0	0	0	0.152612	0	0	0	0	0	0	0	0	0	0	0	0	0	0	0.0160218
OTU450	d__Bacteria;p__Planctomycetota;c__Planctomycetes;o__Pirellulales;f__Pirellulaceae;g__Bythopirellula;s__uncultured_bacterium	0	0	0	0	0	0	0	0	0	0	0	0	0	0.0200237	0	0.0638842	0	0	0	0	0	0	0	0	0	0	0	0	0	0	0
OTU451	d__Bacteria;p__Planctomycetota;c__Planctomycetes;o__Pirellulales;f__Pirellulaceae;g__Pir4_lineage;__	0	0	0	0	0	0	0	0	0	0	0	0.00334571	0.0121386	0.00834321	0.00387199	0.138416	0.01558	0	0	0	0	0	0	0	0	0	0	0	0	0	0.0120163
OTU452	d__Bacteria;p__Planctomycetota;c__Planctomycetes;o__Pirellulales;f__Pirellulaceae;g__Pir4_lineage;s__metagenome	0	0	0	0	0	0	0	0	0	0	0	0	0	0	0	0	0	0	0	0	0	0	0.0768344	0	0	0	0	0	0	0	0
OTU453	d__Bacteria;p__Planctomycetota;c__Planctomycetes;o__Pirellulales;f__Pirellulaceae;g__Pir4_lineage;s__uncultured_Planctomycetaceae	0	0	0	0	0	0	0	0	0	0	0	0	0	0	0	0	0	0	0	0.0610128	0	0	0	0	0	0	0	0	0	0	0
OTU454	d__Bacteria;p__Planctomycetota;c__Planctomycetes;o__Pirellulales;f__Pirellulaceae;g__Pir4_lineage;s__uncultured_Planctomycetales	0	0	0	0	0	0	0	0	0	0	0	0	0	0	0	0.0177456	0	0	0	0	0	0	0	0	0	0	0	0	0	0	0
OTU455	d__Bacteria;p__Planctomycetota;c__Planctomycetes;o__Pirellulales;f__Pirellulaceae;g__Pirellula;__	0	0	0	0	0	0	0	0	0	0	0	0	0	0	0	0.028393	0	0	0	0	0	0	0	0	0	0	0	0	0	0	0
OTU456	d__Bacteria;p__Planctomycetota;c__Planctomycetes;o__Pirellulales;f__Pirellulaceae;g__Rhodopirellula;__	0	0	0	0	0	0	0	0	0	0	0	0	0	0	0	0.0674333	0	0	0	0	0	0	0.307338	0	0	0	0	0	0	0	0
OTU457	d__Bacteria;p__Planctomycetota;c__Planctomycetes;o__Pirellulales;f__Pirellulaceae;g__Rhodopirellula;s__Pirellula_sp.	0	0	0	0	0	0	0	0	0	0	0	0	0	0	0	0.0106474	0	0	0	0	0	0	0	0	0	0	0	0	0	0	0
OTU458	d__Bacteria;p__Planctomycetota;c__Planctomycetes;o__Pirellulales;f__Pirellulaceae;g__Rhodopirellula;s__hydrothermal_vent	0	0	0	0	0	0	0	0	0	0	0	0	0	0	0.00580799	0	0	0	0	0	0	0	0	0	0	0	0	0	0	0	0
OTU459	d__Bacteria;p__Planctomycetota;c__Planctomycetes;o__Pirellulales;f__Pirellulaceae;g__Rhodopirellula;s__planctomycete_MS3065	0	0	0	0	0	0	0	0	0	0	0	0	0	0	0	0.12067	0.0311599	0	0	0	0	0	0.192086	0	0	0	0	0	0	0	0
OTU460	d__Bacteria;p__Planctomycetota;c__Planctomycetes;o__Pirellulales;f__Pirellulaceae;g__Rhodopirellula;s__uncultured_planctomycete	0	0	0	0	0	0	0	0	0	0.0102229	0	0	0	0	0	0	0	0	0	0	0	0	0	0	0	0	0	0	0	0	0
OTU461	d__Bacteria;p__Planctomycetota;c__Planctomycetes;o__Pirellulales;f__Pirellulaceae;g__Rubripirellula;__	0	0	0	0	0.0214675	0	0	0	0	0.0460029	0.0156726	0	0.0267049	0.0350415	0.011616	0.273282	0	0	0.0454477	0.0406752	0	0	0	0	0	0	0	0	0.0168535	0	0.0240327
OTU462	d__Bacteria;p__Planctomycetota;c__Planctomycetes;o__Pirellulales;f__Pirellulaceae;g__uncultured;__	0	0	0	0	0	0	0	0	0	0	0	0	0	0	0	0	0	0	0	0	0	0	0.153669	0	0	0	0	0	0	0	0.0160218
OTU463	d__Bacteria;p__Planctomycetota;c__Planctomycetes;o__Planctomycetales;__;__;__	0	0	0	0	0	0	0	0	0	0	0.00671682	0	0	0	0	0.0106474	0	0	0	0	0	0	0	0	0	0	0	0	0	0	0
OTU464	d__Bacteria;p__Planctomycetota;c__Planctomycetes;o__Planctomycetales;f__Gimesiaceae;g__Gimesia;__	0	0	0	0	0	0	0	0	0	0.0204457	0.0335841	0	0	0	0	0	0	0	0	0	0	0	0	0	0	0	0	0	0	0	0
OTU465	d__Bacteria;p__Planctomycetota;c__Planctomycetes;o__Planctomycetales;f__Gimesiaceae;g__Gimesia;s__uncultured_planctomycete	0.00844547	0	0	0	0	0	0	0	0	0	0	0	0	0	0	0.0993754	0	0	0.0151492	0	0	0	0	0	0	0	0	0	0	0	0.0160218
OTU466	d__Bacteria;p__Planctomycetota;c__Planctomycetes;o__Planctomycetales;f__Gimesiaceae;g__uncultured;__	0	0	0	0	0	0	0	0	0	0	0	0.00446095	0	0	0	0	0	0	0	0	0	0	0	0	0	0	0	0	0	0	0
OTU467	d__Bacteria;p__Planctomycetota;c__Planctomycetes;o__Planctomycetales;f__Gimesiaceae;g__uncultured;s__planctomycete_DDSW1318	0	0	0	0	0	0	0	0.0026059	0	0	0	0	0.00971086	0	0	0.0319421	0	0	0	0	0	0	0	0	0	0	0	0	0	0	0
OTU468	d__Bacteria;p__Planctomycetota;c__Planctomycetes;o__Planctomycetales;f__Gimesiaceae;g__uncultured;s__uncultured_bacterium	0	0	0	0	0	0	0	0	0	0	0.00671682	0	0	0.00500592	0	0.0177456	0	0	0	0	0	0	0	0	0	0	0	0	0	0	0
OTU469	d__Bacteria;p__Planctomycetota;c__Planctomycetes;o__Planctomycetales;f__Gimesiaceae;g__uncultured;s__uncultured_organism	0	0	0	0	0	0	0	0	0	0	0	0	0	0	0	0.028393	0	0	0	0	0	0	0	0	0	0	0	0	0	0	0
OTU470	d__Bacteria;p__Planctomycetota;c__Planctomycetes;o__Planctomycetales;f__Gimesiaceae;g__uncultured;s__uncultured_planctomycete	0	0	0	0	0	0	0	0	0	0	0	0	0	0	0	0.0177456	0	0	0	0	0	0	0.0768344	0	0	0	0	0	0	0	0.0240327
OTU471	d__Bacteria;p__Planctomycetota;c__Planctomycetes;o__Planctomycetales;f__Rubinisphaeraceae;__;__	0	0	0	0	0	0	0	0	0	0	0	0	0	0	0	0	0	0	0	0	0	0	0	0	0	0	0	0	0	0	0.0200272
OTU472	d__Bacteria;p__Planctomycetota;c__Planctomycetes;o__Planctomycetales;f__Rubinisphaeraceae;g__Fuerstia;s__uncultured_bacterium	0	0	0	0	0	0	0	0	0	0	0	0	0	0	0	0.0461386	0	0	0	0	0	0	0	0	0	0	0	0	0	0	0
OTU473	d__Bacteria;p__Planctomycetota;c__Planctomycetes;o__Planctomycetales;f__Rubinisphaeraceae;g__Planctomicrobium;s__uncultured_bacterium	0.00563031	0	0	0	0	0	0	0	0	0	0.00447788	0	0	0.0100118	0.00580799	0.131317	0	0	0	0	0	0	0	0	0	0	0	0	0	0	0
OTU474	d__Bacteria;p__Planctomycetota;c__Planctomycetes;o__Planctomycetales;f__Rubinisphaeraceae;g__uncultured;__	0	0	0	0	0	0	0	0	0	0	0	0	0	0.00500592	0	0.0354912	0	0	0	0	0	0	0	0	0	0	0	0	0	0	0
OTU475	d__Bacteria;p__Planctomycetota;c__Planctomycetes;o__Planctomycetales;f__Rubinisphaeraceae;g__uncultured;s__uncultured_organism	0	0	0	0	0	0	0	0	0	0	0	0	0	0.0116805	0	0.0212947	0	0	0.0151492	0	0	0	0	0	0	0	0	0	0	0	0
OTU476	d__Bacteria;p__Planctomycetota;c__Planctomycetes;o__Planctomycetales;f__Rubinisphaeraceae;g__uncultured;s__uncultured_planctomycete	0.00422274	0	0	0	0	0	0	0	0	0	0	0	0	0.00834321	0.00580799	0.0212947	0	0	0	0	0	0	0	0	0	0	0	0	0	0	0
OTU477	d__Bacteria;p__Planctomycetota;c__Planctomycetes;o__Planctomycetales;f__uncultured;g__uncultured;__	0	0	0	0	0	0	0	0	0	0	0	0	0	0	0	0	0	0	0	0	0	0	0.230503	0	0	0	0	0	0	0	0
OTU478	d__Bacteria;p__Planctomycetota;c__Planctomycetes;o__Planctomycetales;f__uncultured;g__uncultured;s__uncultured_Planctomyces	0	0	0	0	0	0	0	0	0	0	0	0	0	0	0	0	0	0	0	0	0	0	0.307338	0	0	0	0	0	0	0	0
OTU479	d__Bacteria;p__Planctomycetota;c__Planctomycetes;o__Planctomycetales;f__uncultured;g__uncultured;s__uncultured_Planctomycetales	0	0	0	0	0	0	0	0	0	0	0	0	0	0	0	0	0	0	0	0	0	0	0.230503	0	0	0	0	0	0	0	0
OTU480	d__Bacteria;p__Planctomycetota;c__Planctomycetes;o__Planctomycetales;f__uncultured;g__uncultured;s__uncultured_bacterium	0	0	0	0	0	0	0	0	0	0	0.00447788	0	0	0	0	0	0	0	0	0	0	0	0.422589	0	0	0	0	0	0	0	0
OTU481	d__Bacteria;p__Planctomycetota;c__vadinHA49;o__vadinHA49;f__vadinHA49;g__vadinHA49;s__uncultured_bacterium	0.00703789	0	0	0	0	0	0.0111514	0	0	0.0153343	0	0	0.00485543	0.046722	0.0290399	0.0532368	0	0	0.049235	0	0	0	0	0	0	0	0	0	0	0	0
OTU482	d__Bacteria;p__Proteobacteria;__;__;__;__;__	0	0	0	0	0	0	0	0	0	0	0	0	0	0	0	0.00709824	0	0	0	0	0	0	0	0	0	0	0	0	0	0	0
OTU483	d__Bacteria;p__Proteobacteria;c__Alphaproteobacteria;__;__;__;__	0.00563031	0	0	0.0145144	0.111631	0	0	0	0	0.0817829	0	0.00334571	0.0704037	0.0216923	0.021296	0.305224	0.019475	0	0	0	0	0	0	0	0	0	0	0	0.00842673	0	0
OTU484	d__Bacteria;p__Proteobacteria;c__Alphaproteobacteria;o__AT-s3-44;f__AT-s3-44;g__AT-s3-44;s__uncultured_Alphaproteobacteria	0	0	0	0	0	0	0	0	0	0	0	0	0	0	0	0.0106474	0	0	0	0	0	0	0	0	0	0	0	0	0	0	0
OTU485	d__Bacteria;p__Proteobacteria;c__Alphaproteobacteria;o__AT-s3-44;f__AT-s3-44;g__AT-s3-44;s__uncultured_marine	0	0	0	0	0	0	0	0	0	0	0	0	0	0	0	0	0	0	0	0	0	0	0	0	0	0	0	0.0105664	0	0	0
OTU486	d__Bacteria;p__Proteobacteria;c__Alphaproteobacteria;o__Caulobacterales;f__Caulobacteraceae;g__Brevundimonas;__	0	0	0	0	0	0	0	0	0	0	0	0	0	0	0	0	0	0	0	0.0610128	0	0	0	0	0	0	0	0	0	0	0
OTU487	d__Bacteria;p__Proteobacteria;c__Alphaproteobacteria;o__Caulobacterales;f__Caulobacteraceae;g__Phenylobacterium;__	0	0	0	0	0	0	0	0	0	0	0	0	0	0	0	0	0	0	0	0.294895	0	0	0	0	0	0	0	0	0	0	0
OTU488	d__Bacteria;p__Proteobacteria;c__Alphaproteobacteria;o__Caulobacterales;f__Hyphomonadaceae;__;__	0	0	0	0	0	0	0	0	0.00322945	0	0	0	0	0.0183551	0.015488	0	0	0	0	0	0	0	0	0	0	0	0	0	0	0	0.0240327
OTU489	d__Bacteria;p__Proteobacteria;c__Alphaproteobacteria;o__Caulobacterales;f__Hyphomonadaceae;g__Hellea;__	0	0	0	0	0	0.0115323	0	0	0	0	0	0	0.0242771	0	0	0.0390403	0	0	0	0	0	0	0	0	0	0	0	0	0	0	0
OTU490	d__Bacteria;p__Proteobacteria;c__Alphaproteobacteria;o__Caulobacterales;f__Hyphomonadaceae;g__Hirschia;__	0	0	0	0	0	0	0	0	0	0	0	0	0	0.0283669	0	0	0	0	0	0	0	0	0	0	0	0	0	0	0	0	0
OTU491	d__Bacteria;p__Proteobacteria;c__Alphaproteobacteria;o__Caulobacterales;f__Hyphomonadaceae;g__Hirschia;s__Hirschia_baltica	0	0	0	0	0	0	0	0	0	0	0.00895576	0	0	0	0	0	0	0	0	0	0	0	0	0	0	0	0	0	0	0	0
OTU492	d__Bacteria;p__Proteobacteria;c__Alphaproteobacteria;o__Caulobacterales;f__Hyphomonadaceae;g__Hyphomonas;__	0	0	0	0	0	0	0	0	0	0	0.0111947	0	0	0.0216923	0	0	0	0	0	0	0	0	0	0	0	0	0	0	0	0	0
OTU493	d__Bacteria;p__Proteobacteria;c__Alphaproteobacteria;o__Caulobacterales;f__Hyphomonadaceae;g__Litorimonas;s__Litorimonas_cladophorae	0	0	0	0	0	0	0	0	0	0	0	0	0	0	0	0	0	0	0	0	0	0	0	0	0	0	0	0	0.0379203	0	0
OTU494	d__Bacteria;p__Proteobacteria;c__Alphaproteobacteria;o__Caulobacterales;f__Hyphomonadaceae;g__Maricaulis;s__Maricaulis_maris	0	0	0	0	0	0	0	0	0	0	0.0179115	0	0	0	0	0	0	0	0	0	0	0	0	0	0	0	0	0	0	0	0
OTU495	d__Bacteria;p__Proteobacteria;c__Alphaproteobacteria;o__Caulobacterales;f__Hyphomonadaceae;g__Ponticaulis;__	0	0	0	0	0	0	0	0	0	0	0	0	0	0.0333728	0	0	0	0	0	0	0	0	0	0	0	0	0	0	0	0	0
OTU496	d__Bacteria;p__Proteobacteria;c__Alphaproteobacteria;o__Caulobacterales;f__Hyphomonadaceae;g__Ponticaulis;s__Ponticaulis_koreensis	0	0	0	0	0	0	0	0.0026059	0	0	0.00671682	0	0	0	0	0	0	0	0	0	0	0	0	0	0	0	0	0	0	0	0
OTU497	d__Bacteria;p__Proteobacteria;c__Alphaproteobacteria;o__Caulobacterales;f__Hyphomonadaceae;g__Robiginitomaculum;__	0.0211137	0	0	0	0	0	0	0	0	0	0.0156726	0	0	0	0	0	0	0	0	0	0	0	0	0	0	0	0	0	0	0	0
OTU498	d__Bacteria;p__Proteobacteria;c__Alphaproteobacteria;o__Caulobacterales;f__Hyphomonadaceae;g__Robiginitomaculum;s__uncultured_Alphaproteobacteria	0	0	0	0.632413	0	0	0	0	0	0	0	0.0200743	0	0	0	0.276831	0	0	0	0	0	0	0	0	0	0	0	0.0457875	0	0	0.0720981
OTU499	d__Bacteria;p__Proteobacteria;c__Alphaproteobacteria;o__Caulobacterales;f__Hyphomonadaceae;g__uncultured;s__uncultured_Alphaproteobacteria	0	0	0	0	0	0	0	0	0	0	0	0	0	0	0	0.0816298	0	0	0	0	0	0	0	0	0	0	0	0	0	0	0.036049
OTU500	d__Bacteria;p__Proteobacteria;c__Alphaproteobacteria;o__Caulobacterales;f__Hyphomonadaceae;g__uncultured;s__uncultured_bacterium	0	0	0	0	0	0	0	0	0	0	0	0.0122676	0.00728314	0	0	0.28038	0	0	0	0	0	0	0	0	0	0	0	0	0	0	0
OTU501	d__Bacteria;p__Proteobacteria;c__Alphaproteobacteria;o__Caulobacterales;f__Parvularculaceae;g__Amphiplicatus;__	0	0	0	0	0	0	0	0	0	0	0	0.00669142	0	0	0	0	0	0	0	0	0	0	0	0	0	0	0	0	0	0	0
OTU502	d__Bacteria;p__Proteobacteria;c__Alphaproteobacteria;o__Caulobacterales;f__Parvularculaceae;g__Marinicaulis;s__uncultured_bacterium	0	0	0	0	0	0	0	0	0	0	0	0.00446095	0	0	0.0561439	0.102924	0	0	0	0	0	0	0	0	0	0	0	0	0	0	0.0160218
OTU503	d__Bacteria;p__Proteobacteria;c__Alphaproteobacteria;o__Caulobacterales;f__Parvularculaceae;g__Parvularcula;__	0	0	0	0	0	0	0	0	0	0	0.0201505	0	0	0	0	0	0	0	0	0	0	0	0	0	0	0	0	0	0	0	0
OTU504	d__Bacteria;p__Proteobacteria;c__Alphaproteobacteria;o__Defluviicoccales;f__uncultured;g__uncultured;__	0.00422274	0	0	0	0	0	0	0	0	0	0	0	0	0	0	0.0141965	0	0	0	0	0	0	0	0	0	0	0	0	0	0	0.0440599
OTU505	d__Bacteria;p__Proteobacteria;c__Alphaproteobacteria;o__Defluviicoccales;f__uncultured;g__uncultured;s__hydrothermal_vent	0	0	0	0	0	0	0	0	0	0	0.00895576	0	0	0	0.00387199	0	0	0	0	0	0	0	0	0	0	0	0	0	0	0	0
OTU506	d__Bacteria;p__Proteobacteria;c__Alphaproteobacteria;o__Defluviicoccales;f__uncultured;g__uncultured;s__uncultured_Alphaproteobacteria	0	0	0	0	0	0	0	0	0	0	0	0	0	0	0	0	0	0	0	0.0406752	0	0	0	0	0	0	0	0	0	0	0
OTU507	d__Bacteria;p__Proteobacteria;c__Alphaproteobacteria;o__Kiloniellales;f__Kiloniellaceae;__;__	0	0	0	0	0	0	0	0	0	0	0	0	0	0	0	0.141965	0	0	0	0	0	0	0	0	0	0	0	0	0	0	0
OTU508	d__Bacteria;p__Proteobacteria;c__Alphaproteobacteria;o__Kiloniellales;f__Kiloniellaceae;g__Pelagibius;__	0	0	0	0	0	0	0	0	0	0	0	0	0	0.00500592	0	0.0354912	0	0	0	0	0	0	0	0	0	0	0	0	0	0	0
OTU509	d__Bacteria;p__Proteobacteria;c__Alphaproteobacteria;o__Kiloniellales;f__Kiloniellaceae;g__Pelagibius;s__uncultured_bacterium	0	0	0	0	0	0	0	0	0	0	0	0	0	0.00667456	0	0.117121	0.01558	0	0.0189365	0	0	0	0	0	0	0	0	0	0	0	0
OTU510	d__Bacteria;p__Proteobacteria;c__Alphaproteobacteria;o__Kiloniellales;f__Kiloniellaceae;g__uncultured;__	0	0	0	0	0	0	0	0	0	0	0	0	0	0.00500592	0.00580799	0.060335	0	0	0	0	0	0	0	0	0	0	0	0	0	0	0
OTU511	d__Bacteria;p__Proteobacteria;c__Alphaproteobacteria;o__Kiloniellales;f__Kiloniellaceae;g__uncultured;s__uncultured_Rhodospirillaceae	0	0	0	0	0	0	0	0	0	0	0	0	0	0	0	0.028393	0	0	0	0	0	0	0	0	0	0	0	0	0	0	0
OTU512	d__Bacteria;p__Proteobacteria;c__Alphaproteobacteria;o__Kiloniellales;f__Kiloniellaceae;g__uncultured;s__uncultured_deep-sea	0	0	0	0	0	0	0	0	0	0	0	0	0	0	0	0.028393	0	0	0	0	0	0	0	0	0	0	0	0	0	0	0
OTU513	d__Bacteria;p__Proteobacteria;c__Alphaproteobacteria;o__Kiloniellales;f__Kiloniellaceae;g__uncultured;s__uncultured_organism	0	0	0	0	0	0	0	0	0	0	0	0	0	0	0	0.0851789	0	0	0	0	0	0	0	0	0	0	0	0	0	0	0
OTU514	d__Bacteria;p__Proteobacteria;c__Alphaproteobacteria;o__Kordiimonadales;f__Kordiimonadaceae;g__Kordiimonas;__	0	0	0	0	0	0	0	0	0	0	0	0.0200743	0	0	0	0.0461386	0	0	0	0	0	0	0	0	0	0	0	0	0	0	0.0120163
OTU515	d__Bacteria;p__Proteobacteria;c__Alphaproteobacteria;o__Kordiimonadales;f__Kordiimonadaceae;g__Kordiimonas;s__uncultured_bacterium	0	0	0	0	0	0	0	0	0	0	0	0	0	0	0	0.0177456	0	0	0	0	0	0	0	0	0	0	0	0	0	0	0
OTU516	d__Bacteria;p__Proteobacteria;c__Alphaproteobacteria;o__Kordiimonadales;f__uncultured;g__uncultured;__	0	0	0	0	0	0.00768817	0	0	0	0.0153343	0	0	0	0	0	0	0	0	0.0265111	0	0	0	0	0	0	0	0	0	0	0	0
OTU517	d__Bacteria;p__Proteobacteria;c__Alphaproteobacteria;o__Kordiimonadales;f__uncultured;g__uncultured;s__uncultured_Alphaproteobacteria	0.00985305	0	0	0.0165879	0.0128805	0	0	0	0	0	0.00895576	0.00780666	0	0.118474	0.180048	0.0816298	0	0	0	0	0	0	0	0	0	0	0	0	0.0337069	0.040004	0.128174
OTU518	d__Bacteria;p__Proteobacteria;c__Alphaproteobacteria;o__Kordiimonadales;f__uncultured;g__uncultured;s__uncultured_bacterium	0.00844547	0.00539491	0.0356799	0.0663515	0.025761	0.0269086	0.0947867	0	0.00484418	0	0	0.02342	0.0291326	0.0450533	0.0774398	0.156161	0.0233699	0.0191802	0.0113619	0.0610128	0	0	0	0	0	0.0567022	0	0	0	0.30003	0.116158
OTU519	d__Bacteria;p__Proteobacteria;c__Alphaproteobacteria;o__Micavibrionales;__;__;__	0	0	0	0	0	0	0	0	0	0	0	0	0	0.00500592	0	0	0	0	0	0	0	0	0	0	0	0	0	0	0	0	0
OTU520	d__Bacteria;p__Proteobacteria;c__Alphaproteobacteria;o__Micavibrionales;f__Micavibrionaceae;g__uncultured;__	0.00703789	0	0	0	0	0	0	0	0	0	0	0	0	0.0133491	0	0	0	0	0	0	0	0	0	0	0	0	0	0	0.0294936	0	0
OTU521	d__Bacteria;p__Proteobacteria;c__Alphaproteobacteria;o__Micavibrionales;f__Micavibrionaceae;g__uncultured;s__uncultured_bacterium	0.00844547	0	0	0	0	0	0	0	0	0	0.00447788	0.00223047	0.00971086	0.046722	0.023232	0.16326	0	0	0	0	0	0	0	0	0	0	0	0	0	0	0
OTU522	d__Bacteria;p__Proteobacteria;c__Alphaproteobacteria;o__Micavibrionales;f__Micavibrionaceae;g__uncultured;s__uncultured_organism	0	0	0	0	0	0	0	0	0	0	0	0	0	0	0	0.0141965	0	0	0	0	0	0	0	0	0	0	0	0	0	0	0
OTU523	d__Bacteria;p__Proteobacteria;c__Alphaproteobacteria;o__Micavibrionales;f__uncultured;g__uncultured;__	0	0	0	0.00414697	0	0	0	0	0	0	0	0	0.00485543	0.0266983	0.011616	0.0745315	0	0	0	0	0	0	0	0	0	0	0	0	0	0	0
OTU524	d__Bacteria;p__Proteobacteria;c__Alphaproteobacteria;o__Micavibrionales;f__uncultured;g__uncultured;s__uncultured_bacterium	0	0	0	0	0	0	0	0	0	0	0	0.00334571	0	0	0	0.0141965	0	0	0	0	0	0	0	0	0	0	0	0	0	0	0
OTU525	d__Bacteria;p__Proteobacteria;c__Alphaproteobacteria;o__Parvibaculales;f__OCS116_clade;g__OCS116_clade;__	0	0	0	0	0	0.046129	0	0	0	0	0.00671682	0	0	0	0.00967998	0	0	0	0	0	0.0402739	0	0	0	0	0	0	0.00704424	0	0	0
OTU526	d__Bacteria;p__Proteobacteria;c__Alphaproteobacteria;o__Parvibaculales;f__PS1_clade;g__PS1_clade;__	0.670007	0.377644	0.301495	0	5.36259	1.08403	3.35099	0.126386	0.58776	5.77591	0	0.0434943	2.17038	0.0483906	0.857646	0.191652	1.03996	0.315103	0.128768	0.203376	0.241643	0.253879	0	0.0486697	0	0.408256	0.0786836	0.0316991	0.0421336	0.135014	0.0680926
OTU527	d__Bacteria;p__Proteobacteria;c__Alphaproteobacteria;o__Parvibaculales;f__PS1_clade;g__PS1_clade;s__uncultured_Mesorhizobium	0	0	0	0	0	0	0	0	0	0	0.00447788	0	0	0	0	0.0780806	0	0	0	0	0	0	0	0	0	0	0	0	0	0	0
OTU528	d__Bacteria;p__Proteobacteria;c__Alphaproteobacteria;o__Parvibaculales;f__PS1_clade;g__PS1_clade;s__uncultured_Pseudovibrio	0	0	0	0	0	0	0	0.00390885	0	0	0	0	0	0.0133491	0	0	0	0	0	0	0	0	0	0	0	0	0	0	0.0379203	0.030003	0
OTU529	d__Bacteria;p__Proteobacteria;c__Alphaproteobacteria;o__Parvibaculales;f__PS1_clade;g__PS1_clade;s__uncultured_bacterium	0	0	0	0	0	0	0	0	0	0	0	0	0	0.00834321	0.013552	0.124219	0	0	0	0	0	0	0	0	0.0166325	0	0	0	0	0	0
OTU530	d__Bacteria;p__Proteobacteria;c__Alphaproteobacteria;o__Parvibaculales;f__Parvibaculaceae;g__uncultured;__	0	0	0	0	0	0	0	0	0	0	0	0	0	0	0	0	0	0	0	0	0	0	0	0	0	0.0226809	0	0	0	0	0
OTU531	d__Bacteria;p__Proteobacteria;c__Alphaproteobacteria;o__Parvibaculales;f__Parvibaculaceae;g__uncultured;s__uncultured_Alphaproteobacteria	0	0	0	0	0	0	0	0	0	0	0	0.00780666	0	0	0	0.110023	0	0	0	0	0	0	0	0	0	0	0	0	0	0	0.0240327
OTU532	d__Bacteria;p__Proteobacteria;c__Alphaproteobacteria;o__Parvibaculales;f__Parvibaculales;g__Parvibaculales;s__uncultured_bacterium	0	0	0	0	0	0	0	0	0	0	0	0	0	0	0	0.00709824	0	0	0	0	0	0	0	0	0	0	0	0	0	0	0
OTU533	d__Bacteria;p__Proteobacteria;c__Alphaproteobacteria;o__Puniceispirillales;f__SAR116_clade;g__SAR116_clade;__	0	0	0	0	0	0	0	0	0.00968836	0	0	0	0	0	0	0	0	0	0	0	0	0	0	0	0	0	0	0	0	0	0
OTU534	d__Bacteria;p__Proteobacteria;c__Alphaproteobacteria;o__Puniceispirillales;f__SAR116_clade;g__SAR116_clade;s__uncultured_Pelagibacterales	0	0	0.0196239	0.0435432	0	0.0807258	0.0613326	0	0	0.0255571	0.0111947	0.0156133	0	0.00667456	0.0483999	0	0.0311599	0.0164402	0	0.132194	0.0402739	0	0	0.0486697	0.0277208	0	0	0	0	0.215022	0.0200272
OTU535	d__Bacteria;p__Proteobacteria;c__Alphaproteobacteria;o__Puniceispirillales;f__uncultured;g__uncultured;s__uncultured_bacterium	0	0	0	0	0	0	0	0	0	0	0	0	0	0	0	0.0177456	0	0	0	0	0	0	0	0	0	0	0	0	0	0	0
OTU536	d__Bacteria;p__Proteobacteria;c__Alphaproteobacteria;o__Reyranellales;f__Reyranellaceae;g__uncultured;__	0	0	0	0	0	0	0	0	0	0	0	0	0	0	0	0	0	0	0	0	0	0	0.0768344	0	0	0	0	0	0	0	0
OTU537	d__Bacteria;p__Proteobacteria;c__Alphaproteobacteria;o__Rhizobiales;__;__;__	0.00563031	0	0	0	0	0	0	0	0	0.0255571	0.00671682	0.00446095	0	0.0116805	0.00774398	0.589154	0	0	0.0189365	0	0	0	0	0	0	0	0	0	0	0	0.0921253
OTU538	d__Bacteria;p__Proteobacteria;c__Alphaproteobacteria;o__Rhizobiales;f__Beijerinckiaceae;g__Methylobacterium-Methylorubrum;__	0	0	0	0	0	0	0	0	0	0	0	0	0	0	0	0	0	0	0	0.0203376	0	0	0	0	0	0	0	0	0	0	0
OTU539	d__Bacteria;p__Proteobacteria;c__Alphaproteobacteria;o__Rhizobiales;f__Beijerinckiaceae;g__Methylobacterium-Methylorubrum;s__Methylobacterium_gossipiicola	0	0	0	0	0	0	0	0	0	0	0	0	0	0	0	0	0	0	0	0.0305064	0	0	0	0	0	0	0	0	0	0	0
OTU540	d__Bacteria;p__Proteobacteria;c__Alphaproteobacteria;o__Rhizobiales;f__Devosiaceae;g__Devosia;__	0	0	0	0	0	0	0	0	0	0	0	0	0	0	0	0	0	0	0	0.0203376	0	0	0	0	0	0	0	0	0	0	0
OTU541	d__Bacteria;p__Proteobacteria;c__Alphaproteobacteria;o__Rhizobiales;f__Hyphomicrobiaceae;g__Filomicrobium;s__uncultured_Alphaproteobacteria	0.00844547	0	0	0	0	0	0	0	0	0.117563	0	0.00446095	0.033988	0.00667456	0.00774398	0.294577	0.0233699	0	0.0530223	0	0	0	0	0	0	0	0	0	0	0	0.0160218
OTU542	d__Bacteria;p__Proteobacteria;c__Alphaproteobacteria;o__Rhizobiales;f__Hyphomicrobiaceae;g__Filomicrobium;s__uncultured_Rhizobiales	0	0	0	0	0	0	0	0.00390885	0	0	0.0246283	0	0	0	0	0	0	0	0	0	0	0	0	0	0	0	0	0	0	0	0
OTU543	d__Bacteria;p__Proteobacteria;c__Alphaproteobacteria;o__Rhizobiales;f__Methyloligellaceae;g__Methyloceanibacter;s__uncultured_bacterium	0	0	0	0	0	0	0	0	0	0	0	0	0	0	0	0.0141965	0	0	0	0	0	0	0	0	0	0	0	0	0	0	0
OTU544	d__Bacteria;p__Proteobacteria;c__Alphaproteobacteria;o__Rhizobiales;f__Methyloligellaceae;g__uncultured;s__alpha_proteobacterium	0	0	0	0	0	0	0	0.00781769	0	0	0.0223894	0	0	0	0	0	0	0	0	0	0	0	0	0	0	0	0	0	0	0	0
OTU545	d__Bacteria;p__Proteobacteria;c__Alphaproteobacteria;o__Rhizobiales;f__Rhizobiaceae;__;__	0	0	0	0	0	0	0	0	0	0.00511143	0	0	0	0	0	0	0	0	0	0.0203376	0	0	0	0	0	0	0	0	0	0	0
OTU546	d__Bacteria;p__Proteobacteria;c__Alphaproteobacteria;o__Rhizobiales;f__Rhizobiaceae;g__Allorhizobium-Neorhizobium-Pararhizobium-Rhizobium;__	0	0	0	0	0	0	0	0	0	0	0	0	0	0	0	0	0	0	0	0.355908	0	0	0	0	0	0	0	0	0	0	0
OTU547	d__Bacteria;p__Proteobacteria;c__Alphaproteobacteria;o__Rhizobiales;f__Rhizobiaceae;g__Cohaesibacter;s__marine_metagenome	0	0	0	0	0	0	0	0	0	0	0	0	0	0	0.00774398	0	0	0	0	0	0	0	0	0	0	0	0	0	0	0	0
OTU548	d__Bacteria;p__Proteobacteria;c__Alphaproteobacteria;o__Rhizobiales;f__Rhizobiaceae;g__Lentilitoribacter;s__uncultured_bacterium	0.0619334	0	0	0	0	0	0	0	0	0	0	0	0	0	0	0.191652	0	0	0	0	0	0	0	0	0	0	0	0	0	0	0
OTU549	d__Bacteria;p__Proteobacteria;c__Alphaproteobacteria;o__Rhizobiales;f__Rhizobiaceae;g__Pseudahrensia;__	0	0	0	0.00829394	0	0	0	0	0	0.0460029	0.0156726	0.00780666	0.0461266	0	0	1.00795	0	0	0	0	0	0	0	0	0	0	0	0	0	0	0.0320436
OTU550	d__Bacteria;p__Proteobacteria;c__Alphaproteobacteria;o__Rhizobiales;f__Rhizobiaceae;g__Pseudahrensia;s__uncultured_Alphaproteobacteria	0	0	0	0	0	0	0	0	0	0	0.367186	0	0	0	0	0	0	0	0	0	0	0	0	0	0	0	0	0	0	0	0
OTU551	d__Bacteria;p__Proteobacteria;c__Alphaproteobacteria;o__Rhizobiales;f__Rhizobiaceae;g__Pseudahrensia;s__uncultured_bacterium	0.0197061	0	0	0	0	0	0	0	0	0	0.0179115	0	0.0534097	0.046722	0.0348479	0.369108	0.0272649	0	0.037873	0	0	0	0	0	0	0	0	0	0	0	0.0961307
OTU552	d__Bacteria;p__Proteobacteria;c__Alphaproteobacteria;o__Rhizobiales;f__Rhizobiaceae;g__uncultured;s__uncultured_bacterium	0	0	0	0	0	0	0	0	0	0.0306686	0	0	0.0145663	0	0	1.07893	0	0	0	0	0	0	0	0	0	0	0	0	0	0	0.0400545
OTU553	d__Bacteria;p__Proteobacteria;c__Alphaproteobacteria;o__Rhizobiales;f__Xanthobacteraceae;g__Bradyrhizobium;__	0	0	0	0	0	0	0	0	0	0	0	0	0	0	0	0	0	0	0	0.122026	0	0	0	0	0	0	0	0	0	0	0
OTU554	d__Bacteria;p__Proteobacteria;c__Alphaproteobacteria;o__Rhodobacterales;f__Rhodobacteraceae;__;__	0.0844547	0.431593	0	0.00207348	0.364948	1.19551	0.446055	0.0912064	0.148555	0.153343	0.501522	0.0669142	0.0606929	1.04123	0.753102	3.79756	0.0895848	0.295923	0.0530223	0.193207	0	0	0	0.113563	0.0776182	0	0.0102631	1.63426	0.122188	0.130013	1.04142
OTU555	d__Bacteria;p__Proteobacteria;c__Alphaproteobacteria;o__Rhodobacterales;f__Rhodobacteraceae;g__Amylibacter;__	0	0.0350669	0.0891997	0.244671	0.042935	0.10379	0.44048	0	0	0.424249	0.0447788	0.0836428	0.104392	0.0450533	0.120032	0.0496877	0.0584249	0.0164402	0	1.02705	0.201369	0.282087	0.461007	0.146009	0.321561	0.102064	0.0889467	0.176106	0	0.890089	0.0320436
OTU556	d__Bacteria;p__Proteobacteria;c__Alphaproteobacteria;o__Rhodobacterales;f__Rhodobacteraceae;g__Ascidiaceihabitans;__	0	0	0	0	0	0.0538172	0.223028	0	0	0	0	0.0267657	0	0	0	0	0	0	0	0	0.134246	0	0	0	0	0	0	0	0	0	0
OTU557	d__Bacteria;p__Proteobacteria;c__Alphaproteobacteria;o__Rhodobacterales;f__Rhodobacteraceae;g__Limibaculum;__	0	0	0	0	0	0	0	0	0	0	0	0	0	0	0	0	0	0	0	0	0	0	0.115252	0	0	0	0	0	0	0	0
OTU558	d__Bacteria;p__Proteobacteria;c__Alphaproteobacteria;o__Rhodobacterales;f__Rhodobacteraceae;g__Litoreibacter;__	0	0	0	0	0	0	0	0	0	0	0	0	0	0.0100118	0	0.149063	0	0	0	0	0	0	0	0	0	0	0	0	0	0	0
OTU559	d__Bacteria;p__Proteobacteria;c__Alphaproteobacteria;o__Rhodobacterales;f__Rhodobacteraceae;g__Litoreibacter;s__uncultured_Alphaproteobacteria	0	0	0	0	0	0	0	0	0	0	0	0	0	0	0	0.188103	0	0	0	0	0	0	0	0	0	0	0	0	0	0	0
OTU560	d__Bacteria;p__Proteobacteria;c__Alphaproteobacteria;o__Rhodobacterales;f__Rhodobacteraceae;g__Octadecabacter;s__uncultured_bacterium	0	0.0134873	0	0	0	0	0	0	0.00645891	0	0	0	0	0	0.013552	0	0	0	0	0	0	0	0	0	0.0221766	0	0	0	0	0	0
OTU561	d__Bacteria;p__Proteobacteria;c__Alphaproteobacteria;o__Rhodobacterales;f__Rhodobacteraceae;g__Planktomarina;__	0	0.172637	0.0695758	0.240524	0.145979	0.780349	0.802899	0	0.0726627	0.1789	0.170159	0.0758361	0.0267049	0.0600711	0.431727	0.0851789	0.10906	0	0.0302984	1.83038	0.402739	0	0	0.373134	0.166325	0	0	0.126796	0	1.06511	0
OTU562	d__Bacteria;p__Proteobacteria;c__Alphaproteobacteria;o__Rhodobacterales;f__Rhodobacteraceae;g__Pseudophaeobacter;__	0	0	0	0	0	0	0	0	0	0	0	0	0	0.00834321	0	0	0	0	0	0	0	0	0	0	0	0	0	0	0	0	0
OTU563	d__Bacteria;p__Proteobacteria;c__Alphaproteobacteria;o__Rhodobacterales;f__Rhodobacteraceae;g__Roseobacter_clade_NAC11-7_lineage;__	0	0	0	0	0	0	0	0	0	0	0	0	0	0	0.00580799	0	0	0	0	0	0	0	0	0	0	0	0	0	0	0	0
OTU564	d__Bacteria;p__Proteobacteria;c__Alphaproteobacteria;o__Rhodobacterales;f__Rhodobacteraceae;g__Ruegeria;__	0	0	0	0	0	0	0	0	0	0	0.0134336	0	0	0	0	0	0	0	0	0	0	0	0	0	0	0	0	0	0	0	0
OTU565	d__Bacteria;p__Proteobacteria;c__Alphaproteobacteria;o__Rhodobacterales;f__Rhodobacteraceae;g__Sulfitobacter;__	0.147796	1.58341	0.0160559	0.188687	1.35675	3.94403	1.76749	0.289255	0.52963	0.541811	1.02096	0.2342	0.0898254	0.949457	2.45291	1.16056	0.393394	0.775427	0.185578	1.12874	0.255068	0.733427	2.26662	1.817	1.60226	0.612384	0.605522	1.23274	0	0.545055	0.8091
OTU566	d__Bacteria;p__Proteobacteria;c__Alphaproteobacteria;o__Rhodobacterales;f__Rhodobacteraceae;g__Yoonia-Loktanella;__	0.00985305	0	0	0	0	0	0.0278784	0	0	0	0	0	0.00485543	0.0133491	0	0.0780806	0	0	0	0	0	0	0	0	0	0	0	0	0.0210668	0	0
OTU567	d__Bacteria;p__Proteobacteria;c__Alphaproteobacteria;o__Rhodobacterales;f__Rhodobacteraceae;g__uncultured;__	0	0	0	0.0186614	0	0	0	0	0	0	0	0	0	0.00333728	0	0.209398	0	0	0	0	0	0	0	0	0	0	0	0	0	0	0.0761035
OTU568	d__Bacteria;p__Proteobacteria;c__Alphaproteobacteria;o__Rhodobacterales;f__Rhodobacteraceae;g__uncultured;s__uncultured_delta	0	0	0	0	0	0	0	0	0	0.0102229	0	0	0	0	0	0	0	0	0	0	0	0	0	0	0	0	0	0	0	0	0
OTU569	d__Bacteria;p__Proteobacteria;c__Alphaproteobacteria;o__Rhodospirillales;f__AEGEAN-169_marine_group;g__AEGEAN-169_marine_group;__	0	0	0	0	0	0	0	0	0	0	0	0	0	0	0	0	0	0	0	0	0	0	0	0	0	0	0	0.0176106	0	0	0
OTU570	d__Bacteria;p__Proteobacteria;c__Alphaproteobacteria;o__Rhodospirillales;f__Magnetospiraceae;g__Magnetospira;s__uncultured_Alphaproteobacteria	0	0	0	0	0	0	0	0	0	0	0	0	0	0.00500592	0.011616	0.0248438	0	0	0.0227238	0	0	0	0	0	0	0	0	0	0	0	0.0240327
OTU571	d__Bacteria;p__Proteobacteria;c__Alphaproteobacteria;o__Rhodospirillales;f__Magnetospiraceae;g__Magnetospira;s__uncultured_marine	0.00703789	0.0107898	0.00356799	0.0145144	0	0.0384408	0.178422	0.00521179	0.00645891	0.0306686	0.0201505	0.018959	0.0242771	0.00834321	0.0271039	0.0390403	0.0233699	0	0	0.050844	0	0	0	0.0648929	0.0554416	0	0	0	0	0.120012	0.0160218
OTU572	d__Bacteria;p__Proteobacteria;c__Alphaproteobacteria;o__Rhodospirillales;f__Magnetospiraceae;g__uncultured;__	0	0	0	0	0	0	0	0	0	0	0	0	0	0.00500592	0.013552	0.0425894	0.0311599	0	0.0151492	0	0	0	0	0	0	0	0	0	0	0.040004	0
OTU573	d__Bacteria;p__Proteobacteria;c__Alphaproteobacteria;o__Rhodospirillales;f__Magnetospiraceae;g__uncultured;s__uncultured_deep-sea	0	0	0	0	0	0	0	0	0	0	0	0	0	0	0	0.0177456	0	0	0	0	0	0	0	0	0	0	0	0	0	0	0
OTU574	d__Bacteria;p__Proteobacteria;c__Alphaproteobacteria;o__Rhodospirillales;f__Magnetospiraceae;g__uncultured;s__uncultured_marine	0	0	0	0	0.00858701	0	0	0	0	0	0	0	0	0	0.00774398	0.0248438	0	0	0	0	0	0	0	0	0	0	0	0	0	0	0
OTU575	d__Bacteria;p__Proteobacteria;c__Alphaproteobacteria;o__Rhodospirillales;f__Rhodospirillaceae;g__uncultured;s__uncultured_Alphaproteobacteria	0	0	0	0	0	0	0	0	0	0	0	0	0	0.00333728	0	0.0248438	0	0	0	0	0	0	0	0	0	0	0	0	0	0	0
OTU576	d__Bacteria;p__Proteobacteria;c__Alphaproteobacteria;o__Rhodospirillales;f__Terasakiellaceae;g__Terasakiella;__	0	0	0	0	0	0	0	0	0	0	0	0	0	0.023361	0	0	0	0	0	0	0	0	0	0	0	0	0	0	0	0	0
OTU577	d__Bacteria;p__Proteobacteria;c__Alphaproteobacteria;o__Rhodospirillales;f__Terasakiellaceae;g__uncultured;__	0	0	0	0	0	0	0.0278784	0	0	0	0	0	0	0	0	0	0	0	0	0	0	0	0	0	0	0	0	0	0	0	0
OTU578	d__Bacteria;p__Proteobacteria;c__Alphaproteobacteria;o__Rhodospirillales;f__Terasakiellaceae;g__uncultured;s__uncultured_Alphaproteobacteria	0	0	0	0	0.00858701	0	0	0	0	0.0255571	0	0	0.0922532	0	0	0	0	0	0	0	0	0	0	0	0	0	0	0	0	0	0.0120163
OTU579	d__Bacteria;p__Proteobacteria;c__Alphaproteobacteria;o__Rhodospirillales;f__Terasakiellaceae;g__uncultured;s__uncultured_bacterium	0	0	0	0	0	0	0.0334541	0	0	0	0	0.00446095	0	0	0	0	0	0	0	0.0406752	0.0268492	0	0	0	0	0	0	0	0	0	0
OTU580	d__Bacteria;p__Proteobacteria;c__Alphaproteobacteria;o__Rhodospirillales;f__uncultured;g__uncultured;s__uncultured_bacterium	0	0	0	0	0	0	0	0	0	0	0	0.00334571	0	0	0	0.0248438	0	0	0	0	0	0	0	0	0	0	0	0	0	0	0
OTU581	d__Bacteria;p__Proteobacteria;c__Alphaproteobacteria;o__Rhodospirillales;f__uncultured;g__uncultured;s__uncultured_gamma	0	0	0	0	0	0	0	0	0	0	0	0	0	0	0	0	0	0	0	0	0	0	0	0	0	0	0	0	0.0252802	0	0
OTU582	d__Bacteria;p__Proteobacteria;c__Alphaproteobacteria;o__Rickettsiales;__;__;__	0	0	0	0	0	0	0	0	0	0	0	0	0	0	0.00387199	0	0	0	0	0	0	0	0	0	0	0	0	0	0	0	0
OTU583	d__Bacteria;p__Proteobacteria;c__Alphaproteobacteria;o__Rickettsiales;f__AB1;g__AB1;__	0	0	0	0	0	0	0	0	0	0	0	0	0.00485543	0	0	0	0	0	0	0	0	0	0	0	0	0	0	0	0	0	0
OTU584	d__Bacteria;p__Proteobacteria;c__Alphaproteobacteria;o__Rickettsiales;f__Candidatus_Hepatincola;g__Candidatus_Hepatincola;s__Candidatus_Hepatincola	0	0	0	0	0.00858701	0	0	0	0	0	0	0	0	0	0.00774398	0	0	0	0	0	0	0	0	0	0	0	0	0	0	0	0
OTU585	d__Bacteria;p__Proteobacteria;c__Alphaproteobacteria;o__Rickettsiales;f__Fokiniaceae;g__MD3-55;__	0	0.00539491	0	0	0	0	0	0	0	0	0	0	0	0	0	0	0	0	0	0	0	0	0	0	0	0	0	0	0	0	0
OTU586	d__Bacteria;p__Proteobacteria;c__Alphaproteobacteria;o__Rickettsiales;f__Fokiniaceae;g__MD3-55;s__uncultured_bacterium	0	0	0.00891997	0	0	0	0	0	0	0	0	0	0	0	0	0	0	0	0	0	0	0	0	0	0	0	0.00684205	0	0	0	0
OTU587	d__Bacteria;p__Proteobacteria;c__Alphaproteobacteria;o__Rickettsiales;f__Rickettsiaceae;__;__	0	0	0	0	0	0	0	0	0	0	0	0	0.00971086	0	0	0	0	0	0	0	0	0	0	0	0	0	0	0	0	0	0
OTU588	d__Bacteria;p__Proteobacteria;c__Alphaproteobacteria;o__Rickettsiales;f__Rickettsiaceae;g__Candidatus_Megaira;__	0.00563031	0	0	0	0	0	0	0	0	0	0	0.00111524	0	0.0100118	0	0.0567859	0	0.0191802	0	0	0	0	0	0	0	0	0	0	0	0	0
OTU589	d__Bacteria;p__Proteobacteria;c__Alphaproteobacteria;o__Rickettsiales;f__Rickettsiaceae;g__Candidatus_Megaira;s__metagenome	0	0	0	0	0	0.0345968	0.0334541	0	0	0	0	0	0	0	0	0	0	0.0137001	0.0340857	0	0	0	0	0	0	0	0	0	0	0.0650065	0
OTU590	d__Bacteria;p__Proteobacteria;c__Alphaproteobacteria;o__Rickettsiales;f__Rickettsiaceae;g__Rickettsia;__	0	0	0	0	0	0	0	0	0	0	0	0	0	0	0.021296	0	0	0	0	0	0	0	0	0	0	0	0	0	0	0	0
OTU591	d__Bacteria;p__Proteobacteria;c__Alphaproteobacteria;o__Rickettsiales;f__Rickettsiaceae;g__uncultured;__	0	0	0	0	0	0	0	0	0	0	0	0	0	0	0	0.0177456	0	0	0	0	0	0	0	0	0	0	0	0	0	0	0
OTU592	d__Bacteria;p__Proteobacteria;c__Alphaproteobacteria;o__Rickettsiales;f__SM2D12;g__SM2D12;__	0	0	0	0	0	0	0	0	0	0	0	0	0	0.00500592	0	0	0	0	0	0	0	0	0	0	0	0	0	0	0	0	0
OTU593	d__Bacteria;p__Proteobacteria;c__Alphaproteobacteria;o__Rickettsiales;f__SM2D12;g__SM2D12;s__uncultured_bacterium	0	0	0	0	0	0	0	0	0	0	0	0	0	0	0	0.0141965	0	0	0	0	0	0	0	0	0	0	0	0	0	0	0
OTU594	d__Bacteria;p__Proteobacteria;c__Alphaproteobacteria;o__SAR11_clade;__;__;__	0	0	0	0	0	0	0	0	0	0	0	0	0	0	0	0	0.019475	0	0	0	0	0	0	0	0	0	0	0	0	0.050005	0
OTU595	d__Bacteria;p__Proteobacteria;c__Alphaproteobacteria;o__SAR11_clade;f__Clade_I;g__Clade_Ia;__	0.00703789	0.245468	0.178399	0.257112	0.24473	0.834166	0.68581	0.0925093	0.145325	0.14312	0.649292	0.115985	0.016994	0.145172	0.98155	0.0780806	0.175275	0.232902	0.0302984	2.74558	0.912874	0.197461	0.345755	0.827385	1.04785	0.158766	0.174472	0.48253	0	1.21512	0.408556
OTU596	d__Bacteria;p__Proteobacteria;c__Alphaproteobacteria;o__SAR11_clade;f__Clade_II;g__Clade_II;__	0	0	0	0.0456167	0.0300545	0	0	0	0	0	0.0313452	0.0100371	0	0	0.0561439	0	0	0	0	0.0813504	0	0	0	0	0.0887065	0	0	0	0	0	0
OTU597	d__Bacteria;p__Proteobacteria;c__Alphaproteobacteria;o__SAR11_clade;f__Clade_III;g__Clade_III;__	0	0	0	0	0	0	0	0	0	0	0.00447788	0	0	0	0.013552	0	0	0.00822008	0	0	0	0	0	0	0.0277208	0	0	0.0105664	0	0.0150015	0
OTU598	d__Bacteria;p__Proteobacteria;c__Alphaproteobacteria;o__SAR11_clade;f__Clade_IV;g__Clade_IV;s__marine_metagenome	0	0	0	0	0	0	0	0	0.00322945	0	0	0	0	0	0	0	0	0	0	0	0	0	0	0	0	0	0	0	0	0	0
OTU599	d__Bacteria;p__Proteobacteria;c__Alphaproteobacteria;o__SAR11_clade;f__uncultured;g__uncultured;s__uncultured_Candidatus	0	0	0	0	0.00858701	0	0	0	0	0	0	0	0	0	0	0	0	0	0	0	0	0	0	0	0	0	0	0	0	0	0
OTU600	d__Bacteria;p__Proteobacteria;c__Alphaproteobacteria;o__Sneathiellales;f__Sneathiellaceae;g__Sneathiella;__	0	0	0	0	0	0	0	0	0	0	0	0	0	0	0.011616	0	0	0	0	0	0	0	0	0	0	0	0	0	0	0	0
OTU601	d__Bacteria;p__Proteobacteria;c__Alphaproteobacteria;o__Sneathiellales;f__Sneathiellaceae;g__Sneathiella;s__uncultured_bacterium	0	0	0	0	0	0	0	0	0	0	0	0	0.0145663	0.0183551	0	0.113572	0	0	0.0227238	0	0	0	0	0	0	0	0	0.059876	0	0	0.0160218
OTU602	d__Bacteria;p__Proteobacteria;c__Alphaproteobacteria;o__Sphingomonadales;f__Sphingomonadaceae;__;__	0.0197061	0	0.00356799	0	0.017174	0.0115323	0	0	0	0	0.0626903	0.0100371	0.050982	0.0433847	0.0542079	0.244889	0.0233699	0.0109601	0.0151492	0	0	0	0.307338	0	0	0	0	0	0.101121	0.020002	0.672915
OTU603	d__Bacteria;p__Proteobacteria;c__Alphaproteobacteria;o__Sphingomonadales;f__Sphingomonadaceae;g__Altererythrobacter;__	0	0	0	0	0	0	0	0	0	0	0	0	0	0	0	0.16326	0	0	0	0	0	0	0	0	0	0	0	0	0	0	0.0480654
OTU604	d__Bacteria;p__Proteobacteria;c__Alphaproteobacteria;o__Sphingomonadales;f__Sphingomonadaceae;g__Altererythrobacter;s__Altererythrobacter_namhicola	0	0	0	0	0	0	0	0	0	0	0.00895576	0	0	0.0116805	0	0	0	0	0	0	0	0	0	0	0	0	0	0	0	0	0
OTU605	d__Bacteria;p__Proteobacteria;c__Alphaproteobacteria;o__Sphingomonadales;f__Sphingomonadaceae;g__Blastomonas;__	0	0	0	0	0	0	0	0	0	0	0	0	0	0	0	0	0	0	0	0.050844	0	0	0	0	0	0	0	0	0	0	0
OTU606	d__Bacteria;p__Proteobacteria;c__Alphaproteobacteria;o__Sphingomonadales;f__Sphingomonadaceae;g__Novosphingobium;__	0	0	0	0	0	0	0	0	0	0	0	0	0	0	0	0	0	0	0	0	0	0	0.115252	0	0	0	0	0	0	0	0
OTU607	d__Bacteria;p__Proteobacteria;c__Alphaproteobacteria;o__Sphingomonadales;f__Sphingomonadaceae;g__Parasphingopyxis;s__uncultured_bacterium	0	0	0	0	0	0	0	0	0	0	0	0	0	0.0133491	0	0.0248438	0	0	0.0189365	0	0	0	0	0	0	0	0	0	0	0	0.0200272
OTU608	d__Bacteria;p__Proteobacteria;c__Alphaproteobacteria;o__Sphingomonadales;f__Sphingomonadaceae;g__Sphingomonas;__	0	0	0	0	0	0	0	0	0	0	0	0	0	0	0	0	0	0	0	0.650803	0	0	0	0	0	0	0	0	0	0	0
OTU609	d__Bacteria;p__Proteobacteria;c__Alphaproteobacteria;o__Sphingomonadales;f__Sphingomonadaceae;g__Sphingorhabdus;__	0.0563031	0	0	0	0	0	0.0334541	0.00651474	0	0	0	0.0301114	0	0.0150178	0.0522719	0.621096	0	0	0	0	0	0	0	0	0	0	0	0	0.0379203	0	0.212289
OTU610	d__Bacteria;p__Proteobacteria;c__Alphaproteobacteria;o__Thalassobaculales;f__Nisaeaceae;g__OM75_clade;__	0.00422274	0	0	0	0	0	0	0	0	0	0	0	0	0	0	0	0	0	0	0	0	0	0	0	0	0	0	0	0	0	0
OTU611	d__Bacteria;p__Proteobacteria;c__Alphaproteobacteria;o__Thalassobaculales;f__Nisaeaceae;g__OM75_clade;s__uncultured_Alphaproteobacteria	0	0	0	0	0	0	0	0	0	0	0	0	0	0	0	0	0	0	0	0.0305064	0	0	0	0	0	0	0	0	0	0	0
OTU612	d__Bacteria;p__Proteobacteria;c__Alphaproteobacteria;o__Thalassobaculales;f__uncultured;g__uncultured;__	0	0	0	0	0	0	0	0	0	0	0	0	0	0.0100118	0	0	0	0	0	0	0	0	0	0	0	0	0	0	0	0	0
OTU613	d__Bacteria;p__Proteobacteria;c__Alphaproteobacteria;o__Thalassobaculales;f__uncultured;g__uncultured;s__alpha_proteobacterium	0	0	0	0	0	0	0	0	0	0	0	0	0	0	0	0.28393	0	0	0	0	0	0	0	0	0	0	0	0	0	0	0
OTU614	d__Bacteria;p__Proteobacteria;c__Alphaproteobacteria;o__Tistrellales;f__Geminicoccaceae;g__uncultured;s__uncultured_Alphaproteobacteria	0	0	0	0	0	0	0	0	0	0	0	0	0	0	0	0.0177456	0	0	0	0	0	0	0	0	0	0	0	0	0	0	0
OTU615	d__Bacteria;p__Proteobacteria;c__Alphaproteobacteria;o__uncultured;f__uncultured;g__uncultured;s__uncultured_Alphaproteobacteria	0	0	0	0	0	0	0	0	0	0	0	0.0345724	0	0.0250296	0.00774398	0.259086	0	0	0.0757461	0	0	0	0	0	0	0.0226809	0	0	0	0	0.0440599
OTU616	d__Bacteria;p__Proteobacteria;c__Alphaproteobacteria;o__uncultured;f__uncultured;g__uncultured;s__uncultured_marine	0	0	0	0	0	0	0	0	0	0	0	0	0	0	0.00387199	0	0	0	0	0	0	0	0	0	0	0	0	0	0	0	0
OTU617	d__Bacteria;p__Proteobacteria;c__Gammaproteobacteria;__;__;__;__	0.090085	0.00269745	0.012488	0.101601	0.58821	0.157607	0.0947867	0.0273619	0.00484418	1.17052	3.47931	0.188475	0.801146	0.297018	0.187792	1.64679	0.0895848	0.224682	0.496137	0.244051	0.0268492	0	0.537841	0.697599	0.13306	0.0340213	0	0.158495	0.46347	0.125013	0.268365
OTU618	d__Bacteria;p__Proteobacteria;c__Gammaproteobacteria;o__AT-s2-59;f__AT-s2-59;g__AT-s2-59;__	0	0	0	0	0	0	0	0	0	0	0	0	0	0.0400474	0	0.0496877	0	0	0.0227238	0	0	0	0	0	0	0	0	0	0	0	0
OTU619	d__Bacteria;p__Proteobacteria;c__Gammaproteobacteria;o__Alteromonadales;f__Alteromonadaceae;__;__	0	0	0	0	0	0	0	0	0	0	0.00447788	0.0368028	0	0.00333728	0	0.0141965	0	0	0	0	0	0	0	0	0	0	0	0	0	0.010001	0
OTU620	d__Bacteria;p__Proteobacteria;c__Gammaproteobacteria;o__Alteromonadales;f__Alteromonadaceae;g__Alteromonas;__	0	0	0	0	0	0	0	0	0	0	0.0582124	0	0	0.0266983	0	0	0	0	0	0	0	0	0	0	0	0	0	0	0	0	0
OTU621	d__Bacteria;p__Proteobacteria;c__Gammaproteobacteria;o__Alteromonadales;f__Alteromonadaceae;g__Glaciecola;s__Glaciecola_nitratireducens	0	0	0	0	0	0	0	0	0	0	0	0	0.00485543	0	0	0	0	0	0	0	0	0	0	0	0	0	0	0	0	0	0
OTU622	d__Bacteria;p__Proteobacteria;c__Gammaproteobacteria;o__Alteromonadales;f__Alteromonadaceae;g__Paraglaciecola;__	0.0211137	0.102503	0	0.0414697	0.0558156	0.149919	0.0501812	0.0104236	0.0113031	0.0255571	0.123142	0.0914495	0.050982	0.088438	0.1452	0.106474	0	0.0712407	0.0340857	0	0	0	0.153669	0	0	0	0	0	0.235948	0	0.0520708
OTU623	d__Bacteria;p__Proteobacteria;c__Gammaproteobacteria;o__Alteromonadales;f__Colwelliaceae;g__Colwellia;__	0.00985305	0.0647389	0	0.0248818	0.0386415	0.161452	0.239755	0.00521179	0	0.148231	0.0447788	0.0758361	0.235488	0.151846	0.0813118	0.369108	0.019475	0.0548005	0.496137	0.488103	0.402739	0	0	0	0	0	0.0410523	0.0211327	0.147468	0.105011	0.104142
OTU624	d__Bacteria;p__Proteobacteria;c__Gammaproteobacteria;o__Alteromonadales;f__Colwelliaceae;g__Colwellia;s__Thalassomonas_sediminis	0.00703789	0	0	0	0	0	0.0836353	0	0	0	0	0.00669142	0	0	0.01936	0	0	0	0.0757461	0	0	0	0	0	0	0	0	0	0	0	0
OTU625	d__Bacteria;p__Proteobacteria;c__Gammaproteobacteria;o__Alteromonadales;f__Marinobacteraceae;g__Marinobacter;__	0	0	0	0	0	0	0	0	0	0	0.0111947	0	0	0	0	0	0	0	0	0	0	0	0	0	0	0	0	0	0	0	0
OTU626	d__Bacteria;p__Proteobacteria;c__Gammaproteobacteria;o__Alteromonadales;f__Moritellaceae;g__Moritella;__	0	0	0	0	0	0	0.0167271	0	0	0	0	0	0	0.0133491	0.00387199	0	0	0	0.037873	0	0	0	0	0	0	0	0	0	0	0.0150015	0
OTU627	d__Bacteria;p__Proteobacteria;c__Gammaproteobacteria;o__Alteromonadales;f__Pseudoalteromonadaceae;g__Pseudoalteromonas;__	0	0	0	0	0	0	0	0	0	0	0	0	0	0	0	0	0	0	0	0	0	0	0.422589	0	0.0887065	0	0	0.0316991	0.408696	0	0.0520708
OTU628	d__Bacteria;p__Proteobacteria;c__Gammaproteobacteria;o__Alteromonadales;f__Pseudoalteromonadaceae;g__Psychrosphaera;s__Psychrosphaera_saromensis	0	0	0	0	0	0	0	0	0	0	0	0	0	0	0	0	0	0	0	0	0	0	0	0	0	0	0	0	0.0126401	0	0
OTU629	d__Bacteria;p__Proteobacteria;c__Gammaproteobacteria;o__Alteromonadales;f__Pseudoalteromonadaceae;g__uncultured;__	0	0	0	0	0	0	0	0	0	0	0	0	0	0	0	0	0	0	0.0227238	0	0	0	0	0	0	0	0	0	0	0	0
OTU630	d__Bacteria;p__Proteobacteria;c__Gammaproteobacteria;o__Alteromonadales;f__Pseudoalteromonadaceae;g__uncultured;s__uncultured_bacterium	0	0	0	0	0	0	0	0	0	0	0	0	0	0	0	0	0	0	0	0	0	0	0	0	0	0	0	0	0.0337069	0	0
OTU631	d__Bacteria;p__Proteobacteria;c__Gammaproteobacteria;o__Alteromonadales;f__Psychromonadaceae;g__Psychromonas;__	0.00563031	0.0377644	0	0	0.0386415	0.0230645	0.144968	0.0143324	0.00645891	0	0.0223894	0.100371	0.0898254	0.0584024	0.015488	0.0390403	0	0	0.0530223	0.345739	0.604108	0	0.153669	0	0	0	0	0.0176106	0.0800539	0	0
OTU632	d__Bacteria;p__Proteobacteria;c__Gammaproteobacteria;o__Alteromonadales;f__Shewanellaceae;g__Psychrobium;__	0	0	0	0	0	0	0	0	0	0	0	0	0	0.0116805	0	0	0	0	0	0	0	0	0	0	0	0	0	0	0	0	0
OTU633	d__Bacteria;p__Proteobacteria;c__Gammaproteobacteria;o__Alteromonadales;f__Shewanellaceae;g__Shewanella;__	0	0.0485542	0.00535198	0.0207348	0.00858701	0.123011	0	0	0	0.0664486	0.0134336	0.0591076	0.0776869	0.00500592	0.0503359	0	0.01558	0.0849408	0.227238	0.0203376	0.201369	0	0	0	0	0	0.00684205	0	0.0337069	0.020002	0.0280381
OTU634	d__Bacteria;p__Proteobacteria;c__Gammaproteobacteria;o__Alteromonadales;f__Shewanellaceae;g__Shewanella;s__Shewanella_hanedai	0.105568	0	0	0	0	0	0	0	0	0	0	0	0	0	0	0	0	0	0	0	0	0	0	0	0	0	0	0	0	0	0
OTU635	d__Bacteria;p__Proteobacteria;c__Gammaproteobacteria;o__Arenicellales;f__Arenicellaceae;__;__	0	0	0	0	0	0	0	0	0	0	0	0	0	0	0	0.00709824	0	0	0	0	0	0	0	0	0	0	0	0	0	0	0
OTU636	d__Bacteria;p__Proteobacteria;c__Gammaproteobacteria;o__Arenicellales;f__Arenicellaceae;g__Arenicella;__	0.0464501	0.0134873	0.00891997	0	0	0	0	0	0	0	0.0134336	0.0579923	0.0631206	0.0750889	0.0871198	1.04699	0	0.0109601	0	0	0	0	0	0	0	0	0	0.176106	0.0421336	0.0350035	0
OTU637	d__Bacteria;p__Proteobacteria;c__Gammaproteobacteria;o__Arenicellales;f__Arenicellaceae;g__Arenicella;s__uncultured_bacterium	0	0	0	0	0	0	0.0446055	0.00912064	0	0	0	0.0501857	0	0	0.0445279	0.0638842	0	0	0	0	0	0	0	0	0	0	0	0	0.0589871	0	0.0600817
OTU638	d__Bacteria;p__Proteobacteria;c__Gammaproteobacteria;o__Arenicellales;f__Arenicellaceae;g__HTCC5015;s__uncultured_bacterium	0	0	0	0	0	0	0	0	0	0	0.00671682	0	0	0	0	0	0	0	0	0	0	0	0	0	0	0	0	0	0	0	0
OTU639	d__Bacteria;p__Proteobacteria;c__Gammaproteobacteria;o__Arenicellales;f__Arenicellaceae;g__HTCC5015;s__uncultured_gamma	0	0	0	0	0.034348	0	0	0.00651474	0	0	0	0.0156133	0.0121386	0.0550652	0.015488	0.0141965	0	0	0	0	0	0	0	0	0	0	0	0	0.0252802	0	0
OTU640	d__Bacteria;p__Proteobacteria;c__Gammaproteobacteria;o__Arenicellales;f__Arenicellaceae;g__Perspicuibacter;__	0	0	0	0	0	0	0	0	0	0	0	0.00334571	0	0	0	0	0	0	0	0	0	0	0	0	0	0	0	0	0	0	0
OTU641	d__Bacteria;p__Proteobacteria;c__Gammaproteobacteria;o__Arenicellales;f__Arenicellaceae;g__Perspicuibacter;s__uncultured_bacterium	0	0	0	0	0	0	0	0	0	0	0	0	0	0	0	0.28038	0	0	0	0	0	0	0	0	0	0	0	0	0	0	0
OTU642	d__Bacteria;p__Proteobacteria;c__Gammaproteobacteria;o__Arenicellales;f__Arenicellaceae;g__uncultured;__	0	0	0	0	0	0	0	0	0	0	0	0	0	0	0.00967998	0	0	0	0	0	0	0	0	0	0	0	0	0	0	0	0
OTU643	d__Bacteria;p__Proteobacteria;c__Gammaproteobacteria;o__Arenicellales;f__Arenicellaceae;g__uncultured;s__uncultured_marine	0	0	0	0	0	0	0	0	0	0	0	0	0	0	0	0.0319421	0	0	0	0	0	0	0	0	0	0	0	0	0	0	0
OTU644	d__Bacteria;p__Proteobacteria;c__Gammaproteobacteria;o__B2M28;f__B2M28;g__B2M28;__	0	0	0	0	0	0	0	0	0	0	0	0	0	0	0	0.0212947	0	0	0	0	0	0	0.345755	0	0	0	0	0	0	0	0
OTU645	d__Bacteria;p__Proteobacteria;c__Gammaproteobacteria;o__BD7-8;f__BD7-8;g__BD7-8;__	0.0281516	0	0	0	0.051522	0	0	0	0	0	0.0335841	0.0245352	0.0898254	0.165195	0.187792	0.259086	0.136325	0	0.178003	0	0	0	0.153669	0	0	0	0	0	0	0	0.0881198
OTU646	d__Bacteria;p__Proteobacteria;c__Gammaproteobacteria;o__BD72BR169;f__BD72BR169;g__BD72BR169;s__uncultured_Vibrio	0	0	0	0	0	0	0	0	0	0	0	0	0	0	0	0	0	0	0	0	0.0671231	0	0	0	0	0	0	0	0	0	0
OTU647	d__Bacteria;p__Proteobacteria;c__Gammaproteobacteria;o__Burkholderiales;__;__;__	0	0	0	0	0	0	0	0.0117265	0	0	0	0	0	0.00667456	0	0	0	0	0.0227238	0	0	0	0	0	0	0	0	0	0	0	0
OTU648	d__Bacteria;p__Proteobacteria;c__Gammaproteobacteria;o__Burkholderiales;f__Comamonadaceae;__;__	0	0	0	0	0	0	0	0	0	0	0	0	0	0	0	0	0	0	0	0.0915192	0	0	0	0	0	0	0	0	0	0	0
OTU649	d__Bacteria;p__Proteobacteria;c__Gammaproteobacteria;o__Burkholderiales;f__Comamonadaceae;g__Polaromonas;__	0	0	0	0.00829394	0	0	0	0	0	0	0	0	0	0	0	0	0	0	0	0	0	0	0	0	0	0	0	0	0	0	0
OTU650	d__Bacteria;p__Proteobacteria;c__Gammaproteobacteria;o__Burkholderiales;f__EC94;g__EC94;__	0	0	0	0	0	0	0	0	0	0	2.21879	0	0	0	0	0	0	0	0	0	0	0	0.230503	0	0	0	0	0	0	0	0
OTU651	d__Bacteria;p__Proteobacteria;c__Gammaproteobacteria;o__Burkholderiales;f__EC94;g__EC94;s__uncultured_bacterium	87.1418	86.7663	97.1313	1.71062	32.9698	56.4158	65.1185	92.8494	93.2892	0.173789	1.33665	89.374	15.6466	56.0163	55.2436	0.028393	89.9276	88.3056	86.3922	54.9014	81.3398	93.1453	53.8993	73.9617	75.7942	88.8977	93.955	83.8722	92.9679	68.4118	84.2185
OTU652	d__Bacteria;p__Proteobacteria;c__Gammaproteobacteria;o__Burkholderiales;f__EC94;g__EC94;s__uncultured_marine	0	0	0	85.5685	0	0	0	0	0	0	0	0	0	0	0	0	0	0	0	0	0	0.169252	0	0	0	0	0	0	0	0	0
OTU653	d__Bacteria;p__Proteobacteria;c__Gammaproteobacteria;o__Burkholderiales;f__EC94;g__EC94;s__uncultured_proteobacterium	0	0	0	0	0	0	0	0	0	0.0460029	60.4267	0	0	0.00834321	0	0	0	0	0	0.152532	0	0	2.57395	0	0	0	0	0	0	0	0
OTU654	d__Bacteria;p__Proteobacteria;c__Gammaproteobacteria;o__Burkholderiales;f__Methylophilaceae;g__Methylotenera;__	0.053488	0	0	0.0248818	0	0	0.200725	0	0	0.21468	0.0268673	0.0769514	0.0655483	0.103456	0.0832478	0.834043	0.0740048	0	0.132556	0	0	0	0	0	0	0	0	0	0.130614	0.080008	0.204278
OTU655	d__Bacteria;p__Proteobacteria;c__Gammaproteobacteria;o__Burkholderiales;f__Methylophilaceae;g__OM43_clade;__	0	0.0404618	0.0463838	0.0746454	0	0.119167	0.0947867	0	0.0193767	0.0562257	0.0626903	0.00780666	0.0194217	0.0250296	0.0464639	0	0.0311599	0.0356203	0	0.366077	0.17452	0	0	0.0811162	0.116427	0	0.0239472	0.0528318	0	0.325033	0
OTU656	d__Bacteria;p__Proteobacteria;c__Gammaproteobacteria;o__Burkholderiales;f__Neisseriaceae;g__Neisseria;s__Neisseria_perflava	0	0	0	0	0	0	0	0	0	0	0.00447788	0	0	0	0	0	0	0	0	0	0	0	0	0	0	0	0	0	0	0	0
OTU657	d__Bacteria;p__Proteobacteria;c__Gammaproteobacteria;o__Burkholderiales;f__Nitrosomonadaceae;__;__	0	0	0	0	0	0	0	0	0	0	0.00447788	0	0	0	0	0	0	0	0	0	0	0	0	0	0	0	0	0	0	0	0
OTU658	d__Bacteria;p__Proteobacteria;c__Gammaproteobacteria;o__Burkholderiales;f__Nitrosomonadaceae;g__IS-44;s__uncultured_deep-sea	0	0	0	0	0.00858701	0	0	0	0	0	0	0	0.00971086	0.00667456	0	0.0496877	0	0	0	0	0	0	0	0	0	0	0	0	0	0	0
OTU659	d__Bacteria;p__Proteobacteria;c__Gammaproteobacteria;o__Burkholderiales;f__Nitrosomonadaceae;g__MND1;__	0	0	0	0	0	0	0	0	0	0	0	0	0	0	0	0	0	0	0	0	0	0	0.115252	0	0	0	0	0	0	0	0
OTU660	d__Bacteria;p__Proteobacteria;c__Gammaproteobacteria;o__Burkholderiales;f__Nitrosomonadaceae;g__Nitrosomonas;__	0	0	0	0.0124409	0	0.0153763	0	0	0	0	0	0.0100371	0.0291326	0.0250296	0.01936	0	0.0350549	0	0.0946826	0	0	0	0	0	0.0221766	0	0	0.0528318	0	0	0.0400545
OTU661	d__Bacteria;p__Proteobacteria;c__Gammaproteobacteria;o__Burkholderiales;f__Nitrosomonadaceae;g__Nitrosomonas;s__uncultured_Nitrosospira	0.026744	0	0.00535198	0	0	0	0	0	0	0.0153343	0	0.0122676	0.016994	0.0450533	0.0290399	0.36201	0	0	0.0719588	0	0	0	0	0	0	0	0	0	0	0	0.0280381
OTU662	d__Bacteria;p__Proteobacteria;c__Gammaproteobacteria;o__Burkholderiales;f__Oxalobacteraceae;g__Massilia;__	0	0	0	0	0	0	0	0	0	0	0	0	0	0	0	0	0	0	0	0	0	0	0.192086	0	0	0	0	0	0	0	0
OTU663	d__Bacteria;p__Proteobacteria;c__Gammaproteobacteria;o__Cardiobacteriales;f__Cardiobacteriaceae;g__uncultured;__	0	0	0	0.00622045	0	0	0	0.00521179	0	0	0	0.0144981	0.016994	0	0	0	0	0	0	0	0	0	0	0	0	0	0	0	0	0	0
OTU664	d__Bacteria;p__Proteobacteria;c__Gammaproteobacteria;o__Cellvibrionales;__;__;__	0	0	0	0	0	0	0	0	0	0	0	0	0	0	0.00387199	0	0	0	0	0	0	0	0	0	0	0	0	0	0	0	0
OTU665	d__Bacteria;p__Proteobacteria;c__Gammaproteobacteria;o__Cellvibrionales;f__Cellvibrionaceae;__;__	0	0	0	0	0	0	0	0	0	0	0.0111947	0	0	0	0	0	0	0	0.0302984	0	0	0	0	0	0	0	0	0	0	0	0
OTU666	d__Bacteria;p__Proteobacteria;c__Gammaproteobacteria;o__Cellvibrionales;f__Cellvibrionaceae;g__Candidatus_Endobugula;__	0	0	0	0	0	0	0	0	0	0	0	0	0	0	0	0.0461386	0	0	0	0	0	0	0	0	0	0	0	0	0	0	0
OTU667	d__Bacteria;p__Proteobacteria;c__Gammaproteobacteria;o__Cellvibrionales;f__Cellvibrionaceae;g__Candidatus_Endobugula;s__uncultured_gamma	0	0	0	0	0	0	0	0	0	0	0	0	0	0	0	0	0	0	0	0	0	0	0	0	0	0	0	0	0.0168535	0	0
OTU668	d__Bacteria;p__Proteobacteria;c__Gammaproteobacteria;o__Cellvibrionales;f__Cellvibrionaceae;g__Candidatus_Endobugula;s__uncultured_marine	0.00422274	0	0	0	0	0	0	0	0	0	0	0	0	0	0	0	0	0	0	0	0	0	0	0	0	0	0	0	0	0	0
OTU669	d__Bacteria;p__Proteobacteria;c__Gammaproteobacteria;o__Cellvibrionales;f__Cellvibrionaceae;g__uncultured;__	0	0	0	0	0	0	0	0	0	0	0	0	0	0	0	0.0177456	0	0	0	0	0	0	0	0	0	0	0	0.00704424	0	0	0
OTU670	d__Bacteria;p__Proteobacteria;c__Gammaproteobacteria;o__Cellvibrionales;f__Cellvibrionaceae;g__uncultured;s__marine_metagenome	0	0	0	0	0	0	0	0	0	0	0.0246283	0	0	0	0	0	0	0	0	0	0	0	0	0	0	0	0	0	0	0	0
OTU671	d__Bacteria;p__Proteobacteria;c__Gammaproteobacteria;o__Cellvibrionales;f__Cellvibrionaceae;g__uncultured;s__uncultured_bacterium	0.00422274	0	0	0	0	0	0	0	0	0	0	0	0.016994	0.0717516	0	0.0745315	0	0	0	0.0305064	0	0	0	0	0	0	0	0	0	0.040004	0
OTU672	d__Bacteria;p__Proteobacteria;c__Gammaproteobacteria;o__Cellvibrionales;f__Cellvibrionaceae;g__uncultured;s__uncultured_organism	0	0	0	0	0	0	0.072484	0	0	0	0	0	0	0	0	0	0	0	0	0	0	0	0	0	0	0	0	0	0.0252802	0	0
OTU673	d__Bacteria;p__Proteobacteria;c__Gammaproteobacteria;o__Cellvibrionales;f__Halieaceae;__;__	0	0	0.0160559	0.0767189	0.0601091	0.0384408	0.0669083	0.0104236	0	0.0613371	0.0313452	0	0.0388434	0.111799	0	0.191652	0.0584249	0.0219202	0.0189365	0.122026	0.120822	0	0	0	0	0	0.0171051	0	0	0.130013	0
OTU674	d__Bacteria;p__Proteobacteria;c__Gammaproteobacteria;o__Cellvibrionales;f__Halieaceae;g__Halioglobus;__	0.0253364	0	0	0	0	0	0	0	0	0	0.0246283	0.0323419	0.0752592	0.373776	0.100672	1.11087	0.0740048	0	0.132556	0	0	0	0	0	0.0277208	0	0	0	0.0632005	0	0.0640872
OTU675	d__Bacteria;p__Proteobacteria;c__Gammaproteobacteria;o__Cellvibrionales;f__Halieaceae;g__Marimicrobium;__	0	0	0	0	0	0	0	0	0	0	0	0	0	0	0	0.0141965	0	0	0	0	0	0	0	0	0	0	0	0	0	0	0
OTU676	d__Bacteria;p__Proteobacteria;c__Gammaproteobacteria;o__Cellvibrionales;f__Halieaceae;g__Marimicrobium;s__uncultured_bacterium	0	0	0	0	0	0	0	0	0	0	0	0	0	0	0	0	0	0	0	0	0	0	0	0	0	0.0453618	0	0	0	0	0
OTU677	d__Bacteria;p__Proteobacteria;c__Gammaproteobacteria;o__Cellvibrionales;f__Halieaceae;g__OM60(NOR5)_clade;__	0	0	0	0	0	0	0	0	0	0	0	0	0	0	0	0.145514	0	0	0	0	0	0	0	0	0	0	0	0	0.0252802	0	0
OTU678	d__Bacteria;p__Proteobacteria;c__Gammaproteobacteria;o__Cellvibrionales;f__Microbulbiferaceae;g__Microbulbifer;__	0	0	0	0	0	0	0	0	0	0	0	0	0	0.00667456	0	0	0	0	0	0	0	0	0	0	0	0	0	0	0	0	0
OTU679	d__Bacteria;p__Proteobacteria;c__Gammaproteobacteria;o__Cellvibrionales;f__Porticoccaceae;g__SAR92_clade;__	0	0.0701338	0.0410319	0.0704985	0.0386415	0.342123	0.200725	0.00651474	0	0.0664486	0.0694071	0.0167286	0.016994	0.023361	0.152944	0	0.0467399	0.0602806	0	0.528778	0.268492	0	0	0.146009	0	0.0340213	0.0376313	0	0	0.480048	0
OTU680	d__Bacteria;p__Proteobacteria;c__Gammaproteobacteria;o__Cellvibrionales;f__Spongiibacteraceae;__;__	0	0	0	0	0	0	0.0780597	0	0	0	0	0	0.0194217	0	0	0	0	0	0	0	0	0	0	0	0	0	0	0	0	0	0
OTU681	d__Bacteria;p__Proteobacteria;c__Gammaproteobacteria;o__Cellvibrionales;f__Spongiibacteraceae;g__BD1-7_clade;__	0	0	0	0	0	0	0	0	0	0	0	0	0	0.0333728	0	0	0	0	0	0	0	0	0	0	0	0	0	0	0.0252802	0	0
OTU682	d__Bacteria;p__Proteobacteria;c__Gammaproteobacteria;o__Cellvibrionales;f__Spongiibacteraceae;g__BD1-7_clade;s__uncultured_deep-sea	0	0	0	0	0	0	0	0	0	0	0	0	0	0.00834321	0	0	0	0	0	0	0	0	0	0	0	0	0	0	0	0	0
OTU683	d__Bacteria;p__Proteobacteria;c__Gammaproteobacteria;o__Cellvibrionales;f__Spongiibacteraceae;g__BD1-7_clade;s__uncultured_gamma	0	0	0	0	0	0	0	0	0	0	0	0	0	0	0.017424	0.028393	0	0	0	0	0	0	0	0	0	0	0	0	0	0	0
OTU684	d__Bacteria;p__Proteobacteria;c__Gammaproteobacteria;o__Cellvibrionales;f__Spongiibacteraceae;g__BD1-7_clade;s__uncultured_marine	0	0	0	0	0	0.0307527	0	0	0	0	0.00447788	0	0	0	0	0	0	0	0.0189365	0	0	0	0	0	0	0	0	0	0	0	0
OTU685	d__Bacteria;p__Proteobacteria;c__Gammaproteobacteria;o__Cellvibrionales;f__Spongiibacteraceae;g__Dasania;s__Dasania_marina	0	0	0	0	0	0	0	0	0	0	0.0111947	0.0156133	0	0	0	0	0.019475	0	0	0	0	0	0	0	0	0	0	0	0	0	0
OTU686	d__Bacteria;p__Proteobacteria;c__Gammaproteobacteria;o__Cellvibrionales;f__Spongiibacteraceae;g__Dasania;s__uncultured_bacterium	0	0	0	0	0	0	0	0	0	0	0	0	0	0.00834321	0	0	0	0	0	0	0	0	0	0	0	0	0	0	0	0	0
OTU687	d__Bacteria;p__Proteobacteria;c__Gammaproteobacteria;o__Cellvibrionales;f__Spongiibacteraceae;g__Sinobacterium;s__uncultured_bacterium	0	0	0	0	0	0	0	0	0	0	0	0	0	0.0166864	0.00967998	0.0532368	0	0	0	0	0	0	0	0	0	0	0	0	0	0	0
OTU688	d__Bacteria;p__Proteobacteria;c__Gammaproteobacteria;o__Cellvibrionales;f__Spongiibacteraceae;g__uncultured;__	0	0	0	0	0.0214675	0	0	0	0	0	0	0.0133828	0	0.0517279	0	0.0390403	0	0	0	0	0	0	0	0	0	0	0	0	0	0	0
OTU689	d__Bacteria;p__Proteobacteria;c__Gammaproteobacteria;o__Chromatiales;f__Sedimenticolaceae;__;__	0	0	0	0	0	0	0	0	0	0	0	0	0	0	0	0	0	0	0	1.53549	0	0	0	0	0	0	0	0	0	0	0
OTU690	d__Bacteria;p__Proteobacteria;c__Gammaproteobacteria;o__Chromatiales;f__Sedimenticolaceae;g__Candidatus_Thiodiazotropha;__	0	0	0	0	0	0	0	0	0	0	0	0	0	0	0	0	0	0	0	0.0305064	0	0	0	0	0	0	0	0	0	0	0
OTU691	d__Bacteria;p__Proteobacteria;c__Gammaproteobacteria;o__Chromatiales;f__Sedimenticolaceae;g__Sedimenticola;s__uncultured_gamma	0	0	0	0	0	0	0	0.0026059	0	0	0	0	0	0	0	0	0	0	0	0	0	0	0	0	0	0	0	0	0	0	0
OTU692	d__Bacteria;p__Proteobacteria;c__Gammaproteobacteria;o__Coxiellales;f__Coxiellaceae;g__Coxiella;__	0	0	0	0	0	0	0	0	0	0	0	0	0.00728314	0	0.00967998	0.0958262	0	0	0	0	0	0	0	0	0	0	0	0	0	0	0
OTU693	d__Bacteria;p__Proteobacteria;c__Gammaproteobacteria;o__EPR3968-O8a-Bc78;f__EPR3968-O8a-Bc78;g__EPR3968-O8a-Bc78;__	0	0	0	0	0	0	0	0	0	0	0	0	0	0	0	0	0	0	0	0	0	0	0.153669	0	0	0	0	0	0	0	0
OTU694	d__Bacteria;p__Proteobacteria;c__Gammaproteobacteria;o__EV818SWSAP88;f__EV818SWSAP88;g__EV818SWSAP88;__	0	0	0	0	0	0	0	0	0	0	0	0	0	0	0	0.0106474	0	0	0	0	0	0	0	0	0	0	0	0	0	0	0
OTU695	d__Bacteria;p__Proteobacteria;c__Gammaproteobacteria;o__Ectothiorhodospirales;f__Ectothiorhodospiraceae;g__Thiogranum;s__uncultured_gamma	0	0	0	0	0	0	0	0	0	0	0	0	0	0	0	0	0	0	0	0	0	0	0.0384172	0	0	0	0	0	0	0	0
OTU696	d__Bacteria;p__Proteobacteria;c__Gammaproteobacteria;o__Ectothiorhodospirales;f__Ectothiorhodospiraceae;g__uncultured;s__uncultured_proteobacterium	0	0	0	0	0	0	0	0	0	0	0	0	0	0	0	0	0	0	0	0	0	0	0	0	0	0	0	0	0	0.0250025	0
OTU697	d__Bacteria;p__Proteobacteria;c__Gammaproteobacteria;o__Enterobacterales;f__Yersiniaceae;__;__	0	0	0	0	0	0	0	0	0	0	0	0	0	0	0	0	0	0	0	0	0	0	0	0	0	0	0	0	0	0.040004	0
OTU698	d__Bacteria;p__Proteobacteria;c__Gammaproteobacteria;o__F9P41300-M23;f__F9P41300-M23;g__F9P41300-M23;s__uncultured_bacterium	0	0	0	0	0	0.0192204	0	0	0	0.0102229	0	0	0.00728314	0	0	0	0	0	0	0	0	0	0	0	0	0	0.0102631	0	0	0	0
OTU699	d__Bacteria;p__Proteobacteria;c__Gammaproteobacteria;o__Francisellales;f__Francisellaceae;g__Francisella;s__uncultured_bacterium	0	0	0	0	0	0	0	0	0	0	0	0	0	0	0.00967998	0.0425894	0	0	0	0	0	0	0	0	0	0	0	0	0	0	0
OTU700	d__Bacteria;p__Proteobacteria;c__Gammaproteobacteria;o__Francisellales;f__Francisellaceae;g__uncultured;__	0	0	0	0	0	0	0	0	0	0	0	0	0	0	0.191664	0	0	0	0	0	0	0	0	0	0	0	0	0	0	0	0
OTU701	d__Bacteria;p__Proteobacteria;c__Gammaproteobacteria;o__Ga0077536;f__Ga0077536;g__Ga0077536;s__uncultured_bacterium	0	0	0	0	0	0	0	0	0	0	0	0	0	0	0	0.0177456	0	0	0	0	0	0	0	0	0	0	0	0	0	0	0
OTU702	d__Bacteria;p__Proteobacteria;c__Gammaproteobacteria;o__Ga0077536;f__Ga0077536;g__Ga0077536;s__uncultured_gamma	0	0	0	0	0	0	0	0	0	0	0	0	0	0	0	0.0141965	0.00778998	0	0	0	0	0	0	0	0	0	0	0	0	0	0
OTU703	d__Bacteria;p__Proteobacteria;c__Gammaproteobacteria;o__Ga0077536;f__Ga0077536;g__Ga0077536;s__uncultured_marine	0	0	0	0	0	0	0	0	0	0	0	0	0	0	0	0.0177456	0	0	0	0	0	0	0	0	0	0	0	0	0	0	0
OTU704	d__Bacteria;p__Proteobacteria;c__Gammaproteobacteria;o__Gammaproteobacteria_Incertae_Sedis;f__Unknown_Family;g__Marinicella;__	0.0323743	0	0	0	0	0	0	0	0	0.0255571	0	0.0278809	0	0.115136	0.0329119	0.649489	0	0.0191802	0.0643842	0	0	0	0	0	0	0	0	0	0.0252802	0.020002	0.0921253
OTU705	d__Bacteria;p__Proteobacteria;c__Gammaproteobacteria;o__Gammaproteobacteria_Incertae_Sedis;f__Unknown_Family;g__Marinicella;s__uncultured_Marinicella	0	0	0	0	0	0	0	0	0	0	0	0	0	0	0	0.0390403	0	0	0	0	0	0	0	0	0	0	0	0	0	0	0
OTU706	d__Bacteria;p__Proteobacteria;c__Gammaproteobacteria;o__Gammaproteobacteria_Incertae_Sedis;f__Unknown_Family;g__Marinicella;s__uncultured_gamma	0.00703789	0	0	0	0	0	0	0	0	0	0	0	0	0.0317042	0	0.149063	0	0	0	0	0	0	0	0	0	0	0	0	0	0	0
OTU707	d__Bacteria;p__Proteobacteria;c__Gammaproteobacteria;o__Gammaproteobacteria_Incertae_Sedis;f__Unknown_Family;g__Marinicella;s__uncultured_proteobacterium	0	0	0	0	0.0472285	0.0153763	0	0	0	0.0306686	0	0	0	0.0967812	0	0.716922	0	0.0219202	0	0	0	0	0	0	0	0	0	0	0.0337069	0.0250025	0
OTU708	d__Bacteria;p__Proteobacteria;c__Gammaproteobacteria;o__Gammaproteobacteria_Incertae_Sedis;f__Unknown_Family;g__Unknown_Family;s__uncultured_bacterium	0	0.00809236	0	0	0	0	0.0111514	0	0	0	0	0	0	0.00333728	0	0	0	0	0	0	0	0	0	0	0	0	0	0	0	0	0
OTU709	d__Bacteria;p__Proteobacteria;c__Gammaproteobacteria;o__Gammaproteobacteria_Incertae_Sedis;f__Unknown_Family;g__uncultured;__	0.00844547	0	0	0	0	0	0.0390298	0	0	0.0204457	0	0.0267657	0.0315603	0.0684143	0	0.436542	0	0	0.00757461	0	0	0	0.0768344	0	0	0	0	0	0.0126401	0	0.0240327
OTU710	d__Bacteria;p__Proteobacteria;c__Gammaproteobacteria;o__Gammaproteobacteria_Incertae_Sedis;f__Unknown_Family;g__uncultured;s__uncultured_marine	0	0	0	0	0	0	0	0	0	0	0	0	0	0.0200237	0.021296	0.0319421	0	0	0	0	0	0	0	0	0	0	0	0	0	0	0
OTU711	d__Bacteria;p__Proteobacteria;c__Gammaproteobacteria;o__Gammaproteobacteria_Incertae_Sedis;f__Unknown_Family;g__uncultured;s__uncultured_proteobacterium	0	0	0	0	0	0	0	0	0	0	0	0	0.00485543	0	0	0	0	0	0	0	0	0	0	0	0	0	0	0	0	0	0
OTU712	d__Bacteria;p__Proteobacteria;c__Gammaproteobacteria;o__Granulosicoccales;f__Granulosicoccaceae;g__Granulosicoccus;__	0.00844547	0	0	0	0	0	0	0	0	0.0204457	0	0.0100371	0.0388434	0.0283669	0.0696959	0.113572	0	0	0.087108	0	0	0	0	0	0	0.0226809	0	0.0105664	0.0505604	0	0.0640872
OTU713	d__Bacteria;p__Proteobacteria;c__Gammaproteobacteria;o__Granulosicoccales;f__Granulosicoccaceae;g__Granulosicoccus;s__uncultured_Granulosicoccus	0.00844547	0	0	0.0145144	0	0	0	0	0	0	0	0	0	0.0300355	0	0.0851789	0	0	0	0	0	0	0	0	0	0	0	0	0	0	0
OTU714	d__Bacteria;p__Proteobacteria;c__Gammaproteobacteria;o__Granulosicoccales;f__Granulosicoccaceae;g__Granulosicoccus;s__uncultured_bacterium	0	0	0	0	0	0.0384408	0	0	0	0	0	0	0	0	0.00774398	0.028393	0	0	0.0416604	0	0	0	0	0	0	0	0	0	0	0	0
OTU715	d__Bacteria;p__Proteobacteria;c__Gammaproteobacteria;o__Granulosicoccales;f__Granulosicoccaceae;g__Granulosicoccus;s__uncultured_gamma	0	0.0134873	0	0	0	0	0	0	0	0	0	0	0	0.00500592	0	0	0	0	0	0	0	0	0	0	0	0	0	0	0	0	0
OTU716	d__Bacteria;p__Proteobacteria;c__Gammaproteobacteria;o__Granulosicoccales;f__uncultured;g__uncultured;s__uncultured_bacterium	0	0	0	0	0	0	0	0	0	0	0	0	0	0	0	0	0	0	0	0	0	0	0.115252	0	0	0	0	0	0	0	0
OTU717	d__Bacteria;p__Proteobacteria;c__Gammaproteobacteria;o__HOC36;f__HOC36;g__HOC36;__	0	0	0	0	0	0	0	0	0	0	0	0	0	0	0	0	0	0.00548005	0	0	0	0	0	0	0	0	0	0	0	0	0
OTU718	d__Bacteria;p__Proteobacteria;c__Gammaproteobacteria;o__HOC36;f__HOC36;g__HOC36;s__uncultured_bacterium	0.00563031	0	0	0	0	0	0	0	0	0	0.00671682	0	0	0	0	0.0354912	0	0	0	0	0	0	0	0	0	0	0	0	0	0	0
OTU719	d__Bacteria;p__Proteobacteria;c__Gammaproteobacteria;o__HOC36;f__HOC36;g__HOC36;s__uncultured_gamma	0	0	0	0	1.54566	0	0	0	0	7.89716	0	0	2.84043	0	0	1.28833	0.432344	0	0.568096	0	0	0	0	0	0	0	0	0	0	0	0.00801089
OTU720	d__Bacteria;p__Proteobacteria;c__Gammaproteobacteria;o__HOC36;f__HOC36;g__HOC36;s__uncultured_proteobacterium	0	0	0	0	0.15886	0	0	0	0	0.14312	0	0	0.213639	0	0	0.0141965	0.0233699	0	0	0	0	0	0	0	0	0	0	0	0	0	0
OTU721	d__Bacteria;p__Proteobacteria;c__Gammaproteobacteria;o__HOC36;f__HOC36;g__HOC36;s__uncultured_sediment	0	0	0	0	0	0	0	0	0	0	0	0	0	0	0	0	0.011685	0	0	0	0	0	0.192086	0	0	0	0	0	0	0	0
OTU722	d__Bacteria;p__Proteobacteria;c__Gammaproteobacteria;o__HglApr721;f__HglApr721;g__HglApr721;s__uncultured_bacterium	0	0	0	0	0	0	0	0	0	0	16.8368	0	0	0	0	0	0	0	0	0	0	0	0.230503	0	0	0	0	0	0	0	0
OTU723	d__Bacteria;p__Proteobacteria;c__Gammaproteobacteria;o__JTB23;f__JTB23;g__JTB23;s__uncultured_deep-sea	0.00703789	0	0	0	0	0	0	0	0	0	0	0.00557619	0	0.023361	0.00580799	0.0993754	0	0	0.0227238	0	0	0	0	0	0	0	0	0	0	0	0.0160218
OTU724	d__Bacteria;p__Proteobacteria;c__Gammaproteobacteria;o__JTB23;f__JTB23;g__JTB23;s__uncultured_gamma	0	0	0	0	0	0	0	0	0	0	0	0	0	0.0183551	0	0	0	0	0	0	0	0	0	0	0	0.0226809	0	0	0	0	0
OTU725	d__Bacteria;p__Proteobacteria;c__Gammaproteobacteria;o__KI89A_clade;f__KI89A_clade;g__KI89A_clade;__	0	0	0	0	0	0	0.0111514	0	0	0	0.00671682	0.0156133	0.0218494	0.0216923	0.0251679	0.110023	0	0	0.0530223	0	0	0	0	0	0	0	0	0.0176106	0	0	0.0320436
OTU726	d__Bacteria;p__Proteobacteria;c__Gammaproteobacteria;o__KI89A_clade;f__KI89A_clade;g__KI89A_clade;s__uncultured_gamma	0	0	0	0	0	0	0	0	0	0	0	0	0	0.00834321	0	0	0	0	0	0	0	0	0	0	0	0	0	0	0	0	0
OTU727	d__Bacteria;p__Proteobacteria;c__Gammaproteobacteria;o__Legionellales;f__Legionellaceae;__;__	0	0	0	0	0	0	0	0	0	0	0	0	0	0	0	0.00709824	0	0	0	0	0	0	0	0	0	0	0	0	0	0	0
OTU728	d__Bacteria;p__Proteobacteria;c__Gammaproteobacteria;o__Legionellales;f__Legionellaceae;g__uncultured;s__uncultured_gamma	0	0	0	0	0	0	0.0501812	0	0	0	0	0.00780666	0.0218494	0	0	0	0	0	0	0	0	0	0	0	0	0	0	0	0	0	0
OTU729	d__Bacteria;p__Proteobacteria;c__Gammaproteobacteria;o__MBAE14;f__MBAE14;g__MBAE14;__	0	0	0	0	0	0	0	0	0	0	0.00671682	0	0	0.0183551	0	0.0780806	0	0	0	0	0	0	0	0	0	0	0	0	0	0	0
OTU730	d__Bacteria;p__Proteobacteria;c__Gammaproteobacteria;o__Milano-WF1B-44;f__Milano-WF1B-44;g__Milano-WF1B-44;s__uncultured_bacterium	0	0	0	0	0.0300545	0	0	0	0	0	0.0470177	0	0	0	0	0	0	0	0	0	0	0	0	0	0	0	0	0	0	0	0
OTU731	d__Bacteria;p__Proteobacteria;c__Gammaproteobacteria;o__Nitrosococcales;f__Methylophagaceae;__;__	0	0	0	0	0	0	0	0	0	0	0	0	0	0	0	0	0	0	0	0	0	0	0.0768344	0	0	0	0	0	0	0	0
OTU732	d__Bacteria;p__Proteobacteria;c__Gammaproteobacteria;o__Nitrosococcales;f__Methylophagaceae;g__Marine_Methylotrophic_Group_3;s__uncultured_bacterium	0	0	0	0	0	0	0	0	0	0	0	0	0	0	0	0	0	0	0	0	0	0	0	0	0	0	0	0.0422654	0	0	0
OTU733	d__Bacteria;p__Proteobacteria;c__Gammaproteobacteria;o__Nitrosococcales;f__Methylophagaceae;g__uncultured;__	0	0	0	0	0	0	0	0	0	0	0	0.00780666	0	0.00834321	0	0	0	0	0	0.050844	0	0	0	0	0	0	0	0	0.0126401	0	0.0881198
OTU734	d__Bacteria;p__Proteobacteria;c__Gammaproteobacteria;o__Nitrosococcales;f__Methylophagaceae;g__uncultured;s__uncultured_Piscirickettsiaceae	0	0	0.00535198	0	0.0214675	0.046129	0.0334541	0	0.00322945	0	0.00895576	0	0	0	0.015488	0.0425894	0	0	0	0	0.0536985	0	0	0	0.0221766	0	0	0	0	0.0250025	0
OTU735	d__Bacteria;p__Proteobacteria;c__Gammaproteobacteria;o__Nitrosococcales;f__Methylophagaceae;g__uncultured;s__uncultured_bacterium	0	0	0	0	0	0	0	0	0	0	0	0	0	0	0	0	0.00778998	0	0	0	0	0	0	0	0	0	0	0	0	0	0
OTU736	d__Bacteria;p__Proteobacteria;c__Gammaproteobacteria;o__Nitrosococcales;f__Nitrosococcaceae;__;__	0	0	0	0	0	0	0	0	0	0.0102229	0	0	0	0	0	0.0248438	0	0	0	0	0	0	0	0	0	0	0	0	0	0	0
OTU737	d__Bacteria;p__Proteobacteria;c__Gammaproteobacteria;o__Nitrosococcales;f__Nitrosococcaceae;g__Cm1-21;__	0.00563031	0	0	0	0.0128805	0	0	0	0	0	0	0	0	0.0116805	0	0.0212947	0	0	0	0	0	0	0	0	0	0	0	0	0	0	0
OTU738	d__Bacteria;p__Proteobacteria;c__Gammaproteobacteria;o__Nitrosococcales;f__Nitrosococcaceae;g__Cm1-21;s__uncultured_gamma	0.00844547	0	0	0	0	0	0	0	0	0	0	0	0.00485543	0.00834321	0	0.0141965	0	0	0.0189365	0	0	0	0	0	0	0	0	0	0	0	0
OTU739	d__Bacteria;p__Proteobacteria;c__Gammaproteobacteria;o__Nitrosococcales;f__Nitrosococcaceae;g__FS142-36B-02;s__uncultured_bacterium	0	0	0	0	0	0	0	0	0	0	0	0	0	0	0	0.0248438	0	0	0	0	0	0	0	0	0	0	0	0	0	0	0
OTU740	d__Bacteria;p__Proteobacteria;c__Gammaproteobacteria;o__OM182_clade;f__OM182_clade;g__OM182_clade;__	0	0	0	0	0	0	0	0	0	0	0	0	0.0145663	0	0.023232	0.0567859	0	0	0.0189365	0	0	0	0	0	0	0	0	0	0.046347	0	0
OTU741	d__Bacteria;p__Proteobacteria;c__Gammaproteobacteria;o__OM182_clade;f__OM182_clade;g__OM182_clade;s__marine_gamma	0	0	0	0.0103674	0	0	0.0334541	0	0	0	0	0	0	0	0	0	0	0	0	0.0610128	0.0671231	0	0	0	0.0443533	0	0	0	0	0.070007	0
OTU742	d__Bacteria;p__Proteobacteria;c__Gammaproteobacteria;o__OM182_clade;f__OM182_clade;g__OM182_clade;s__seawater_metagenome	0	0	0	0.0124409	0	0.0422849	0	0	0	0	0	0	0	0	0	0	0	0	0	0	0	0	0	0	0	0	0	0	0	0.0850085	0
OTU743	d__Bacteria;p__Proteobacteria;c__Gammaproteobacteria;o__Oceanospirillales;f__Alcanivoracaceae1;g__Alcanivorax;__	0	0	0	0	0	0	0	0	0	0	0.035823	0	0	0	0	0	0	0	0	0	0	0	0	0	0	0	0	0	0	0	0
OTU744	d__Bacteria;p__Proteobacteria;c__Gammaproteobacteria;o__Oceanospirillales;f__Endozoicomonadaceae;g__Endozoicomonas;__	8.38917	0.798446	0.0838477	0.248818	0.197501	0.349812	2.39197	4.06911	2.13144	0.511143	0.0895576	0.297768	0.687043	1.29987	2.10056	0	0.105165	0.498685	0.814271	0.732154	1.7452	0.0846262	5.64733	0.827385	0.249487	4.60422	0.123157	1.96534	0.43819	0.765077	0.0961307
OTU745	d__Bacteria;p__Proteobacteria;c__Gammaproteobacteria;o__Oceanospirillales;f__Endozoicomonadaceae;g__Endozoicomonas;s__Candidatus_Endonucleobacter	0	0	0	0	0	0	0	0	0	0	0	0	0	0	0	0.0532368	0	0	0	0	0	0	0	0	0	0	0	0	0	0	0
OTU746	d__Bacteria;p__Proteobacteria;c__Gammaproteobacteria;o__Oceanospirillales;f__Endozoicomonadaceae;g__Kistimonas;__	0.0126682	0	0.0160559	0	0	0.0153763	0.0111514	0	0	0	0	0.386987	0.0145663	24.5424	0.220704	0	0	0.0383604	0.147705	0.0406752	0	0.169252	0.153669	0	0.0166325	0	0	0.0140885	0	0	0
OTU747	d__Bacteria;p__Proteobacteria;c__Gammaproteobacteria;o__Oceanospirillales;f__Endozoicomonadaceae;g__Kistimonas;s__uncultured_marine	0	0	0	0	0	0	0	0	0	0	0	0	0.00485543	0	0	0	0	0	0	0	0	0	0	0	0	0	0	0	0	0	0
OTU748	d__Bacteria;p__Proteobacteria;c__Gammaproteobacteria;o__Oceanospirillales;f__Kangiellaceae;g__Aliikangiella;s__uncultured_bacterium	0.00563031	0	0	0	0	0	0	0	0	0	0.0111947	0.00780666	0.0145663	0.0150178	0.01936	0.0461386	0.011685	0	0.0302984	0	0	0	0	0	0	0	0	0	0.0168535	0	0.0120163
OTU749	d__Bacteria;p__Proteobacteria;c__Gammaproteobacteria;o__Oceanospirillales;f__Kangiellaceae;g__Pleionea;__	0	0	0	0	0	0.00768817	0	0	0	0	0	0	0	0	0	0	0	0	0	0	0	0	0	0	0	0	0	0	0	0	0
OTU750	d__Bacteria;p__Proteobacteria;c__Gammaproteobacteria;o__Oceanospirillales;f__Kangiellaceae;g__uncultured;__	0.112606	0.0701338	0.00713598	0.0787924	0	0.115323	0.089211	0.0234531	0.0113031	0.0920057	0	0.0780666	0.111675	0.166864	0.265231	0.365559	0.105165	0	0.261324	0	0	0	0	0	0.0443533	0	0	0	0.0421336	0.150015	0.26436
OTU751	d__Bacteria;p__Proteobacteria;c__Gammaproteobacteria;o__Oceanospirillales;f__Marinomonadaceae;g__Marinomonas;__	0	0	0	0	0	0	0	0	0	0	0	0	0	0	0	0	0	0	0	0	0	0	0	0	0	0	0	0	0.117974	0	0
OTU752	d__Bacteria;p__Proteobacteria;c__Gammaproteobacteria;o__Oceanospirillales;f__Nitrincolaceae;g__Marinobacterium;__	0	0	0	0	0	0	0	0	0	0	0.0268673	0	0	0	0	0	0	0	0	0	0	0	0	0	0	0	0	0	0	0	0
OTU753	d__Bacteria;p__Proteobacteria;c__Gammaproteobacteria;o__Oceanospirillales;f__Nitrincolaceae;g__Neptuniibacter;__	0	0	0	0	0	0	0	0.00130295	0	0	0.0537346	0	0	0	0	0	0	0	0	0	0	0	0	0	0	0	0	0	0	0	0
OTU754	d__Bacteria;p__Proteobacteria;c__Gammaproteobacteria;o__Oceanospirillales;f__Nitrincolaceae;g__Profundimonas;s__proteobacterium_symbiont	0	0	0	0.0103674	0	0	0	0.00651474	0	0	0	0.084758	0.0412712	0.0166864	0	0	0	0	0.0908953	0.0305064	0	0	0	0	0	0	0	0	0.151681	0	0
OTU755	d__Bacteria;p__Proteobacteria;c__Gammaproteobacteria;o__Oceanospirillales;f__Nitrincolaceae;g__uncultured;__	0.0577107	0	0	0	0	0	0	0	0	0	0	0	0	0	0	0	0	0	0	0	0	0	0	0	0	0	0	0	0	0	0
OTU756	d__Bacteria;p__Proteobacteria;c__Gammaproteobacteria;o__Oceanospirillales;f__Nitrincolaceae;g__uncultured;s__uncultured_bacterium	0	0	0	0	0	0	0	0	0	0	0	0.0089219	0.016994	0.0533965	0.0696959	0.106474	0.011685	0	0.0568096	0	0	0	0	0.0486697	0	0	0	0	0.0168535	0	0
OTU757	d__Bacteria;p__Proteobacteria;c__Gammaproteobacteria;o__Oceanospirillales;f__Nitrincolaceae;g__uncultured;s__uncultured_marine	0.0872699	0.596137	0.0784957	0.246745	0.433644	3.29822	2.25815	0.0925093	0.188923	1.2523	0.73885	0.434943	0.318031	0.34374	1.32229	0.184554	0.342759	0.438404	0.0681715	3.96583	1.16794	0.141044	1.22935	0.811162	0.936963	0.283511	0.324997	0.729079	0.0210668	1.73017	0.364496
OTU758	d__Bacteria;p__Proteobacteria;c__Gammaproteobacteria;o__Oceanospirillales;f__P13-46;g__P13-46;s__uncultured_bacterium	0	0	0	0	0	0	0	0	0	0	0	0	0	0	0	0.0177456	0	0	0	0	0	0	0	0	0	0	0	0	0	0	0
OTU759	d__Bacteria;p__Proteobacteria;c__Gammaproteobacteria;o__Oceanospirillales;f__Pseudohongiellaceae;g__Pseudohongiella;__	0.0591183	0.0269745	0.0231919	0.0497636	0.042935	0.172984	0.200725	0.00781769	0.00968836	0.07156	0.0403009	0.0345724	0.00971086	0.0433847	0.110352	0.337166	0.0350549	0.0383604	0.0530223	0.274558	0.281917	0.112835	0.307338	0.0811162	0.110883	0	0.0410523	0.133841	0	0.175018	0.0440599
OTU760	d__Bacteria;p__Proteobacteria;c__Gammaproteobacteria;o__Oceanospirillales;f__Saccharospirillaceae;g__Oceaniserpentilla;s__Oceaniserpentilla_haliotis	0	0	0	0	0	0	0	0	0	0	0.0111947	0	0	0	0	0	0	0	0	0	0	0	0	0	0	0	0	0	0	0	0
OTU761	d__Bacteria;p__Proteobacteria;c__Gammaproteobacteria;o__Oceanospirillales;f__Saccharospirillaceae;g__Oleibacter;__	0	0	0	0	0	0	0	0	0	0	0.00223894	0	0	0	0	0	0	0	0	0	0	0	0	0	0	0	0	0	0	0	0
OTU762	d__Bacteria;p__Proteobacteria;c__Gammaproteobacteria;o__Oceanospirillales;f__Saccharospirillaceae;g__Oleispira;__	0	0	0	0.0145144	0	0	0	0	0	0	0	0	0	0	0	0	0	0	0	0	0	0	0	0	0	0	0	0	0.0505604	0	0
OTU763	d__Bacteria;p__Proteobacteria;c__Gammaproteobacteria;o__Oceanospirillales;f__Saccharospirillaceae;g__uncultured;__	0	0	0	0	0	0	0	0	0	0	0	0	0.00728314	0	0	0	0	0	0	0	0	0	0	0	0	0	0	0	0	0	0
OTU764	d__Bacteria;p__Proteobacteria;c__Gammaproteobacteria;o__Oceanospirillales;f__Saccharospirillaceae;g__uncultured;s__uncultured_marine	0	0.00539491	0	0	0	0	0	0	0	0	0	0	0	0	0.00774398	0	0	0	0	0	0	0	0	0	0	0	0	0	0	0	0
OTU765	d__Bacteria;p__Proteobacteria;c__Gammaproteobacteria;o__Pseudomonadales;f__Pseudomonadaceae;g__Pseudomonas;__	0	0	0	0	0	0	0	0	0	0	0	0	0	0	0.00967998	0	0	0	0	0.142363	0	0	0.153669	0	0	0	0	0	0	0	0
OTU766	d__Bacteria;p__Proteobacteria;c__Gammaproteobacteria;o__SAR86_clade;f__SAR86_clade;g__SAR86_clade;__	0	0	0	0	0	0.0153763	0	0	0	0	0	0	0	0	0.00580799	0	0	0	0	0.050844	0	0	0	0	0	0	0.0102631	0	0	0.0650065	0
OTU767	d__Bacteria;p__Proteobacteria;c__Gammaproteobacteria;o__SS1-B-07-19;f__SS1-B-07-19;g__SS1-B-07-19;__	0	0	0	0	0	0	0	0	0	0	0.0134336	0.00669142	0	0.0183551	0	0	0	0	0	0	0	0	0	0	0	0	0	0	0	0	0
OTU768	d__Bacteria;p__Proteobacteria;c__Gammaproteobacteria;o__SZB50;f__SZB50;g__SZB50;s__uncultured_bacterium	0.0126682	0	0	0	0	0	0	0	0	0	0	0.0111524	0	0	0	0.0390403	0	0	0.0265111	0	0	0	0	0	0	0	0	0	0	0	0
OTU769	d__Bacteria;p__Proteobacteria;c__Gammaproteobacteria;o__SZB50;f__SZB50;g__SZB50;s__uncultured_gamma	0.00985305	0	0	0	0	0	0	0	0	0	0	0.02342	0	0.00500592	0	0.0319421	0	0	0.0416604	0	0	0	0	0	0	0	0	0	0	0	0.0280381
OTU770	d__Bacteria;p__Proteobacteria;c__Gammaproteobacteria;o__Salinisphaerales;__;__;__	0	0	0	0	0	0	0	0	0	0	0.00895576	0	0	0	0	0	0	0	0	0	0	0	0	0	0	0	0	0	0	0	0
OTU771	d__Bacteria;p__Proteobacteria;c__Gammaproteobacteria;o__Salinisphaerales;f__Solimonadaceae;g__Polycyclovorans;s__uncultured_Solimonas	0	0	0	0	0	0	0	0	0	0	0.00447788	0	0	0	0	0	0	0	0	0	0	0	0	0	0	0	0	0	0	0	0
OTU772	d__Bacteria;p__Proteobacteria;c__Gammaproteobacteria;o__Steroidobacterales;f__Woeseiaceae;g__Woeseia;__	0.0464501	0.0188822	0	0	0	0	0	0	0	0.0613371	0	0	0	0.0734202	0.0716319	0.592703	0.0662148	0	0.223451	0.0406752	0	0	0	0	0.0110883	0	0	0.0105664	0	0	0.0160218
OTU773	d__Bacteria;p__Proteobacteria;c__Gammaproteobacteria;o__Steroidobacterales;f__Woeseiaceae;g__Woeseia;s__uncultured_marine	0	0	0	0	0	0	0	0	0	0	0	0	0	0	0	0	0	0	0	0	0	0	0	0	0	0.0340213	0	0	0	0	0
OTU774	d__Bacteria;p__Proteobacteria;c__Gammaproteobacteria;o__Tenderiales;f__Tenderiaceae;g__Candidatus_Tenderia;s__uncultured_bacterium	0	0	0	0	0	0	0	0	0	0	0	0	0	0	0	0	0	0	0.0113619	0	0	0	0	0	0	0	0	0	0	0	0
OTU775	d__Bacteria;p__Proteobacteria;c__Gammaproteobacteria;o__Tenderiales;f__Tenderiaceae;g__Candidatus_Tenderia;s__uncultured_gamma	0.0154834	0	0	0	0	0	0	0	0	0	0.0156726	0.00557619	0.016994	0.0166864	0	0.298126	0	0	0	0	0	0	0	0	0	0	0	0.0211327	0	0	0.0961307
OTU776	d__Bacteria;p__Proteobacteria;c__Gammaproteobacteria;o__Thiohalorhabdales;f__Thiohalorhabdaceae;g__uncultured;s__uncultured_bacterium	0	0	0	0	0	0	0	0	0	0	0.00895576	0	0.00971086	0.0450533	0.011616	0.166809	0	0	0.0265111	0	0	0	0	0	0	0	0	0	0	0.0350035	0
OTU777	d__Bacteria;p__Proteobacteria;c__Gammaproteobacteria;o__Thiomicrospirales;f__Thioglobaceae;__;__	0	0	0	0	0	0	0	0	0	0	0.635859	0	0	0	0	0	0	0	0	0.0203376	0	0	0	0	0	0	0	0	0	0	0
OTU778	d__Bacteria;p__Proteobacteria;c__Gammaproteobacteria;o__Thiomicrospirales;f__Thioglobaceae;g__SUP05_cluster;__	0.0140758	0.350669	0.0303279	0.0622045	0.545275	1.01868	0.485085	0.0651474	0.0678185	2.82151	0.266434	0.0602228	3.98874	0.100118	0.489807	0.716922	0.268754	0.194542	0.0340857	4.1387	1.58411	0.169252	1.30619	0.681376	0.609858	0.26083	0.229209	0.486052	0.0210668	0.20002	0.164223
OTU779	d__Bacteria;p__Proteobacteria;c__Gammaproteobacteria;o__Thiotrichales;f__Thiotrichaceae;g__Cocleimonas;__	0	0	0	0	0	0	0	0	0	0	0	0	0	0	0	0.0106474	0	0	0	0	0	0	0	0	0	0	0	0	0	0	0
OTU780	d__Bacteria;p__Proteobacteria;c__Gammaproteobacteria;o__Thiotrichales;f__Thiotrichaceae;g__Cocleimonas;s__uncultured_bacterium	0.0450425	0.0242771	0	0.0331757	0.0214675	0.0269086	0	0.0338767	0.0129178	0.0664486	0	0.0256505	0.0704037	0.065077	0.0600159	0.628194	0.00778998	0.00548005	0.0454477	0	0.0671231	0	0	0	0	0	0	0	0.0252802	0.010001	0
OTU781	d__Bacteria;p__Proteobacteria;c__Gammaproteobacteria;o__Thiotrichales;f__Thiotrichaceae;g__Leucothrix;__	0.00703789	0.0107898	0	0	0	0	0	0	0	0.03578	0	0.0156133	0.0388434	0.0133491	0.0387199	0.106474	0	0	0	0	0	0	0	0	0	0	0	0	0	0	0
OTU782	d__Bacteria;p__Proteobacteria;c__Gammaproteobacteria;o__Thiotrichales;f__Thiotrichaceae;g__Thiothrix;__	0	0	0	0	0	0	0	0	0	0	0	0	0.00728314	0	0	0	0	0	0	0	0	0	0	0	0	0	0	0	0	0	0
OTU783	d__Bacteria;p__Proteobacteria;c__Gammaproteobacteria;o__Thiotrichales;f__Thiotrichaceae;g__Thiothrix;s__Thiothrix_sp.	0	0	0	0	0	0	0	0.00651474	0	0	0	0.00780666	0	0	0	0	0	0	0	0	0	0	0	0	0	0	0	0	0	0	0
OTU784	d__Bacteria;p__Proteobacteria;c__Gammaproteobacteria;o__Thiotrichales;f__Thiotrichaceae;g__uncultured;s__Gammaproteobacteria_bacterium	0	0.00809236	0	0	0.0601091	0.0230645	0	0	0	0	0	0.0591076	0	0.0400474	0	0	0	0.00822008	0.121194	0	0	0	0	0	0	0	0.0136841	0	0	0	0
OTU785	d__Bacteria;p__Proteobacteria;c__Gammaproteobacteria;o__Thiotrichales;f__Thiotrichaceae;g__uncultured;s__uncultured_hydrocarbon	0	0	0	0	0	0	0	0	0	0	0	0	0	0	0	0.0106474	0	0	0	0	0	0	0	0	0	0	0	0	0	0	0
OTU786	d__Bacteria;p__Proteobacteria;c__Gammaproteobacteria;o__Thiotrichales;f__Thiotrichaceae;g__uncultured;s__uncultured_marine	0	0.00539491	0.0196239	0.0870863	0	0.0115323	0.0501812	0	0	0	0	0.00669142	0	0	0.017424	0	0	0	0	0.0711816	0.0671231	0	0	0	0	0	0	0	0	0.280028	0
OTU787	d__Bacteria;p__Proteobacteria;c__Gammaproteobacteria;o__Thiotrichales;f__Thiotrichaceae;g__uncultured;s__uncultured_sediment	0	0	0	0	0	0	0	0	0	0	0	0	0	0.00834321	0	0	0	0	0	0	0	0	0	0	0	0	0	0	0	0	0
OTU788	d__Bacteria;p__Proteobacteria;c__Gammaproteobacteria;o__UBA10353_marine_group;f__UBA10353_marine_group;g__UBA10353_marine_group;__	0.00985305	0	0	0	0	0	0	0	0	0	0	0.0323419	0	0.023361	0	0.060335	0.0272649	0	0	0	0	0	0	0	0	0	0	0	0	0.030003	0
OTU789	d__Bacteria;p__Proteobacteria;c__Gammaproteobacteria;o__UBA10353_marine_group;f__UBA10353_marine_group;g__UBA10353_marine_group;s__uncultured_bacterium	0	0	0	0	29.2559	0	0	0	0	27.1059	0.0179115	0	32.5095	0.0567338	0.0522719	23.1651	0.260964	0.00822008	0.178003	0	0	0	0	0	0	0	0	0	0.0168535	0	0.108147
OTU790	d__Bacteria;p__Proteobacteria;c__Gammaproteobacteria;o__UBA10353_marine_group;f__UBA10353_marine_group;g__UBA10353_marine_group;s__uncultured_deep-sea	0	0	0	0	0	0	0	0	0	0	0	0	0	0	0	0.0461386	0	0	0	0	0	0	0	0	0	0	0	0.126796	0	0	0
OTU791	d__Bacteria;p__Proteobacteria;c__Gammaproteobacteria;o__Vibrionales;f__Vibrionaceae;g__Aliivibrio;__	0	0	0	0.00829394	0	0	0	0	0	0	0	0	0	0	0	0	0	0	0	0	0	0	0	0	0	0	0	0	0	0	0
OTU792	d__Bacteria;p__Proteobacteria;c__Gammaproteobacteria;o__Vibrionales;f__Vibrionaceae;g__Vibrio;__	0	0	0	0	0	0	0	0	0	0	0.00895576	0	0	0	0	0	0	0	0	0	0	0	0	0	0	0	0	0	0	0	0
OTU793	d__Bacteria;p__Proteobacteria;c__Gammaproteobacteria;o__Xanthomonadales;f__Rhodanobacteraceae;g__uncultured;__	0	0	0	0	0	0	0	0	0	0	0	0.00223047	0	0	0	0	0	0	0.0151492	0	0	0	0	0	0	0	0	0	0	0	0
OTU794	d__Bacteria;p__Proteobacteria;c__Gammaproteobacteria;o__Xanthomonadales;f__Xanthomonadaceae;__;__	0	0	0	0	0	0	0	0	0	0	0	0	0	0	0	0	0	0	0	0	0	0	0.0768344	0	0	0	0	0	0	0	0
OTU795	d__Bacteria;p__Proteobacteria;c__Gammaproteobacteria;o__Xanthomonadales;f__Xanthomonadaceae;g__Lysobacter;__	0	0	0	0	0	0	0	0	0	0	0	0	0	0	0	0	0	0	0	0	0	0	0.653093	0	0	0	0	0	0	0	0
OTU796	d__Bacteria;p__Proteobacteria;c__Gammaproteobacteria;o__Xanthomonadales;f__Xanthomonadaceae;g__Stenotrophomonas;__	0	0	0	0	0	0	0	0	0	0	0	0	0	0	0	0	0	0	0	0.0305064	0	0	0.153669	0	0	0	0	0	0	0	0
OTU797	d__Bacteria;p__Proteobacteria;c__Gammaproteobacteria;o__pItb-vmat-80;f__pItb-vmat-80;g__pItb-vmat-80;__	0	0	0	0	0	0	0	0	0	0	0	0.0089219	0.016994	0	0.00967998	0	0	0	0.037873	0	0	0	0	0	0	0	0	0	0	0	0
OTU798	d__Bacteria;p__Proteobacteria;c__Gammaproteobacteria;o__pItb-vmat-80;f__pItb-vmat-80;g__pItb-vmat-80;s__uncultured_bacterium	0.00563031	0	0	0	0	0	0	0	0	0	0.0134336	0	0	0.0100118	0	0.028393	0	0	0	0	0	0	0	0	0	0	0	0	0	0	0
OTU799	d__Bacteria;p__Proteobacteria;c__Gammaproteobacteria;o__uncultured;f__uncultured;g__uncultured;s__uncultured_Thioalkalivibrio	0	0	0	0	0.0128805	0	0	0	0	0	0	0	0	0	0	0	0	0	0	0	0	0	0	0	0	0	0	0	0	0	0
OTU800	d__Bacteria;p__Proteobacteria;c__Gammaproteobacteria;o__uncultured;f__uncultured;g__uncultured;s__uncultured_gamma	0	0	0	0	0	0	0	0	0	0	0	0	0	0	0	0	0	0	0	0.0305064	0	0	0	0	0	0	0	0	0	0	0
OTU801	d__Bacteria;p__SAR324_clade(Marine_group_B);c__SAR324_clade(Marine_group_B);o__SAR324_clade(Marine_group_B);f__SAR324_clade(Marine_group_B);g__SAR324_clade(Marine_group_B);__	0	0	0	0	0	0	0.0111514	0	0	0	0	0	0	0	0	0	0	0	0	0	0	0	0	0	0.0166325	0.0226809	0	0	0	0	0
OTU802	d__Bacteria;p__SAR324_clade(Marine_group_B);c__SAR324_clade(Marine_group_B);o__SAR324_clade(Marine_group_B);f__SAR324_clade(Marine_group_B);g__SAR324_clade(Marine_group_B);s__uncultured_bacterium	0	0	0	0	0.0128805	0	0	0	0	0.0153343	0	0	0.00728314	0	0	0	0	0	0	0	0	0	0	0	0	0	0	0	0	0	0
OTU803	d__Bacteria;p__Spirochaetota;c__Leptospirae;o__Leptospirales;f__Leptospiraceae;g__Turneriella;s__uncultured_bacterium	0	0	0	0	0	0	0	0	0	0	0	0	0	0.00333728	0.00387199	0	0	0	0	0	0	0	0	0	0	0	0	0	0	0	0
OTU804	d__Bacteria;p__Spirochaetota;c__Leptospirae;o__Leptospirales;f__Leptospiraceae;g__uncultured;s__uncultured_Spirochaetales	0	0	0	0	0	0	0	0	0	0	0	0	0	0	0	0.00709824	0	0	0	0	0	0	0	0	0	0	0	0	0	0	0
OTU805	d__Bacteria;p__Spirochaetota;c__Spirochaetia;o__Spirochaetales;f__Spirochaetaceae;g__Sphaerochaeta;s__Pleomorphochaeta_multiformis	0	0	0	0	0	0	0	0	0	0	0	0	0	0	0	0	0	0	0	0.050844	0.0536985	0	0	0	0	0	0	0	0	0	0
OTU806	d__Bacteria;p__Spirochaetota;c__Spirochaetia;o__Spirochaetales;f__Spirochaetaceae;g__Spirochaeta_2;s__Spirochaeta_perfilievii	0	0	0	0	0	0	0	0	0	0	0	0	0	0	0	0	0	0	0	0.0915192	0	0	0	0	0	0	0	0	0	0	0
OTU807	d__Bacteria;p__Spirochaetota;c__Spirochaetia;o__Spirochaetales;f__Spirochaetaceae;g__Spirochaeta_2;s__Spirochaeta_psychrophila	0	0	0	0	0	0	0	0.0026059	0	0	0	0	0	0	0	0	0	0	0	0.0406752	0	0	0	0	0	0	0	0	0	0	0
OTU808	d__Bacteria;p__Spirochaetota;c__Spirochaetia;o__Spirochaetales;f__Spirochaetaceae;g__uncultured;s__uncultured_organism	0	0	0	0	0.034348	0	0	0	0	0.0102229	0	0	0.0121386	0	0	0	0	0	0	0	0	0	0	0	0	0	0	0.00704424	0	0	0
OTU809	d__Bacteria;p__Spirochaetota;c__Spirochaetia;o__Spirochaetales;f__Spirochaetaceae;g__uncultured;s__uncultured_soil	0	0	0	0	0	0	0	0	0	0.0306686	0	0	0	0	0	0	0	0	0	0	0	0	0	0	0	0	0	0	0	0	0
OTU810	d__Bacteria;p__Verrucomicrobiota;c__Chlamydiae;o__Chlamydiales;f__Chlamydiaceae;g__uncultured;s__uncultured_Chlamydiales	0	0	0	0	0	0	0	0	0	0	0	0	0	0	0	0	0.00778998	0	0	0	0	0	0	0	0	0	0	0	0	0	0
OTU811	d__Bacteria;p__Verrucomicrobiota;c__Kiritimatiellae;o__Kiritimatiellales;f__Kiritimatiellaceae;g__MSBL3;s__uncultured_bacterium	0.00281516	0	0	0	0	0	0	0	0	0	0	0	0	0	0	0	0	0	0	0	0	0	0	0	0	0	0	0	0	0	0
OTU812	d__Bacteria;p__Verrucomicrobiota;c__Kiritimatiellae;o__Kiritimatiellales;f__Kiritimatiellaceae;g__R76-B128;__	0	0	0	0.00414697	0	0	0	0	0	0	0	0	0.00485543	0.0400474	0	0.0425894	0	0	0.0265111	0.050844	0	0	0	0	0	0	0	0	0.0126401	0	0.0160218
OTU813	d__Bacteria;p__Verrucomicrobiota;c__Kiritimatiellae;o__Kiritimatiellales;f__Kiritimatiellaceae;g__R76-B128;s__uncultured_bacterium	0	0	0	0	0	0	0	0	0	0.0153343	0	0	0	0	0	0	0	0	0	0	0	0	0	0	0	0	0	0	0	0	0
OTU814	d__Bacteria;p__Verrucomicrobiota;c__Kiritimatiellae;o__WCHB1-41;f__WCHB1-41;g__WCHB1-41;__	0	0	0	0	0	0	0	0	0	0	0	0.00223047	0	0.0150178	0.00580799	0	0	0	0	0	0	0	0	0	0	0	0	0	0	0	0.0200272
OTU815	d__Bacteria;p__Verrucomicrobiota;c__Kiritimatiellae;o__WCHB1-41;f__WCHB1-41;g__WCHB1-41;s__uncultured_Verrucomicrobia	0	0	0.00356799	0	0	0	0	0	0	0	0	0	0	0	0	0.0141965	0	0	0	0	0	0	0	0	0	0	0	0	0	0	0
OTU816	d__Bacteria;p__Verrucomicrobiota;c__Kiritimatiellae;o__WCHB1-41;f__WCHB1-41;g__WCHB1-41;s__uncultured_organism	0	0	0	0	0	0	0	0	0	0	0	0	0	0.0166864	0	0.028393	0	0	0	0	0	0	0	0	0	0	0	0	0.0126401	0	0
OTU817	d__Bacteria;p__Verrucomicrobiota;c__Lentisphaeria;__;__;__;__	0	0	0	0	0	0	0	0	0	0.0102229	0	0	0	0.0216923	0.00580799	0.0106474	0	0	0	0	0	0	0	0	0	0	0	0	0	0	0
OTU818	d__Bacteria;p__Verrucomicrobiota;c__Lentisphaeria;o__Lentisphaerales;f__Lentisphaeraceae;g__Lentisphaera;__	0	0	0	0	0	0.00768817	0	0	0	0	0	0	0	0.0116805	0	0	0	0	0	0	0	0	0	0	0	0	0	0.028177	0	0	0
OTU819	d__Bacteria;p__Verrucomicrobiota;c__Lentisphaeria;o__Lentisphaerales;f__Lentisphaeraceae;g__Lentisphaera;s__uncultured_Lentisphaerae	0	0	0	0	0	0	0	0	0	0	0	0	0.00728314	0.00834321	0.00967998	0	0	0	0.0151492	0	0	0	0	0	0	0	0	0	0	0	0.0280381
OTU820	d__Bacteria;p__Verrucomicrobiota;c__Lentisphaeria;o__Lentisphaerales;f__Lentisphaeraceae;g__Lentisphaera;s__uncultured_bacterium	0	0	0	0	0	0	0.128241	0	0	0	0	0.018959	0.016994	0	0	0.0177456	0.00778998	0	0	0	0	0	0	0	0	0	0	0	0	0	0
OTU821	d__Bacteria;p__Verrucomicrobiota;c__Lentisphaeria;o__Lentisphaerales;f__Lentisphaeraceae;g__Lentisphaera;s__uncultured_marine	0.00703789	0	0	0	0	0	0	0	0	0	0	0	0	0	0	0.0141965	0	0	0	0	0	0	0	0	0	0	0	0	0	0	0
OTU822	d__Bacteria;p__Verrucomicrobiota;c__Lentisphaeria;o__Victivallales;f__Arctic95B-14;g__Arctic95B-14;s__uncultured_bacterium	0	0	0	0	0	0	0	0	0	0	0.00895576	0	0.00485543	0	0	0	0	0	0	0	0	0	0	0	0	0	0	0	0	0	0
OTU823	d__Bacteria;p__Verrucomicrobiota;c__Omnitrophia;o__Omnitrophales;f__Omnitrophaceae;g__Candidatus_Omnitrophus;__	0	0	0	0	0	0	0	0	0	0	0	0	0	0	0.011616	0	0	0	0.0113619	0	0	0	0	0	0	0	0	0	0	0	0.0160218
OTU824	d__Bacteria;p__Verrucomicrobiota;c__Omnitrophia;o__Omnitrophales;f__Omnitrophaceae;g__Candidatus_Omnitrophus;s__Omnitrophica_bacterium	0	0	0	0	0	0	0	0	0	0	0.00447788	0	0	0	0	0	0	0	0	0	0	0	0	0	0	0	0	0	0	0	0
OTU825	d__Bacteria;p__Verrucomicrobiota;c__Omnitrophia;o__Omnitrophales;f__Omnitrophaceae;g__Candidatus_Omnitrophus;s__uncultured_bacterium	0	0	0.012488	0	0	0	0	0	0	0	0	0	0	0	0	0	0	0	0	0	0	0	0	0	0	0	0.00684205	0	0	0	0
OTU826	d__Bacteria;p__Verrucomicrobiota;c__Verrucomicrobiae;o__Methylacidiphilales;f__Methylacidiphilaceae;g__uncultured;s__uncultured_Verrucomicrobiaceae	0	0	0	0	0	0	0	0	0	0	0	0	0	0	0	0	0	0	0.0113619	0	0	0	0	0	0	0	0	0	0	0	0
OTU827	d__Bacteria;p__Verrucomicrobiota;c__Verrucomicrobiae;o__Opitutales;f__Opitutaceae;g__Diplosphaera;__	0	0	0	0	0	0	0	0	0	0	0	0	0	0.0100118	0	0	0	0	0	0	0	0	0	0	0	0	0	0	0	0	0
OTU828	d__Bacteria;p__Verrucomicrobiota;c__Verrucomicrobiae;o__Opitutales;f__Puniceicoccaceae;g__Cerasicoccus;s__uncultured_deep-sea	0	0	0	0	0	0	0	0	0	0	0	0	0	0.00667456	0	0	0	0	0	0	0	0	0	0	0	0	0	0	0	0	0
OTU829	d__Bacteria;p__Verrucomicrobiota;c__Verrucomicrobiae;o__Opitutales;f__Puniceicoccaceae;g__Cerasicoccus;s__uncultured_organism	0	0	0	0	0	0	0	0	0	0	0	0	0	0	0	0.00709824	0	0	0	0	0	0	0	0	0	0	0	0	0	0	0
OTU830	d__Bacteria;p__Verrucomicrobiota;c__Verrucomicrobiae;o__Opitutales;f__Puniceicoccaceae;g__Lentimonas;s__uncultured_Verrucomicrobiales	0	0	0	0	0	0	0	0	0	0	0	0	0	0.00667456	0	0	0	0	0	0	0	0	0	0	0	0	0	0	0	0	0
OTU831	d__Bacteria;p__Verrucomicrobiota;c__Verrucomicrobiae;o__Opitutales;f__Puniceicoccaceae;g__Lentimonas;s__uncultured_bacterium	0	0	0	0	0	0	0	0	0	0	0	0	0	0	0	0.0461386	0	0	0	0	0	0	0	0	0	0	0	0	0	0	0
OTU832	d__Bacteria;p__Verrucomicrobiota;c__Verrucomicrobiae;o__Opitutales;f__Puniceicoccaceae;g__Puniceicoccus;s__uncultured_Verrucomicrobia	0	0	0	0	0	0	0	0	0	0	0	0	0	0	0	0	0	0	0	0.0203376	0	0	0	0	0	0	0	0	0	0	0
OTU833	d__Bacteria;p__Verrucomicrobiota;c__Verrucomicrobiae;o__Opitutales;f__uncultured;g__uncultured;s__uncultured_bacterium	0	0	0	0	0	0	0	0	0	0	0	0	0	0.00500592	0	0	0	0	0	0	0	0	0	0	0	0	0	0	0	0	0
OTU834	d__Bacteria;p__Verrucomicrobiota;c__Verrucomicrobiae;o__Pedosphaerales;f__Pedosphaeraceae;__;__	0	0	0	0	0	0	0	0	0	0	0	0	0	0	0	0.028393	0	0	0	0	0	0	0	0	0	0	0	0	0	0	0
OTU835	d__Bacteria;p__Verrucomicrobiota;c__Verrucomicrobiae;o__Verrucomicrobiales;__;__;__	0	0	0	0	0	0	0	0	0	0	0	0	0	0	0	0.0354912	0	0	0	0	0	0	0	0	0	0	0	0	0	0	0
OTU836	d__Bacteria;p__Verrucomicrobiota;c__Verrucomicrobiae;o__Verrucomicrobiales;f__DEV007;g__DEV007;__	0	0	0	0	0	0	0	0	0	0	0	0.00223047	0.00485543	0.0183551	0.00387199	0.0709824	0	0	0.0113619	0	0	0	0	0	0	0	0	0	0	0	0
OTU837	d__Bacteria;p__Verrucomicrobiota;c__Verrucomicrobiae;o__Verrucomicrobiales;f__DEV007;g__DEV007;s__Verrucomicrobia_bacterium	0	0	0	0	0	0	0	0	0	0	0	0	0	0.0150178	0	0.0319421	0	0	0	0	0	0	0	0	0	0	0	0	0	0	0
OTU838	d__Bacteria;p__Verrucomicrobiota;c__Verrucomicrobiae;o__Verrucomicrobiales;f__DEV007;g__DEV007;s__uncultured_Verrucomicrobia	0.00422274	0	0	0	0.00858701	0	0	0	0	0	0	0	0.00728314	0.0216923	0.00967998	0.124219	0	0	0.0151492	0	0	0	0	0	0	0	0	0	0	0	0
OTU839	d__Bacteria;p__Verrucomicrobiota;c__Verrucomicrobiae;o__Verrucomicrobiales;f__DEV007;g__DEV007;s__uncultured_bacterium	0	0	0	0	0	0	0	0	0	0	0	0	0	0	0	0.0212947	0	0	0	0	0	0	0	0	0	0	0	0	0	0	0
OTU840	d__Bacteria;p__Verrucomicrobiota;c__Verrucomicrobiae;o__Verrucomicrobiales;f__DEV007;g__DEV007;s__uncultured_deep-sea	0.00281516	0	0	0	0	0	0	0	0	0	0	0	0	0	0	0	0	0	0	0	0	0	0	0	0	0	0	0	0	0	0
OTU841	d__Bacteria;p__Verrucomicrobiota;c__Verrucomicrobiae;o__Verrucomicrobiales;f__Rubritaleaceae;g__Haloferula;s__uncultured_bacterium	0	0	0	0	0	0	0	0	0	0	0	0	0	0.0200237	0	0.0780806	0	0	0	0	0	0	0	0	0	0	0	0	0.0168535	0	0
OTU842	d__Bacteria;p__Verrucomicrobiota;c__Verrucomicrobiae;o__Verrucomicrobiales;f__Rubritaleaceae;g__Luteolibacter;s__uncultured_organism	0	0	0	0	0	0	0	0	0	0	0	0	0	0	0	0.0141965	0	0	0	0	0	0	0	0	0	0	0	0	0	0	0
OTU843	d__Bacteria;p__Verrucomicrobiota;c__Verrucomicrobiae;o__Verrucomicrobiales;f__Rubritaleaceae;g__Persicirhabdus;__	0.0182985	0	0	0	0	0	0	0	0	0.0153343	0	0.0089219	0.0291326	0.0734202	0.017424	0.198751	0.01558	0	0	0	0	0	0	0	0	0	0	0	0	0.020002	0.0400545
OTU844	d__Bacteria;p__Verrucomicrobiota;c__Verrucomicrobiae;o__Verrucomicrobiales;f__Rubritaleaceae;g__Persicirhabdus;s__uncultured_Verrucomicrobia	0	0	0	0	0	0.0153763	0	0	0	0	0.0156726	0	0	0	0	0.0674333	0	0	0	0	0	0	0	0	0	0	0	0	0	0	0
OTU845	d__Bacteria;p__Verrucomicrobiota;c__Verrucomicrobiae;o__Verrucomicrobiales;f__Rubritaleaceae;g__Persicirhabdus;s__uncultured_bacterium	0	0	0	0	0	0	0	0	0	0	0	0	0	0	0	0.0674333	0	0	0	0	0	0	0	0	0	0	0	0	0	0	0
OTU846	d__Bacteria;p__Verrucomicrobiota;c__Verrucomicrobiae;o__Verrucomicrobiales;f__Rubritaleaceae;g__Roseibacillus;__	0	0.00809236	0	0	0	0.00768817	0	0	0	0	0	0	0	0.0100118	0	0.0354912	0	0	0.0113619	0	0	0	0	0	0	0	0	0	0	0	0
OTU847	d__Bacteria;p__Verrucomicrobiota;c__Verrucomicrobiae;o__Verrucomicrobiales;f__Rubritaleaceae;g__Roseibacillus;s__seawater_metagenome	0	0	0	0	0	0	0	0.00521179	0	0	0	0	0	0	0	0	0	0	0	0	0	0	0	0	0	0	0	0	0	0	0
OTU848	d__Bacteria;p__Verrucomicrobiota;c__Verrucomicrobiae;o__Verrucomicrobiales;f__Rubritaleaceae;g__Roseibacillus;s__uncultured_Roseibacillus	0	0	0	0	0	0	0	0	0	0	0	0	0	0.0317042	0	0.0567859	0	0	0	0	0	0	0	0	0	0	0	0	0	0	0
OTU849	d__Bacteria;p__Verrucomicrobiota;c__Verrucomicrobiae;o__Verrucomicrobiales;f__Rubritaleaceae;g__Roseibacillus;s__uncultured_deep-sea	0.00563031	0	0	0	0	0	0	0	0	0	0	0	0.016994	0	0	0.088728	0	0	0	0	0	0	0	0	0	0	0	0	0	0	0
OTU850	d__Bacteria;p__Verrucomicrobiota;c__Verrucomicrobiae;o__Verrucomicrobiales;f__Rubritaleaceae;g__Roseibacillus;s__uncultured_organism	0	0	0	0	0	0	0	0	0	0	0	0	0	0.00500592	0	0	0	0	0	0	0	0	0	0	0	0	0	0	0	0	0
OTU851	d__Bacteria;p__Verrucomicrobiota;c__Verrucomicrobiae;o__Verrucomicrobiales;f__Rubritaleaceae;g__Rubritalea;__	0.0197061	0	0	0	0	0	0.0780597	0	0	0	0.0179115	0.00557619	0.0145663	0.0133491	0	0.500426	0	0	0	0	0	0	0	0	0	0	0	0	0	0.030003	0
OTU852	d__Bacteria;p__Verrucomicrobiota;c__Verrucomicrobiae;o__Verrucomicrobiales;f__Rubritaleaceae;g__Rubritalea;s__uncultured_bacterium	0.0154834	0.0863185	0.0445999	0	0	0	0	0.00781769	0	0	0	0.373605	0.0194217	0.0717516	0.013552	0.716922	0	0.0328803	0	0	0	0.0564175	0	0	0	0	0	0.0140885	0.0632005	0	0.0280381
OTU853	d__Bacteria;p__WPS-2;c__WPS-2;o__WPS-2;f__WPS-2;g__WPS-2;s__hydrothermal_vent	0	0	0	0	0	0	0	0.0026059	0	0	0	0	0	0	0	0	0	0	0.0113619	0	0	0	0	0	0	0	0	0	0	0	0
OTU854	Unassigned;__;__;__;__;__;__	0.00281516	0	0	0	0	0	0	0	0	0	0	0	0	0	0	0	0	0	0	0	0	0	0	0	0	0	0	0	0	0	0
	Total	100	100	100	100	100	100	100	100	100	100	100	100	100	100	100	100	100	100	100	100	100	100	100	100	100	100	100	100	100	100	100
